# Supplementary material for: Added value of electrical impedance spectroscopy in adjunction of colposcopy: a prospective cohort study
Source: PubMed Central journal article supplement (PMC10619076; doi:10.1136/bmjopen-2023-074921), 2023-10-29

# BMJ Open

BMJ Open is committed to open peer review. As part of this commitment we make the peer review history of every article we publish publicly available.

When an article is published we post the peer reviewers' comments and the authors' responses online. We also post the versions of the paper that were used during peer review. These are the versions that the peer review comments apply to.

The versions of the paper that follow are the versions that were submitted during the peer review process. They are not the versions of record or the final published versions. They should not be cited or distributed as the published version of this manuscript.

BMJ Open is an open access journal and the full, final, typeset and author-corrected version of record of the manuscript is available on our site with no access controls, subscription charges or pay-per-view fees (<http://bmjopen.bmj.com>).

If you have any questions on BMJ Open's open peer review process please email [info.bmjopen@bmj.com](mailto:info.bmjopen@bmj.com)

# BMJ Open

## Added value of electrical impedance spectroscopy in adjunction of colposcopy: a prospective cohort study

|                               |                                                                                                                                                                                                                                                                                                                                                                                                                                                                                                                                                                                                                                                                                                                                                                                                                                                                                                                                                                                                                                                                                                                                                                                                                                                                                                                                                                                                                                                                                                                                                                      |
|-------------------------------|----------------------------------------------------------------------------------------------------------------------------------------------------------------------------------------------------------------------------------------------------------------------------------------------------------------------------------------------------------------------------------------------------------------------------------------------------------------------------------------------------------------------------------------------------------------------------------------------------------------------------------------------------------------------------------------------------------------------------------------------------------------------------------------------------------------------------------------------------------------------------------------------------------------------------------------------------------------------------------------------------------------------------------------------------------------------------------------------------------------------------------------------------------------------------------------------------------------------------------------------------------------------------------------------------------------------------------------------------------------------------------------------------------------------------------------------------------------------------------------------------------------------------------------------------------------------|
| Journal:                      | <i>BMJ Open</i>                                                                                                                                                                                                                                                                                                                                                                                                                                                                                                                                                                                                                                                                                                                                                                                                                                                                                                                                                                                                                                                                                                                                                                                                                                                                                                                                                                                                                                                                                                                                                      |
| Manuscript ID                 | bmjopen-2023-074921                                                                                                                                                                                                                                                                                                                                                                                                                                                                                                                                                                                                                                                                                                                                                                                                                                                                                                                                                                                                                                                                                                                                                                                                                                                                                                                                                                                                                                                                                                                                                  |
| Article Type:                 | Original research                                                                                                                                                                                                                                                                                                                                                                                                                                                                                                                                                                                                                                                                                                                                                                                                                                                                                                                                                                                                                                                                                                                                                                                                                                                                                                                                                                                                                                                                                                                                                    |
| Date Submitted by the Author: | 20-Apr-2023                                                                                                                                                                                                                                                                                                                                                                                                                                                                                                                                                                                                                                                                                                                                                                                                                                                                                                                                                                                                                                                                                                                                                                                                                                                                                                                                                                                                                                                                                                                                                          |
| Complete List of Authors:     | <p>Bergqvist, Laura; Helsinki University Central Hospital, Department of Obstetrics and Gynecology; Helsingin yliopisto<br/> Heinonen, Annu; Helsinki University Central Hospital, Department of Obstetrics and Gynecology; Helsingin yliopisto<br/> Carcopino, Xavier; IRD, Department of Obstetrics and Gynecology<br/> Redman, Charles ; Royal Stoke University Hospital, Department of Obstetrics and Gynecology<br/> Aro, Karoliina; Helsinki University Central Hospital, Department of Obstetrics and Gynecology; Helsingin yliopisto<br/> Kiviharju, Mari; Helsinki University Central Hospital, Department of Obstetrics and Gynecology; Helsingin yliopisto<br/> Virtanen, Seppo; Helsinki University Central Hospital, Department of Obstetrics and Gynecology; Helsingin yliopisto<br/> Omar, Pirjo-Liisa; Helsinki University Central Hospital, Department of Obstetrics and Gynecology; Helsingin yliopisto<br/> Kotaniemi-Talonen, Laura; Tampere University, Department of Obstetrics and Gynecology; Tampere University Hospital, Department of Obstetrics and Gynecology<br/> Louvanto, Karolina; Tampere University, Department of Obstetrics and Gynecology; Tampere University Hospital, Department of Obstetrics and Gynecology<br/> Nieminen, Pekka; Helsingin Yliopisto; Helsinki University Central Hospital, Department of Obstetrics and Gynecology<br/> Kalliala, Ilkka ; Helsinki University Central Hospital Department of Obstetrics and Gynaecology; Imperial College London Department of Metabolism Digestion and Reproduction</p> |
| Keywords:                     | Colposcopy < GYNAECOLOGY, Gynaecological oncology < GYNAECOLOGY, Community gynaecology < GYNAECOLOGY                                                                                                                                                                                                                                                                                                                                                                                                                                                                                                                                                                                                                                                                                                                                                                                                                                                                                                                                                                                                                                                                                                                                                                                                                                                                                                                                                                                                                                                                 |
|                               |                                                                                                                                                                                                                                                                                                                                                                                                                                                                                                                                                                                                                                                                                                                                                                                                                                                                                                                                                                                                                                                                                                                                                                                                                                                                                                                                                                                                                                                                                                                                                                      |

SCHOLARONE™  
Manuscripts

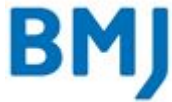

I, the Submitting Author has the right to grant and does grant on behalf of all authors of the Work (as defined in the below author licence), an exclusive licence and/or a non-exclusive licence for contributions from authors who are: i) UK Crown employees; ii) where BMJ has agreed a CC-BY licence shall apply, and/or iii) in accordance with the terms applicable for US Federal Government officers or employees acting as part of their official duties; on a worldwide, perpetual, irrevocable, royalty-free basis to BMJ Publishing Group Ltd ("BMJ") its licensees and where the relevant Journal is co-owned by BMJ to the co-owners of the Journal, to publish the Work in this journal and any other BMJ products and to exploit all rights, as set out in our [licence](#).

The Submitting Author accepts and understands that any supply made under these terms is made by BMJ to the Submitting Author unless you are acting as an employee on behalf of your employer or a postgraduate student of an affiliated institution which is paying any applicable article publishing charge ("APC") for Open Access articles. Where the Submitting Author wishes to make the Work available on an Open Access basis (and intends to pay the relevant APC), the terms of reuse of such Open Access shall be governed by a Creative Commons licence – details of these licences and which [Creative Commons](#) licence will apply to this Work are set out in our licence referred to above.

Other than as permitted in any relevant BMJ Author's Self Archiving Policies, I confirm this Work has not been accepted for publication elsewhere, is not being considered for publication elsewhere and does not duplicate material already published. I confirm all authors consent to publication of this Work and authorise the granting of this licence.

1  
2  
3 1 **Added value of electrical impedance spectroscopy in adjunction of colposcopy: a**  
4  
5 2  
6 **prospective cohort study**  
7  
8 3  
9

10 4 Laura Bergqvist,<sup>1</sup> Annu Heinonen,<sup>1</sup> Xavier Carcopino,<sup>2</sup> Charles Redman,<sup>3</sup> Karoliina Aro,<sup>1</sup> Mari Kiviharju,<sup>1</sup> Seppo  
11 5 Virtanen,<sup>1</sup> Pirjo-Liisa Omar,<sup>1</sup> Laura Kotaniemi-Talonen,<sup>4,5</sup> Karolina Louvanto,<sup>4,5</sup> Pekka Nieminen,<sup>\*1</sup> Ilkka  
12 6 Kalliala<sup>\*1,6</sup>  
13  
14  
15 7

16  
17 8 <sup>1</sup>Department of Obstetrics and Gynecology, University of Helsinki and Helsinki University Hospital, 00029  
18 9 Helsinki, Finland

19  
20 10 <sup>2</sup>Department of Obstetrics and Gynecology, Hôpital Nord, APHM, Aix-Marseille University (AMU), Univ  
21 11 Avignon, CNRS, IRD, IMBE UMR 7263, 13397, Marseille, France

22  
23 12 <sup>3</sup>Formerly Consultant Gynecological Oncologist, University Hospital of North Midlands, Stoke-on-Trent

24  
25 13 <sup>4</sup>Department of Obstetrics and Gynecology, Faculty of Medicine and Health Technology, Tampere University,  
26 14 33100 Tampere, Finland

27  
28 15 <sup>5</sup>Department of Obstetrics and Gynecology, Tampere University Hospital, 33100 Tampere, Finland

29  
30 16 <sup>6</sup> Department of Metabolism, Digestion and Reproduction and Department of Surgery and Cancer, Faculty of  
31 17 Medicine, Imperial College London, London SW7 2AZ, UK

32  
33 18 \*Equal contribution  
34  
35 19

36  
37 20 Correspondence: Laura Bergqvist, MD; Department of Obstetrics and Gynecology, University of Helsinki and  
38 21 Helsinki University Hospital, Haartmaninkatu 2, 00290 Helsinki, Finland; fax +358947174801; e-mail  
39 22 [laura.bergqvist@hus.fi](mailto:laura.bergqvist@hus.fi)  
40  
41  
42  
43 23  
44  
45 24  
46  
47  
48 25  
49  
50 26  
51  
52 27  
53  
54  
55 28  
56  
57 29  
58  
59 30  
60

1  
2  
3 31 **Abstract (247)**  
4  
5

6 32 **Objective:** To assess whether electrical impedance spectroscopy (EIS) as an adjunctive technology enhances  
7  
8 33 the performance of colposcopy.  
9

10 34 **Design:** Prospective cohort study.  
11

12 35 **Setting:** University Hospital colposcopy clinic.  
13  
14

15 36 **Participants:** Colposcopy with EIS for 647 women and conventional colposcopy for 962 women.  
16

17 37 **Interventions:** Comparison of the performance of colposcopy by referral cervical cytology in two cohorts,  
18  
19 38 with and without EIS as an adjunctive technology.  
20

21 39 **Outcome measures:** Prevalence of cervical intraepithelial neoplasia grade 2 or worse (CIN2+), diagnostic  
22  
23 40 testing accuracy to detect CIN2+ with and without EIS and their relative differences between cohorts.  
24  
25

26 41 **Results:** The prevalence of CIN2+ varied between the cohorts according to referral cytology: 17.0% after  
27  
28 42 abnormal squamous cells of unknown significance (ASC-US) referral cytology in EIS cohort and 9.1% in the  
29  
30 43 reference cohort, 16.5% and 18.9% after low-grade squamous intraepithelial lesion (LSIL), 44.3% and 58.2%  
31  
32 44 after atypical squamous cells, cannot exclude HSIL (ASC-H), and 81.9% and 77.0% after high-grade  
33  
34 45 squamous intraepithelial lesion (HSIL) cytology, respectively. Sensitivity to detect CIN2+ was higher in the  
35  
36 46 EIS cohort, varying from 1.79 (95% CI 1.30-2.45) after LSIL referral cytology to 1.16 (95% CI 1.09-1.23) after  
37  
38 47 HSIL referral cytology, with correspondingly lower specificity after any referral cytology.  
39  
40

41  
42 48 **Conclusions:** Colposcopy with EIS had overall higher sensitivity but lower specificity to detect CIN2+ than  
43  
44 49 conventional colposcopy. CIN2+ prevalence rates were, however, not consistently higher in the EIS cohort,  
45  
46 50 suggesting innate differences between the cohorts or truly lower detection rates of CIN2+ for EIS,  
47  
48 51 highlighting the need for randomized controlled trials on the effectiveness of EIS.  
49  
50

51  
52 52 **Keywords:** Electrical impedance spectroscopy (EIS), colposcopy, cervical intraepithelial neoplasia (CIN),  
53  
54 53 cervical cytology, sensitivity, specificity  
55  
56  
57  
58 54  
59  
60

1  
2  
3 55 **Strengths and limitations of this study**  
4  
5

- 6 56 1. The performance and prevalence results of electrical impedance spectroscopy in adjunction with  
7  
8 57 colposcopy were stratified by referral cytology.  
9  
10 58 2. The results were compared to a cohort with conventional colposcopy of the same colposcopy clinic  
11  
12 59 representing similar populations.  
13  
14 60 3. The prevalence of CIN2+ was based on the first visit histological data.  
15  
16 61 4. The results offer information only in women with transformation zone type 1-2.  
17  
18  
19  
20 62  
21  
22 63  
23  
24  
25 64  
26  
27  
28 65  
29  
30  
31 66  
32  
33  
34 67  
35  
36  
37 68  
38  
39  
40 69  
41  
42  
43 70  
44  
45  
46 71  
47  
48  
49 72  
50  
51 73  
52  
53  
54 74  
55  
56  
57 75  
58  
59  
60 76

## 77 Introduction

78 During the next decades, the incidence and prevalence of high-grade cervical disease will decrease in the  
79 developed countries due to human papillomavirus (HPV) vaccination programs [1, 2] and transition to  
80 primary high-risk HPV (hrHPV)-DNA test -based screening.[3] Consequently, colposcopy will become more  
81 challenging due to resulting lower positive predictive value. Therefore, to detect those in need of  
82 treatment, it will be essential to correctly identify the high-grade lesions and take biopsies at  
83 representative locations. Also, reliable means to rule out high-grade lesions without excessive number of  
84 biopsies or frequently repeated tests or colposcopies are needed.

85 The sensitivity and specificity of colposcopy in identifying uterine cervical high-grade precancerous lesions  
86 have been previously reported to vary between 66% to 80% and 63% to 95%, respectively.[4-7]

87 Furthermore, the probability of detecting a high-grade disease at colposcopy is affected by the referral  
88 cytology, being higher after high-grade squamous intraepithelial lesion (HSIL) cytology than after atypical  
89 squamous cells of undetermined significance (ASC-US) or low-grade squamous intraepithelial lesion (LSIL)  
90 cytology results.[8]

91 ZedScan (Zillico Ltd.)[9] is a hand-held device using electrical impedance spectroscopy (EIS) in identifying  
92 cervical pathology.[10] It is designed to provide guidance to colposcopist in biopsy taking by indicating the  
93 most abnormal cervical tissue area.[10] ZedScan measures the electrical properties of the cervical  
94 epithelium to differentiate pre-cancerous and cancerous tissue from normal epithelium.[10-12] The area  
95 with the most abnormal impedance is reported visually, aiding the colposcopist in targeting biopsies.

96 The sensitivity of colposcopy has been suggested to increase with the use of EIS [10, 13-16] even in women  
97 with low probability of high-grade cervical disease and with minor colposcopic changes, as its use is  
98 independent of visual findings in colposcopy.[12, 17] The developers of the technology have been involved  
99 in most of the published studies. In women with persistent hrHPV positivity without cervical cytological  
100 changes, EIS has detected additional cases of cervical intraepithelial neoplasia grade 2 or worse (CIN2+)  
101 compared to women without EIS examination.[17] The benefit of EIS seems to vary depending on the

1  
2  
3 102 referral cervical cytology, being most useful in terms of finding extra cases of CIN2+ in women with low-  
4  
5 103 grade referral cervical cytology.[13, 14, 16] NICE guidelines recommend further research on EIS.[18]  
6  
7  
8 104 Our objective was to assess, stratified according to referral cytology, whether EIS combined with  
9  
10 105 colposcopy increases the diagnostic testing accuracy of CIN2+ compared to conventional colposcopy in  
11  
12 106 women referred to colposcopy for abnormal cervical cytology.  
13  
14

## 15 107 **Methods**

### 16 108 **Participants**

17  
18  
19 109 All women (n=1609) in this study were examined between 2013-21 at the outpatient colposcopy clinic of  
20  
21 110 Helsinki University Hospital for a new referral for abnormal cytology. We included women if their cervical  
22  
23 111 transformation zone (TZ) was type 1 or 2 (TZ1-2) and the information on both colposcopic impression and  
24  
25 112 histopathological results were available. Exclusion criteria were transformation zone type 3 (TZ3) and  
26  
27 113 pregnancy. Women referred for persistent hrHPV positivity without cytological changes were excluded due  
28  
29 114 to the lack of sufficient control cohort as high-risk HPV testing as a part of primary screening was  
30  
31 115 implemented in Helsinki region only in 2019.  
32  
33  
34  
35  
36

37  
38 116 The EIS cohort consisted of 647 women with colposcopy and ZedScan examination successfully performed  
39  
40 117 between September 2018 and August 2021. The cohort was collected prospectively with non-consecutive  
41  
42 118 patient recruitment. Under the study period ZedScan equipment was available at the colposcopy and used  
43  
44 119 at the decision of the individual colposcopist. EIS examinations were done according to the manufacturer's  
45  
46 120 protocol and all colposcopists had an adequate training prior using the device. If active bleeding during  
47  
48 121 colposcopy occurred, the EIS procedure was omitted.  
49  
50

51  
52 122 We could not directly compare the performance of colposcopy alone against colposcopy with ZedScan as  
53  
54 123 an adjunctive tool using only the EIS cohort, as these two events were not truly independent of each other  
55  
56 124 in the routine clinical setting applied here. Therefore, we used a previously collected prospective cohort of  
57  
58 125 962 patients examined with conventional colposcopy in the colposcopy clinic of Helsinki University  
59  
60



1  
2  
3 126 Hospital, Finland, between 2013 and July 2017 as the reference cohort (ISRCTN10933736),[19] with all  
4  
5 127 women fulfilling the inclusion criteria included. Only the primary colposcopy after referral and its  
6  
7 128 histological results were included in both cohorts.  
8  
9  
10 129 Abnormal cervical cytology results were categorized according to the Bethesda system as ASC-US or worse.  
11  
12 130 Histological results were reported according to WHO 2003, 2013 and 2020 classification. The evaluation of  
13  
14 131 histopathological specimens, biopsies, and large loop excision of the transformation zone (LLETZ) cones,  
15  
16 132 was done by the gynaecological histopathologists of Helsinki University Hospital. The most severe  
17  
18 133 histological diagnosis of all biopsies or LLETZ was recorded.  
19  
20  
21

### 22 134 **Clinical procedures**

23  
24  
25 135 All participants had a colposcopic examination with the application of acetic acid to the cervix.  
26  
27 136 Subsequently, participants in the EIS cohort underwent a ZedScan examination. ZedScan readings were  
28  
29 137 made from 10 to 12 points clockwise around the cervix. On the Zedscan reading, red colour points out the  
30  
31 138 area with the highest probability of high-grade disease, amber colour indicates possible high-grade areas  
32  
33 139 and the absence of high-grade disease is indicated with green colour. In the EIS cohort, cervical biopsy sites  
34  
35 140 were determined by the colposcopist based on both ZedScan results and colposcopic impression. The most  
36  
37 141 severe histological diagnosis of all biopsies was recorded.  
38  
39  
40  
41 142 Random biopsies were not routinely taken in either of the cohorts. Colposcopy examination in both cohorts  
42  
43 143 was based on Finnish Current Care Guidelines.[20] Five percent acetic acid and Lugol's iodine were  
44  
45 144 available at the discretion of individual colposcopist to assess the abnormal cervical areas for biopsy. The  
46  
47 145 colposcopic impression was recorded as high-grade, low-grade, or normal. Immediate LLETZ at initial visit  
48  
49 146 ('select and treat'-approach) was performed when evaluated necessary according to Finnish Current Care  
50  
51 147 Guidelines: HSIL referral cytology with a colposcopic impression of CIN2+ entitled to perform LLETZ at the  
52  
53 148 initial colposcopy with consent from the patient.[20] After cervical cytology with glandular atypia favouring  
54  
55 149 neoplasia (AGC-FN) the Finnish Current Care Guidelines recommends immediate LLETZ irrespective of the  
56  
57 150 age of the referred woman.[20]  
58  
59  
60

### 151 **Data analysis**

152 We compared the prevalence of histologically confirmed CIN2+ lesions between the EIS and reference  
153 cohorts and calculated the sensitivity, specificity, positive and negative predictive values for colposcopy in  
154 both cohorts for the detection of CIN2+ lesions, both overall and stratified according to the referral cervical  
155 cytology. The positive test result for EIS cohort was defined as suspected presence of CIN2+ either by  
156 ZedScan and/or via colposcopic inspection. The test result was negative if both the colposcopic impression  
157 and ZedScan agreed on low-grade lesion or normal cervical finding, i.e. absence of CIN2+ lesion. In the  
158 reference cohort, positive test result was defined as a colposcopic impression of CIN2+ while negative test  
159 result was defined as the absence of changes suggesting CIN2+ lesions. The most advanced  
160 histopathological result of the biopsies or LLETZ specimen taken at the initial visit were used as a reference  
161 standard in both cohorts. Women without biopsies and with negative ZedScan result and normal  
162 colposcopic impression as well as low-grade referral were considered true negatives. Even though  
163 colposcopy and EIS examination were not truly independent tests in the setting used, we still performed a  
164 sensitivity analysis within the EIS cohort and assessed separately diagnostic testing accuracy of colposcopy  
165 and EIS in that cohort alone as well.

166 Risk ratio and risk difference were used to compare the sensitivity and specificity between the EIS and  
167 reference cohorts. The  $p$ -values  $<0.05$  were considered statistically significant. All statistical analyses were  
168 performed using STATA/SE 15 (StataCorp, College Station TX, USA) and all statistical tests used were two-  
169 sided.

### 170 **Results**

171 There were 1027 eligible women with adequate colposcopy and Zedscan examination performed In the EIS  
172 cohort. Altogether 68 women with other referral reasons than abnormal cervical cytology, 215 women with  
173 follow-up colposcopy visits and 97 women with missing data were excluded. In total, 647 women with new  
174 colposcopy referrals of abnormal cytology were included in the analysis (Table 1). Of all ZedScan  
175 procedures 75% were conducted by three individual colposcopists. The reference cohort included 1383

1  
2  
3  
4  
5  
6  
7  
8  
9  
10  
11  
12  
13  
14  
15  
16  
17  
18  
19  
20  
21  
22  
23  
24  
25  
26  
27  
28  
29  
30  
31  
32  
33  
34  
35  
36  
37  
38  
39  
40  
41  
42  
43  
44  
45  
46  
47  
48  
49  
50  
51  
52  
53  
54  
55  
56  
57  
58  
59  
60**Table 1.** Characteristics of the electrical impedance spectroscopy (EIS) cohort and the reference cohort.

|                                   | EIS cohort     |      | Reference cohort |      |
|-----------------------------------|----------------|------|------------------|------|
|                                   | n=647          | %    | n=962            | %    |
| Mean age                          | 35.7           |      | 35.4             |      |
| Std.deviation, Range              | 9.3(20.3-76.4) |      | 9.6(19.2-67.8)   |      |
| <b>Referral cervical cytology</b> |                |      |                  |      |
| ASC-US                            | 94             | 14.5 | 99               | 10.3 |
| LSIL                              | 236            | 36.5 | 381              | 39.6 |
| ASC-H                             | 192            | 29.7 | 237              | 24.6 |
| HSIL                              | 94             | 14.5 | 200              | 20.8 |
| AGC-NOS                           | 28             | 4.3  | 28               | 2.9  |
| AGC-FN                            | 3              | 0.5  | 17               | 1.8  |
|                                   | 647            | 100  | 962              | 100  |
| <b>Age</b>                        |                |      |                  |      |
| <30 y                             | 175            | 27.0 | 295              | 30.7 |
| 30-44 y                           | 366            | 56.6 | 495              | 51.5 |
| >45 y                             | 106            | 16.4 | 172              | 17.9 |
|                                   | 647            | 100  | 962              | 100  |
| <b>TZ type</b>                    |                |      |                  |      |
| TZ type 1                         | 446            | 68.9 | 620              | 64.4 |
| TZ type 2                         | 201            | 31.1 | 342              | 35.6 |
|                                   | 647            | 100  | 962              | 100  |
| <b>Biopsies and LLETZ</b>         |                |      |                  |      |
| No biopsy                         | 22             | 3.4  | 10               | 1.0  |
| 1 biopsy                          | 165            | 25.5 | 109              | 11.3 |
| 2 biopsies                        | 263            | 40.6 | 420              | 43.7 |
| 3 biopsies                        | 83             | 12.8 | 257              | 26.7 |
| 4 biopsies                        | 1              | 0.2  | 43               | 4.5  |
| 5 biopsies                        | 0              | 0    | 5                | 0.5  |
| LLETZ                             | 113            | 17.5 | 118              | 12.3 |
|                                   | 647            | 100  | 962              | 100  |
| <b>Histology</b>                  |                |      |                  |      |
| No biopsy                         | 22             | 3.4  | 10               | 1.0  |
| Normal histology                  | 222            | 34.3 | 248              | 25.8 |
| CIN1 (LSIL)                       | 181            | 28.0 | 313              | 32.5 |
| CIN2 (HSIL)                       | 95             | 14.7 | 210              | 21.8 |
| CIN3 (HSIL)                       | 107            | 16.5 | 154              | 16.0 |
| Glandular atypia                  | 1              | 0.2  | 5                | 0.7  |
| AIS                               | 14             | 2.2  | 15               | 1.6  |
| Adenocarcinoma                    | 3              | 0.5  | 3                | 0.3  |
| Sq. cell carcinoma                | 2              | 0.3  | 4                | 0.4  |
|                                   | 647            | 100  | 962              | 100  |

Std. deviation: standard deviation; EIS: electrical impedance spectroscopy; CIN: cervical intraepithelial neoplasia; TZ: transformation zone; ASC-US: atypical squamous cells of undetermined significance; LSIL: low-grade squamous intraepithelial lesion; HSIL: high-grade squamous intraepithelial lesion; ASC-H: atypical squamous cells that cannot exclude HSIL; AGC-NOS: atypical glandular cells not otherwise specified; AGC-FN: atypical glandular cells that favor neoplasia; AIS: adenocarcinoma in situ; sq. cell carcinoma: squamous cell carcinoma; LLETZ: large loop excision of the transformation zone

1  
2  
3  
4  
5  
6  
7  
8  
9  
10  
11  
12  
13  
14  
15  
16  
17  
18  
19  
20  
21  
22  
23  
24  
25  
26  
27  
28  
29  
30  
31  
32  
33  
34  
35  
36  
37  
38  
39  
40  
41  
42  
43  
44  
45  
46  
47  
48  
49  
50  
51  
52  
53  
54  
55  
56  
57  
58  
59  
60

182 eligible women. Of these, 86 women were excluded due to other referral reasons than abnormal cervical  
183 cytology, 174 for having TZ3, 143 for missing relevant clinical data and 18 for pregnancy. As a result, a total  
184 of 962 women fulfilled the inclusion criteria (Table 1).

185 At least one biopsy was taken or imminent LLETZ made in 625 (96.6%) women in the EIS cohort and 952  
186 (99.0%) in the reference cohort. Only one biopsy was taken from one quarter of women 165 (25.5%) in the  
187 EIS cohort and among 109 (11.3%) in the reference cohort, whereas twenty-two (3.4%) women in the EIS  
188 cohort and 10 (1.0%) in the reference cohort had no biopsy. The average number of biopsies was 1.8 if at  
189 least one biopsy was taken in the EIS cohort and 2.3 in the reference cohort. (Table 1)

190 Altogether 222 (34.3%) women in the EIS cohort had CIN2+, including 5 (0.8%) cervical carcinomas and 14  
191 (2.2%) adenocarcinoma in situ cases. In the reference cohort 391 (40.6%) women had CIN2+, including 7  
192 (0.7%) cervical carcinomas and 15 (1.6%) adenocarcinoma in situ cases. (Table 1). The prevalence of CIN2+  
193 was higher in the reference cohort among those referred for LSIL or ASC-H cytology, whereas the  
194 prevalence of CIN2+ was higher in the EIS cohort after ASC-US and HSIL referral cytology (Table 2).

195 In the EIS cohort the overall sensitivity to detect CIN2+ was 94% (95% CI 90-97%) with corresponding  
196 specificity of 34% (95% CI 29-39%) (Table 2). The sensitivity varied according to referral cytology, being the  
197 lowest, 77%, for LSIL cytology (95% CI 61-89%) and the highest for HSIL cytology with 100% sensitivity (95%  
198 CI 95-100%) (Table 2). The specificity was lowest for HSIL cytology, 6% (95% CI 0-29%), and highest for ASC-  
199 US, 47% (95% CI 36-59%). EIS missed 3 low-grade referral cases of CIN2+ identified by the colposcopist (two  
200 cases if CIN2 and one CIN3). Colposcopic impression was less than CIN2 in 43 CIN2+ cases that were  
201 detected by ZedScan. A total of 13 cases (5.9%) of CIN2+ were missed by both ZedScan and the colposcopist  
202 (biopsies still taken due to suspicion of low-grade lesion), including two adenocarcinoma in situ cases and  
203 eleven high-grade lesions (nine CIN2 and two CIN3 cases).

204 In the reference cohort, the overall sensitivity to detect CIN2+ was 68% (95% CI 63-73%) with  
205 corresponding specificity of 84% (95% CI 81-87%) (Table 2). The sensitivity to detect CIN2+ by colposcopic  
206 impression of CIN2+ was the lowest after LSIL cytology, 43%, and the highest after HSIL cytology, 86%

**Table 2.** Sensitivity, specificity, negative and positive predictive value of the electrical impedance spectroscopy (EIS) cohort and the reference cohort for the detection of CIN2+ lesions by cervical cytology, TZ type and age group.

|             | EIS (n=647) |       |                                |             |         |                                 |             |            |            |         | Reference cohort (n=962) |                             |             |         |                             |             |            |           |  |
|-------------|-------------|-------|--------------------------------|-------------|---------|---------------------------------|-------------|------------|------------|---------|--------------------------|-----------------------------|-------------|---------|-----------------------------|-------------|------------|-----------|--|
|             | CIN2+/n     | CIN2% | Colpo+ZS<br>CIN2+ <sup>1</sup> | Sensitivity | <CIN2/n | Colpo +ZS<br><CIN2 <sup>3</sup> | Specificity | PPV        | NPV        | CIN2+/n | CIN2%                    | Colpo<br>CIN2+ <sup>2</sup> | Sensitivity | <CIN2/n | Colpo<br><CIN2 <sup>4</sup> | Specificity | PPV        | NPV       |  |
| ASC-US      | 16/94       | 17.0  | 15                             | 94(70-100)  | 78/94   | 37                              | 47(36-59)   | 27(16-40)  | 97(86-100) | 9/99    | 9.1                      | 5                           | 56(21-86)   | 90/99   | 87                          | 97(91-99)   | 63(25-92)  | 96(89-99) |  |
| LSIL        | 39/236      | 16.5  | 30                             | 77(61-89)   | 197/236 | 82                              | 42(35-49)   | 21(14-28)  | 90(82-95)  | 72/381  | 18.9                     | 31                          | 43(31-55)   | 309/381 | 285                         | 92(89-95)   | 56(42-70)  | 87(83-91) |  |
| ASC-H       | 85/192      | 44.3  | 84                             | 99(94-100)  | 107/192 | 12                              | 11(6-19)    | 47(39-55)  | 92(64-100) | 138/237 | 58.2                     | 87                          | 63(54-71)   | 99/237  | 64                          | 65(54-74)   | 71(62-79)  | 56(46-65) |  |
| HSIL        | 77/94       | 81.9  | 77                             | 100(95-100) | 17/94   | 1                               | 6(0-29)     | 83(74-90)  | 100(3-100) | 154/200 | 77.0                     | 133                         | 86(80-91)   | 46/200  | 21                          | 46(31-61)   | 84(78-90)  | 50(34-66) |  |
| AGC-NOS     | 3/28        | 10.7  | 2                              | 67(9-99)    | 25/28   | 11                              | 44(24-65)   | 13(2-38)   | 92(62-100) | 5/28    | 17.9                     | 3                           | 60(15-95)   | 23/28   | 22                          | 96(78-100)  | 75(19-99)  | 92(73-99) |  |
| AGC-FN      | 2/3         | 66.7  | 1                              | 50(1-99)    | 1/3     | 1                               | 100(3-100)  | 100(3-100) | 50(1-99)   | 13/17   | 76.5                     | 8                           | 62(32-86)   | 4/17    | 1                           | 25(1-81)    | 73(39-94)  | 17(0-64)  |  |
| ALL         | 222/647     | 34.3  | 209                            | 94(90-97)   | 425/647 | 144                             | 34(29-39)   | 43(38-47)  | 92(86-96)  | 391/962 | 40.6                     | 267                         | 68(63-73)   | 571/962 | 480                         | 84(81-87)   | 75(70-79)  | 80(76-83) |  |
| TZ1         | 156/446     | 35.0  | 146                            | 94(89-97)   | 290/446 | 90                              | 31(26-37)   | 42(37-48)  | 90(82-95)  | 279/620 | 45.0                     | 187                         | 67(61-73)   | 341/620 | 287                         | 84(80-88)   | 78(72-83)  | 76(71-80) |  |
| TZ2         | 66/201      | 32.8  | 63                             | 96(87-99)   | 135/201 | 54                              | 40(32-49)   | 44(36-52)  | 95(85-99)  | 112/342 | 32.7                     | 80                          | 71(62-80)   | 230/342 | 193                         | 84(79-88)   | 68(59-77)  | 86(81-90) |  |
| <30 y       | 60/175      | 34.3  | 56                             | 93(84-98)   | 115/175 | 40                              | 35(26-44)   | 43(34-52)  | 91(78-98)  | 134/295 | 45.4                     | 96                          | 72(63-79)   | 161/295 | 124                         | 77(70-83)   | 72(64-80)  | 77(69-83) |  |
| 30-44 y     | 131/366     | 35.8  | 124                            | 95(89-98)   | 235/366 | 78                              | 33(27-40)   | 44(38-50)  | 92(84-97)  | 211/495 | 42.6                     | 144                         | 68(62-75)   | 284/495 | 244                         | 86(81-90)   | 78(72-84)  | 79(74-83) |  |
| >45 y       | 31/106      | 29.2  | 29                             | 94(79-99)   | 75/106  | 26                              | 35(24-47)   | 37(27-49)  | 93(77-99)  | 46/172  | 26.7                     | 27                          | 59(43-73)   | 126/172 | 112                         | 89(82-94)   | 66(49-80)  | 86(78-91) |  |
| HG cytology | 164/289     | 56.7  | 162                            | 99(96-100)  | 125/289 | 14                              | 11(6-18)    | 59(53-65)  | 88(62-98)  | 305/454 | 67.2                     | 228                         | 75(70-80)   | 149/454 | 86                          | 58(49-66)   | 78(73-83)  | 53(45-61) |  |
| LG cytology | 58/358      | 16.2  | 47                             | 81(69-90)   | 300/358 | 130                             | 43(38-49)   | 22(16-28)  | 92(87-96)  | 86/508  | 16.9                     | 39                          | 45(35-57)   | 422/508 | 394                         | 93(91-96)   | 58(46-70)  | 89(86-92) |  |
| ASC-H, HSIL | 162/286     | 56.6  | 161                            | 99(97-100)  | 124/286 | 13                              | 11(6-17)    | 59(53-65)  | 93(66-100) | 292/437 | 66.8                     | 220                         | 75(70-80)   | 145/437 | 85                          | 59(50-67)   | 79(73-83)  | 54(46-62) |  |
| ASC-US,LSIL | 55/330      | 16.7  | 45                             | 82(69-91)   | 275/330 | 119                             | 43(37-49)   | 22(17-29)  | 92(86-96)  | 81/480  | 16.9                     | 36                          | 44(33-56)   | 399/480 | 372                         | 93(90-96)   | 57(44-70)  | 89(86-92) |  |
| Glandular   | 5/31        | 16.1  | 3                              | 60(15-95)   | 26/31   | 12                              | 46(27-67)   | 18(4-43)   | 86(57-98)  | 18/45   | 40.0                     | 11                          | 61(36-83)   | 27/45   | 23                          | 85(66-96)   | 73(45-92)  | 77(58-90) |  |
| 1 biopsy    | 11/165      | 6.7   | 7                              | 64(31-89)   | 154/165 | 78                              | 51(43-59)   | 8(4-17)    | 95(88-99)  | 14/109  | 12.8                     | 5                           | 36(13-65)   | 95/109  | 94                          | 99(94-100)  | 83(36-100) | 91(84-96) |  |
| 2 biopsies  | 78/263      | 29.7  | 70                             | 90(81-96)   | 185/263 | 43                              | 23(17-30)   | 33(27-40)  | 84(71-93)  | 112/420 | 26.7                     | 66                          | 59(49-68)   | 308/420 | 276                         | 90(86-93)   | 67(57-77)  | 86(81-89) |  |
| ≥3 biopsies | 43/84       | 51.2  | 43                             | 100         | 41/84   | 0                               | 0           | 51         | 0          | 168/305 | 55.1                     | 113                         | 67(60-74)   | 137/305 | 92                          | 67(59-75)   | 72(64-78)  | 63(54-70) |  |
| LLETZ       | 90/113      | 79.6  | 89                             | 99(94-100)  | 23/113  | 1                               | 4(0-22)     | 80(72-87)  | 50(1-99)   | 97/118  | 82.2                     | 83                          | 86(77-92)   | 21/118  | 8                           | 38(18-62)   | 87(78-93)  | 36(17-59) |  |

EIS: electrical impedance spectroscopy; CIN: cervical intraepithelial neoplasia; TZ: transformation zone; PPV: positive predictive value; NPV: negative predictive value; ASC-US: atypical squamous cells of undetermined significance; LSIL: low-grade squamous intraepithelial lesion; HSIL: high-grade squamous intraepithelial lesion; ASC-H: atypical squamous cells that cannot exclude HSIL; AGC-NOS: atypical glandular cells not otherwise specified; AGC-FN: atypical glandular cells that favor neoplasia; LLETZ: large loop excision of the transformation zone; HG: high grade; LG: low grade

<sup>1</sup>Colposcopic impression and/or ZedScan result of CIN2+ of histologically confirmed CIN2+ cases.

<sup>2</sup>Colposcopic impression of CIN2+ of histologically confirmed CIN2+ cases.

<sup>3</sup>Colposcopic impression and ZedScan result less than CIN2 of histologically confirmed cases <CIN2.

<sup>4</sup>Colposcopic impression less than CIN2 of histologically confirmed cases <CIN2

1  
2  
3  
4  
5  
6  
7  
8  
9  
10  
11  
12  
13  
14  
15  
16  
17  
18  
19  
20  
21  
22  
23  
24  
25  
26  
27  
28  
29  
30  
31  
32  
33  
34  
35  
36  
37  
38  
39  
40  
41  
42  
43  
44  
45  
46  
47  
48  
49  
50  
51  
52  
53  
54  
55  
56  
57  
58  
59  
60

216 (Figure 1, Table 2). Overall, the colposcopic impression was less than CIN2+ in 31.7% (124/391) of CIN2+  
217 cases and biopsies were taken due to suspicion of a low-grade lesion. Results stratified according to TZ  
218 type, age, and referral cytology are presented in Table S1.

219 Compared to the referral cohort, the sensitivity to detect CIN2+ was higher in the EIS cohort overall, with  
220 risk ratio (RR) of 1.38 (95% CI 1.28-1.49), and after LSIL, ASC-H and HSIL referral cervical cytologies (Table  
221 3). TZ 1 and taking two or more biopsies were associated with higher observed sensitivity (Table 3).  
222 Specificity was correspondingly lower in the EIS cohort overall as well as when stratified according to  
223 referral cytology (Table 3).

224 In the EIS cohort, colposcopic impression of high-grade disease (CIN2+) was present with EIS indicating the  
225 presence of CIN2+ in 73.4% of all histologically confirmed CIN2+ cases. In the sensitivity analysis within the  
226 EIS cohort, colposcopy alone was indicative for the presence of CIN2+ in 166 of 222 CIN2+ cases (74.8%)  
227 and ZedScan in 206 of 222 (92.8%) of CIN2+ cases, suggesting an additional 40 cases (24.1%) detected by  
228 ZedScan only. The additional cases increased the detection of CIN2+ from 30 to 44 in women with low-  
229 grade cytology and from 136 to 162 in women with high-grade cytology (Figure 1). The sensitivity to detect  
230 CIN2+ by colposcopy alone according to referral cytology was otherwise similar between the cohorts,  
231 except for women with ASC-H cervical cytology the colposcopy alone in the EIS cohort seemed to detect  
232 more CIN2+ cases (p=0.02) (Figure 1).

**Table 3.** Sensitivity and specificity of the electrical impedance spectroscopy cohort (EIS) and the reference cohort by cytology, TZ type and age group in identifying CIN2+, with corresponding risk differences and the risk ratios of sensitivity and specificity.

|             | EIS         |                       | Sensitivity                        |                       |         | EIS         |                       | Specificity                        |                       |         |
|-------------|-------------|-----------------------|------------------------------------|-----------------------|---------|-------------|-----------------------|------------------------------------|-----------------------|---------|
|             | Sensitivity | Reference Sensitivity | Risk difference (95%) <sup>1</sup> | RR (95%) <sup>1</sup> | p.      | Specificity | Reference Specificity | Risk difference (95%) <sup>1</sup> | RR (95%) <sup>1</sup> | p.      |
| ASC-US      | 94(70-100)  | 56(21-86)             | 0.38(0.04-0.73)                    | 1.69(0.93-3.07)       | 0.0219  | 47(36-59)   | 97(91-99)             | -0.49(-0.61--0.38)                 | 0.49(0.39-0.62)       | <0.0001 |
| LSIL        | 77(61-89)   | 43(31-55)             | 0.34(0.16-0.51)                    | 1.79(1.30-2.45)       | 0.0006  | 42(35-49)   | 92(89-95)             | -0.51(-0.58--0.43)                 | 0.45(0.38-0.53)       | <0.0001 |
| ASC-H       | 99(94-100)  | 63(54-71)             | 0.36(0.27-0.44)                    | 1.57(1.38-1.78)       | <0.0001 | 11(6-19)    | 65(54-74)             | -0.53(-0.65--0.42)                 | 0.17(0.10-0.30)       | <0.0001 |
| HSIL        | 100(95-100) | 86(80-91)             | 0.14(0.08-0.19)                    | 1.16(1.09-1.23)       | 0.0007  | 6(0-29)     | 46(31-61)             | -0.40(-0.58--0.22)                 | 0.13(0.02-0.89)       | 0.0033  |
| AGC-NOS     | 67(9-99)    | 60(15-95)             | 0.07(-0.62-0.75)                   | 1.11(0.38-3.25)       | 0.8504  | 44(24-65)   | 96(78-100)            | -0.52(-0.73--0.30)                 | 0.46(0.29-0.72)       | 0.0001  |
| AGC-FN      | 50(1-99)    | 62(32-86)             | -0.12(-0.86-0.63)                  | 0.81(0.19-3.47)       | 0.7565  | 100(3-100)  | 25(1-81)              | 0.75(0.33-1.17)                    | 4.0(0.73-21.84)       | 0.1709  |
| ALL         | 94(90-97)   | 68(63-73)             | 0.26(0.20-0.31)                    | 1.38(1.28-1.49)       | <0.0001 | 34(29-39)   | 84(81-87)             | -0.50(-0.56--0.45)                 | 0.40(0.35-0.46)       | <0.0001 |
| TZ1         | 94(89-97)   | 67(61-73)             | 0.27(0.20-0.33)                    | 1.40(1.27-1.53)       | <0.0001 | 31(26-37)   | 84(80-88)             | -0.53(-0.60--0.47)                 | 0.37(0.31-0.44)       | <0.0001 |
| TZ2         | 96(87-99)   | 71(62-80)             | 0.24(0.14-0.34)                    | 1.34(1.18-1.57)       | 0.0001  | 40(32-49)   | 84(79-88)             | -0.44(-0.53--0.34)                 | 0.48(0.38-0.59)       | <0.0001 |
|             |             |                       |                                    |                       | 0.0007  |             |                       |                                    |                       |         |
| <30 y       | 93(84-98)   | 72(63-79)             | 0.22(0.12-0.32)                    | 1.30(1.15-1.48)       |         | 35(26-44)   | 77(70-83)             | -0.42(-0.53--0.31)                 | 0.45(0.35-0.59)       | <0.0001 |
| 30-44 y     | 95(89-98)   | 68(62-75)             | 0.26(0.19-0.34)                    | 1.39(1.25-1.53)       | <0.0001 | 33(27-40)   | 86(81-90)             | -0.53(-0.60--0.45)                 | 0.39(0.32-0.47)       | <0.0001 |
| ≥45 y       | 94(79-99)   | 59(43-73)             | 0.35(0.18-0.52)                    | 1.59(1.23-2.07)       | 0.0008  | 35(24-47)   | 89(82-94)             | -0.54(-0.66--0.42)                 | 0.39(0.28-0.54)       | <0.0001 |
| HG cytology | 99(96-100)  | 75(70-80)             | 0.24(0.19-0.29)                    | 1.32(1.24-1.41)       | <0.0001 | 11(6-18)    | 58(49-66)             | -0.47(-0.56--0.37)                 | 0.19(0.12-0.32)       | <0.0001 |
| LG cytology | 81(69-90)   | 45(35-57)             | 0.36(0.21-0.50)                    | 1.79(1.37-2.33)       | <0.0001 | 43(38-49)   | 93(91-96)             | -0.50(-0.56--0.44)                 | 0.46(0.41-0.53)       | <0.0001 |
| 1 biopsy    | 64(31-89)   | 36(13-65)             | 0.28(-0.10-0.66)                   | 1.78(0.77-4.10)       | 0.1654  | 51(43-59)   | 99(94-100)            | -0.48(-0.56--0.40)                 | 0.51(0.44-0.60)       | <0.0001 |
| 2 biopsies  | 90(81-96)   | 59(49-68)             | 0.31(0.19-0.42)                    | 1.52(1.28-1.81)       | <0.0001 | 23(17-30)   | 90(86-93)             | -0.66(-0.73--0.59)                 | 0.26(0.20-0.34)       | <0.0001 |
| ≥3 biopsies | 100         | 67(60-74)             | 0.33(0.26-0.40)                    | 1.49(1.34-1.65)       | <0.0001 | 0           | 67(59-75)             | -0.67(-0.75--0.59)                 | 0                     | <0.0001 |

EIS: electrical impedance spectroscopy; CIN: cervical intraepithelial neoplasia; TZ: transformation zone; ASC-US: atypical squamous cells of undetermined significance; LSIL: low-grade squamous intraepithelial lesion; HSIL: high-grade squamous intraepithelial lesion; ASC-H: atypical squamous cells that cannot exclude HSIL; AGC-NOS: atypical glandular cells not otherwise specified; AGC-FN: atypical glandular cells that favor neoplasia; HG: high grade; LG: low grade

<sup>1</sup>The values of risk difference >0 or the values of risk ratio >1 imply better/improved effect with ZedScan.

## 239 Discussion

240 We compared the performance of colposcopy in detecting CIN2+ according to referral cervical cytology  
241 with and without EIS as an adjunctive technology. Colposcopy combined with EIS seemed to have a higher  
242 sensitivity, but a lower specificity compared to conventional colposcopy, regardless of the referral cervical  
243 cytology. The prevalence of CIN2+ lesions was higher in the EIS cohort after ASC-US and HSIL referral, but  
244 lower after LSIL and ASC-H cervical cytology. The average number of biopsies was lower in the EIS cohort.

245  
246 Overall, EIS performed well with a high sensitivity (94%) but had a low specificity (34%) consistent with the  
247 previous studies.[13, 14, 16] Here, the sensitivity might have been overestimated in both cohorts as the  
248 true positive result was based on histology data at first visit only and lesions missed at first visit and  
249 detected during the follow-up were not included in either cohort. Still, this would not affect the estimates  
250 of relative performance. The sensitivity (68%) and specificity (84%) of colposcopy in the reference cohort  
251 was as well in line with existing data.[5, 7, 21]

252 The increased detection of CIN2+ cases by EIS has been reported as most pronounced in women with low-  
253 grade cytology [13, 14, 16] or with high-risk HPV positivity without cytological changes.[16, 17] In our study,  
254 additional cases of CIN2+ detected by EIS were also most frequent among low-grade referrals.

255 Furthermore, the sensitivity to detect CIN2+ with EIS was higher in most cervical cytology groups (ASC-US,  
256 LSIL, ASC-H, HSIL) compared to colposcopy alone. Only within HSIL cytology EIS combined with colposcopy  
257 detected all CIN2+ cases. In women with other referral cytology (ASC-US, LSIL, ASC-H) there were cases of  
258 CIN2+ that EIS did not detect, but where biopsy of CIN2+ was warranted based on colposcopic diagnosis.

259 Nevertheless, missed cases of CIN2+ were even more frequent in the reference cohort, where more CIN2+  
260 lesions were detected in biopsies with colposcopic impression of CIN1 or lower. Contrary to expectations,  
261 the prevalence of CIN2+ was higher in EIS cohort only after ASC-US and HSIL referral cytology. One  
262 explanation for lower prevalence of CIN2+ lesions in the EIS cohort after LSIL and ASC-H cytology could be  
263 that routine practice in Finland is to take biopsies also from low-grade lesions, rather than to abstain from



1  
2  
3 264 taking biopsies when CIN2+ lesions are not colposcopically suspected. Biopsies even from mild acetowhite  
4  
5 265 lesions are important in excluding a high-grade disease as the sensitivity of colposcopy to detect CIN2+ is  
6  
7 266 far from 100%. Such biopsies could well have been more frequent without than with EIS as an additional  
8  
9  
10 267 confirmation on suspected absence of CIN2+. This is supported by the observation that two or more  
11  
12 268 biopsies were taken from 54% of women in the EIS cohort, whereas up to 75% of women in the reference  
13  
14 269 cohort had at least two biopsies. Multiple biopsies are known to increase the sensitivity of colposcopy as at  
15  
16 270 least small lesions can easily be missed.[22, 23] In women with low-grade referral cervical cytology, a single  
17  
18  
19 271 biopsy has shown to be insufficient to rule out a high-grade disease.[24] A British survey has also reported  
20  
21 272 experienced colposcopists to take mostly two biopsies in diagnosing high-grade disease.[25] The average  
22  
23 273 number of biopsies in the EIS cohort was higher (1.84) compared to previous reports (1.07 and 1.51),[23,  
24  
25 274 14] but still lower than in the reference cohort (2.3).

26  
27  
28 275 Our observation of overall fewer biopsies along with fewer CIN2+ lesions detected in the EIS cohort can  
29  
30 276 either indicate a true difference in CIN2+ prevalence between the cohorts, selection bias towards using EIS  
31  
32  
33 277 preferably on patients in whom CIN2+ lesion is not clearly present, or that CIN2+ lesions could have been  
34  
35 278 missed in the EIS cohort, especially after LSIL and ASC-H referral cytology. If lesions were missed, it could  
36  
37 279 possibly be due to a higher biopsy threshold in the EIS cohort, as indicated by lower number of biopsies.

38  
39 280 Without longitudinal data we still cannot be certain whether prevalent CIN2+ cases were indeed more  
40  
41  
42 281 frequently missed at the first visit in the EIS cohort. The prevalence of CIN2+ in EIS cohort in women with  
43  
44 282 high-grade cytology (ASC-H and HSIL) is below previous observations (56.6% vs. 79.1-84.0%).[13, 16]  
45  
46 283 However, when restricted to only women with HSIL referral cervical cytology or low-grade (ASC-US and  
47  
48 284 LSIL) cytology, the prevalence for CIN2+ here did not differ from previous reports.[13, 16] Cytological  
49  
50  
51 285 diagnoses may well vary between cytopathologists as well as between countries and this possible  
52  
53 286 difference in classification might also explain the observed difference in CIN2+ prevalence, especially after  
54  
55 287 ASC-H cytology.[26] The longitudinal data on EIS results are scarce. In women referred with low-grade  
56  
57 288 cytology, the future risk of CIN2+ was increased in up to 36 months follow-up if both colposcopic  
58  
59 289 impression and EIS results were indicative for CIN2+ compared with women with other combinations of

1  
2  
3 290 these two parameters, suggesting that EIS might provide new information on the future risk of high-grade  
4  
5 291 disease.[27]  
6  
7

## 8 292 **Strengths and limitations**

9

10  
11 293 Most previous studies have compared the performance of EIS as an adjunctive technology for colposcopy  
12  
13 294 against conventional colposcopy within the cohort where EIS was used, even though in clinical setting EIS is  
14  
15 295 not a truly independent measurement from colposcopy. To our knowledge this is the first report on the  
16  
17  
18 296 performance of EIS as an adjunctive technology for colposcopy stratified according to referral cytology and  
19  
20 297 compared to an external reference cohort. Even though our cohorts were collected at different time  
21  
22 298 periods, they both represent women in the same catchment area referred to colposcopy due to abnormal  
23  
24 299 cervical cytology. All colposcopies were performed in the same clinic by experienced colposcopists.  
25  
26  
27 300 Furthermore, none of the authors of this work have financial conflicts of interest with the technology  
28  
29 301 studied. Our study also has some limitations. When the cervical transformation zone is not fully visible, TZ  
30  
31 302 type 3, ZedScan technology cannot be reliably applied and the results are not applicable to this population.  
32  
33 303 CIN2+ lesions could well have been missed in both cohorts since the results are based on data collected on  
34  
35 304 the initial visit. However, complete certainty of the histology would have required LLETZ for all participants  
36  
37  
38 305 which would not have been ethically just.  
39  
40

## 41 306 **Conclusions**

42

43  
44 307 Colposcopy with EIS has a higher sensitivity and a lower specificity in identifying CIN2+ compared to  
45  
46 308 conventional colposcopy, irrespective of cervical cytology. EIS can, therefore, be assumed to be of clinical  
47  
48 309 benefit in colposcopy, particularly in women with low-grade cervical cytology where the prevalence of  
49  
50 310 CIN2+ is low. We also observed an overall lower prevalence of CIN2+ lesions in the EIS cohort compared to  
51  
52  
53 311 a reference cohort with conventional colposcopy. The performance of EIS as an adjunctive technology for  
54  
55 312 colposcopy has not been previously compared by cytology to an external reference cohort. While the  
56  
57 313 observation of lower CIN2+ rate could be explained by different CIN2+ prevalence between the cohorts or  
58  
59 314 selection bias, the finding is important and warrants further research, especially along with the observed  
60

1  
2  
3 315 lower number of biopsies in the EIS cohort. Adjunctive technologies are likely to become increasingly  
4  
5 316 appealing in colposcopy, as the prevalence of high-grade cervical lesions is declining. Randomised  
6  
7 317 controlled trials comparing EIS with a conventional colposcopy, including women referred due to persistent  
8  
9  
10 318 HPV infection without cytological changes are warranted. Before such further evidence, firm  
11  
12 319 recommendations on applicability of EIS as an adjunctive technology for colposcopy cannot be made.  
13  
14

15 320 **Figure 1.** Numbers and rates of CIN2+ lesions detected in the electrical impedance spectroscopy cohort  
16  
17 321 (EIS) and in the reference cohort according to referral cytology. (A) Numbers and rates of CIN2+ detected  
18  
19 322 by ZedScan alone and reference cohort stratified according to referral cytology (B) Numbers and rates of  
20  
21 323 CIN2+ detected by colposcopy alone in EIS and reference cohorts stratified according to referral cytology.  
22  
23  
24 324 Numbers of patients are given in the columns.  
25  
26

#### 27 325 **Contributors**

28  
29  
30 326 PN and IK were responsible for the conceptualisation and design of the study as well as methodology. XC,  
31  
32 327 KL, LKT contributed to conceptualisation. LB performed the statistical analysis with the aid of IK. LB, PN,  
33  
34 328 MK, PLO, SV and AH were responsible for data collection. LB drafted the original manuscript and IK, PN, CR,  
35  
36 329 XC, KL, LKT, AH and KA participated in writing, reviewing and editing. All authors listed qualify for  
37  
38  
39 330 authorship and approved the final version of the paper.  
40

#### 41 331 **Funding**

42  
43  
44  
45 332 This work was supported by the Academy of Finland (IK), the Finnish Medical Foundation (IK), and Finnish  
46  
47 333 State Research Funding (IK).  
48  
49

50  
51 334 **Competing interests** None declared.  
52  
53

54 335 **Patient and public involvement** Patients and/or the public were not involved in the design, or conduct, or  
55  
56 336 reporting, or dissemination plans of this research.  
57  
58

59 337 **Patient consent for publication** Not required.  
60

1  
2  
3  
4  
5  
6  
7  
8  
9  
10  
11  
12  
13  
14  
15  
16  
17  
18  
19  
20  
21  
22  
23  
24  
25  
26  
27  
28  
29  
30  
31  
32  
33  
34  
35  
36  
37  
38  
39  
40  
41  
42  
43  
44  
45  
46  
47  
48  
49  
50  
51  
52  
53  
54  
55  
56  
57  
58  
59  
60

338 **Ethics approval** This study and data collection on patients where EIS was used was considered as a service  
339 evaluation and therefore a separate ethical approval was not required as per consultation with Helsinki-  
340 Uusimaa Hospital District Ethical Committee. For the historical reference cohort an ethical approval was  
341 received from Helsinki-Uusimaa Hospital District Ethical Committee (ref. no. 130/13/03/03/2013).

342 **Data availability statement** Data are available upon reasonable request.

For peer review only

1  
2  
3  
4  
5  
6  
7  
8  
9  
10  
11  
12  
13  
14  
15  
16  
17  
18  
19  
20  
21  
22  
23  
24  
25  
26  
27  
28  
29  
30  
31  
32  
33  
34  
35  
36  
37  
38  
39  
40  
41  
42  
43  
44  
45  
46  
47  
48  
49  
50  
51  
52  
53  
54  
55  
56  
57  
58  
59  
60**References:**

- 1 Munro A, Gillespie C, Cotton S, et al. The impact of human papillomavirus type on colposcopy performance in women offered HPV immunisation in a catch-up vaccine programme: a two-centre observational study. *BJOG* 2017;124(9):1394–401.
- 2 Lehtinen M, Pimenoff VN, Nedjai B, et al. Assessing the risk of cervical neoplasia in the post-HPV vaccination era. *Int J Cancer* 2022;(June):1–9.
- 3 Rebolj M, Rimmer J, Denton K, et al. Primary cervical screening with high risk human papillomavirus testing: Observational study. *BMJ* 2019;364:l240.
- 4 Zuchna C, Hager M, Tringler B, et al. Diagnostic accuracy of guided cervical biopsies: A prospective multicenter study comparing the histopathology of simultaneous biopsy and cone specimen. *Am J Obstet Gynecol* 2010;203(4):321.e1-321.e6. Available: <http://dx.doi.org/10.1016/j.ajog.2010.05.033>
- 5 Cantor SB, Cárdenas-Turanzas M, Cox DD, et al. Accuracy of colposcopy in the diagnostic setting compared with the screening setting. *Obstet Gynecol* 2008;111(1):7–14.
- 6 Underwood M, Arbyn M, Parry-Smith W, et al. Accuracy of colposcopy-directed punch biopsies: a systematic review and meta-analysis. *BJOG* 2012;119(11):1293–1301.
- 7 Brown BH, Tidy JA. The diagnostic accuracy of colposcopy – A review of research methodology and impact on the outcomes of quality assurance. *Eur J of Obstet Gynecol Repro Biol* 2019;240(2019):182–6. Available: <https://doi.org/10.1016/j.ejogrb.2019.07.003>
- 8 Demarco M, Lorey TS, Fetterman B, et al. Risks of CIN 2 +, CIN 3 +, and Cancer by Cytology and Human Papillomavirus Status: The Foundation of Risk-Based Cervical Screening Guidelines. *J Low Genit Tract Dis* 2017;21(4):261–7.
- 9 Zilico Ltd. Manchester: Available: <https://zilico.co.uk>
- 10 Tidy JA, Brown BH, Healey TJ, et al. Accuracy of detection of high-grade cervical intraepithelial neoplasia using electrical impedance spectroscopy with colposcopy. *BJOG* 2013;120(4):400–11.

1  
2  
3  
4  
5  
6  
7  
8  
9  
10  
11  
12  
13  
14  
15  
16  
17  
18  
19  
20  
21  
22  
23  
24  
25  
26  
27  
28  
29  
30  
31  
32  
33  
34  
35  
36  
37  
38  
39  
40  
41  
42  
43  
44  
45  
46  
47  
48  
49  
50  
51  
52  
53  
54  
55  
56  
57  
58  
59  
60

- 11 Brown BH, Tidy JA, Boston K, et al. Relation between tissue structure and imposed electrical current flow in cervical neoplasia. *The Lancet* 2000 Mar 11;355(9207):892–5. Available: [https://doi.org/10.1016/S0140-6736\(99\)09095-9](https://doi.org/10.1016/S0140-6736(99)09095-9)
- 12 Balasubramani L, Brown BH, Healey J, et al. The detection of cervical intraepithelial neoplasia by electrical impedance spectroscopy: The effects of acetic acid and tissue homogeneity. *Gynecol Oncol* 2009;115(2):267–71. Available: <http://dx.doi.org/10.1016/j.ygyno.2009.08.010>
- 13 Tidy JA, Brown BH, Lyon RE, et al. Are colposcopy and electrical impedance spectroscopy complementary when used to detect high-grade cervical neoplasia? *Eur J Gynaecol Oncol* 2018;39(1):70–5.
- 14 Muszynski C, Dupont E, Vaysse B, et al. The impact of using electrical impedance spectroscopy (ZedScan) on the performance of colposcopy in diagnosing high grade squamous lesions of the cervix. *J Gynecol Obstet Hum Reprod* 2017;46(9):669–73. Available: <http://dx.doi.org/10.1016/j.jogoh.2017.08.007>
- 15 Homola W, Fuchs T, Baranski P, et al. Use of electrical impedance spectroscopy as an adjunct to colposcopy in a pathway of cervical intraepithelial neoplasia diagnostics. *Ginekol Pol* 2019;90(11):628–32.
- 16 Tidy JA, Brown BH. Increased detection of high grade CIN, when using electrical impedance spectroscopy as an adjunct to routine colposcopy, is maintained when used across international boundaries: Prospective data from nine European countries. *Eur J Obstet and Gynecol Repro Biol* 2022;275(May):41–5. Available: <https://doi.org/10.1016/j.ejogrb.2022.05.025>
- 17 Tidy JA, Lyon R, Ellis K, et al. The impact of age and high-risk human papillomavirus (hrHPV) status on the prevalence of high-grade cervical intraepithelial neoplasia (CIN2+) in women with persistent hrHPV-positive, cytology-negative screening samples: a prospective cohort study. *BJOG* 2020;127(10):1260–7.
- 18 National Institute for Health and Care Excellence. NICE Adjunctive colposcopy technologies for assessing suspected cervical abnormalities: the DYSIS colposcope with DYSISmap and the Zedscan I. 2018. Available: <https://www.nice.org.uk/guidance/dg32> [Accessed 22 Jan 2022].

- 1  
2  
3 409 19 Aro K, Nieminen P, Louvanto K, et al. Gynecologic Oncology Age-specific HPV type distribution in high-  
4  
5 410 grade cervical disease in screened and unvaccinated women. *Gynecol Oncol* 2019;154(2):354–9.  
6  
7 411 Available: <https://doi.org/10.1016/j.ygyno.2019.05.024>  
8  
9  
10 412 20 Working group set up by the Finnish Medical Society Duodecim and the Finnish Colposcopy Association.  
11  
12 413 Cytological Changes in the Cervix, Vagina and Vulva. Current Care Guidelines. The Finnish Medical  
13  
14 414 Society Duodecim, 2021. Available: [www.kaypahoito.fi](http://www.kaypahoito.fi) [Accessed 17 Jan 2022].  
15  
16 415 21 van der Marel J, van Baars R, Quint WGV, et al. The impact of human papillomavirus genotype on  
17  
18 416 colposcopic appearance: A cross-sectional analysis. *BJOG* 2014;121(9):1117–26.  
19  
20  
21 417 22 Pretorius RG, Belinson JL, Burchette RJ, et al. Regardless of skill, performing more biopsies increases the  
22  
23 418 sensitivity of colposcopy. *J Low Genit Tract Dis* 2011;15(3):180–8.  
24  
25 419 23 Wentzensen N, Walker JL, Gold MA, et al. Multiple biopsies and detection of cervical cancer precursors  
26  
27 420 at colposcopy. *J Clin Oncol* 2015;33(1):83–9.  
28  
29  
30 421 24 Moss EL, Hadden P, Douce G, et al. Is the colposcopically directed punch biopsy a reliable diagnostic  
31  
32 422 test in women with minor cytological lesions? *J Low Genit Tract Dis* 2012;16(4):421–6.  
33  
34 423 25 Myriokefalitaki E, Redman CWE, Potdar N, et al. The Use of the Colposcopically Directed Punch Biopsy  
35  
36 424 in Clinical Practice: A Survey of British Society of Colposcopy and Cervical Pathology (BSCCP)-Accredited  
37  
38 425 Colposcopists. *J Low Genit Tract Dis* 2016;20(3):234–8.  
39  
40  
41 426 26 Sherman ME, Castle PE, Solomon D. Cervical cytology of atypical squamous cells-cannot exclude high-  
42  
43 427 grade squamous intraepithelial lesion (ASC-H): Characteristics and histologic outcomes. *Cancer* 2006  
44  
45 428 Oct 25;108(5):298–305.  
46  
47  
48 429 27 Brown BH, Highfield PE, Tidy JA. Prognostic value of electrical impedance spectroscopy (EIS) when used  
49  
50 430 as an adjunct to colposcopy - A longitudinal study. *J Electr Bioimp* 2020;11(1):81–6.  
51  
52  
53  
54  
55  
56  
57  
58  
59  
60

(A)

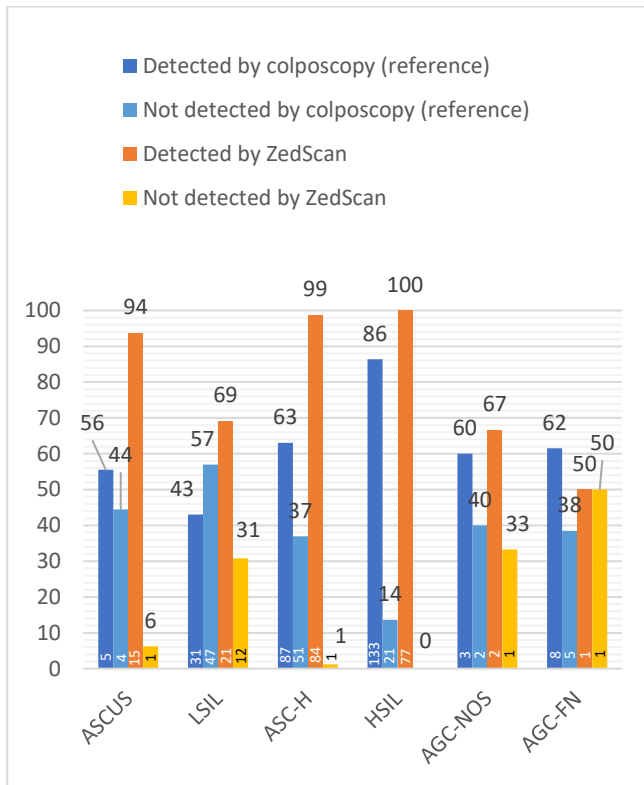

(B)

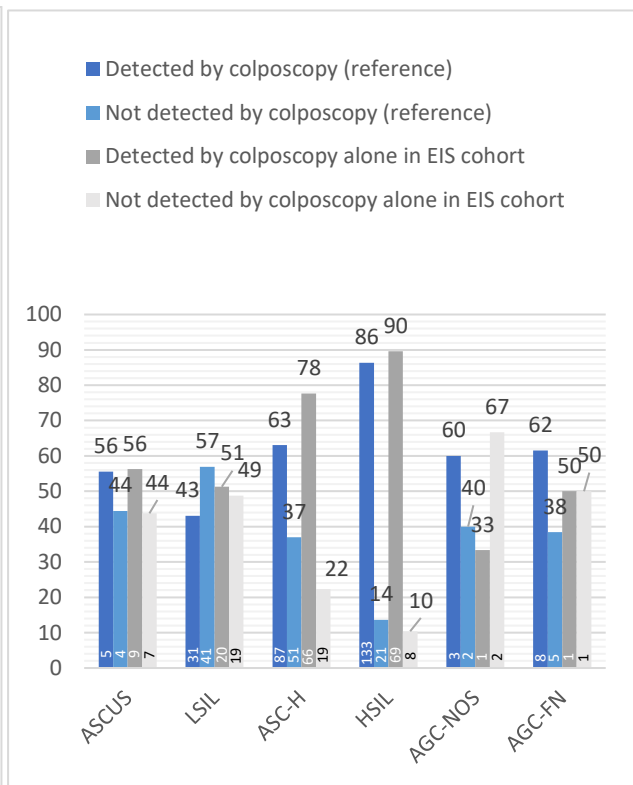

review only



**Table S1.** Sensitivity, specificity, positive and negative predictive value of the electrical impedance spectroscopy (EIS) cohort and the reference cohort for the detection of CIN2+ lesions within different cervical cytology by TZ type and age group.

|         | EIS cohort (n=647)    |       |             |                       |       |             |                    |             |         | Reference cohort (n=962) |             |         |       |             |             |             |
|---------|-----------------------|-------|-------------|-----------------------|-------|-------------|--------------------|-------------|---------|--------------------------|-------------|---------|-------|-------------|-------------|-------------|
|         | Colpo+ZS <sup>1</sup> |       |             | Colpo+ZS <sup>3</sup> |       |             | Colpo <sup>2</sup> |             |         | Colpo <sup>4</sup>       |             |         |       |             |             |             |
|         | CIN2+/n               | CIN2+ | Sensitivity | <CIN/n                | <CIN2 | Specificity | PPV                | NPV         | CIN2+/n | CIN2+                    | Sensitivity | <CIN2/n | <CIN2 | Specificity | PPV         | NPV         |
| ASC-US  | 16/94                 | 15    | 94(70-100)  | 78/94                 | 37    | 47(36-59)   | 27(16-40)          | 97(86-100)  | 9/99    | 5                        | 56(21-86)   | 90/99   | 87    | 97(91-99)   | 63(25-92)   | 96(89-99)   |
| TZ1     | 11/66                 | 10    | 91(59-100)  | 55/66                 | 24    | 44(30-58)   | 24(12-40)          | 96(80-100)  | 7/57    | 3                        | 43(10-82)   | 50/57   | 47    | 94(84-99)   | 50(12-88)   | 92(81-98)   |
| TZ2     | 5/28                  | 5     | 100(48-100) | 23/28                 | 13    | 57(35-77)   | 33(12-62)          | 100(75-100) | 2/42    | 2                        | 100(16-100) | 40/42   | 40    | 100(91-100) | 100(16-100) | 100(91-100) |
| <30 y   | 6/28                  | 5     | 83(36-100)  | 22/28                 | 12    | 55(32-76)   | 33(12-62)          | 92(64-100)  | 1/43    | 0                        | 0(0-98)     | 42/43   | 39    | 93(81-99)   | 0(0-71)     | 98(87-100)  |
| 30-44 y | 10/52                 | 10    | 100(69-100) | 42/52                 | 21    | 50(34-66)   | 32(17-51)          | 100(84-100) | 7/28    | 4                        | 57(18-90)   | 21/28   | 21    | 100(84-100) | 100(40-100) | 88(68-97)   |
| >45 y   | 0/14                  | 0     | 0           | 14/14                 | 4     | 29          | 0                  | 100         | 1/28    | 1                        | 100(3-100)  | 27/28   | 27    | 100(87-100) | 100(3-100)  | 100(87-100) |
| LSIL    | 39/236                | 30    | 77(61-89)   | 197/236               | 82    | 42(35-49)   | 21(14-28)          | 90(82-95)   | 72/381  | 31                       | 43(31-55)   | 309/381 | 285   | 92(89-95)   | 56(42-70)   | 87(83-91)   |
| TZ1     | 26/157                | 20    | 77(56-91)   | 131/157               | 53    | 41(32-49)   | 20(13-30)          | 90(79-96)   | 53/235  | 23                       | 43(30-58)   | 182/235 | 169   | 93(88-96)   | 64(46-79)   | 85(79-90)   |
| TZ2     | 13/79                 | 10    | 77(46-95)   | 66/79                 | 29    | 44(32-57)   | 21(11-36)          | 91(75-98)   | 19/146  | 8                        | 42(20-67)   | 127/146 | 116   | 91(85-96)   | 42(20-67)   | 91(85-96)   |
| <30 y   | 4/39                  | 1     | 25(1-81)    | 35/39                 | 21    | 60(42-76)   | 7(0-32)            | 88(68-97)   | 17/79   | 9                        | 53(28-77)   | 62/79   | 54    | 87(76-94)   | 53(28-77)   | 87(76-94)   |
| 30-44 y | 28/153                | 24    | 86(67-96)   | 125/153               | 46    | 37(28-46)   | 23(16-33)          | 92(81-98)   | 46/224  | 19                       | 41(27-57)   | 178/224 | 166   | 93(89-97)   | 61(42-78)   | 86(80-91)   |
| >45 y   | 7/44                  | 5     | 71(29-96)   | 37/44                 | 15    | 41(25-58)   | 19(6-38)           | 88(64-99)   | 9/78    | 3                        | 33(8-70)    | 69/78   | 65    | 94(86-98)   | 43(10-82)   | 92(83-97)   |
| ASC-H   | 85/192                | 84    | 99(94-100)  | 107/192               | 12    | 11(6-19)    | 47(39-55)          | 92(64-100)  | 138/237 | 87                       | 63(54-71)   | 99/237  | 64    | 65(54-74)   | 71(62-79)   | 56(46-65)   |
| TZ1     | 57/134                | 56    | 98(91-100)  | 77/134                | 6     | 8(3-16)     | 44(35-53)          | 86(42-100)  | 100/167 | 64                       | 64(54-73)   | 67/167  | 42    | 63(50-74)   | 72(61-81)   | 54(42-65)   |
| TZ2     | 28/58                 | 28    | 100(88-100) | 30/58                 | 6     | 20(8-39)    | 54(40-68)          | 100(54-100) | 38/70   | 23                       | 61(43-76)   | 32/70   | 22    | 69(50-84)   | 70(51-84)   | 60(42-75)   |
| <30 y   | 24/72                 | 24    | 100(86-100) | 48/72                 | 5     | 10(4-23)    | 36(25-49)          | 100(48-100) | 57/90   | 34                       | 60(46-72)   | 33/90   | 18    | 55(36-72)   | 69(55-82)   | 44(29-60)   |
| 30-44 y | 46/90                 | 45    | 98(89-100)  | 44/90                 | 4     | 9(3-22)     | 53(42-64)          | 80(28-100)  | 67/120  | 45                       | 67(55-78)   | 53/120  | 37    | 70(56-82)   | 74(61-84)   | 63(49-75)   |
| >45 y   | 15/30                 | 15    | 100(78-100) | 15/30                 | 3     | 20(4-48)    | 56(35-75)          | 100(29-100) | 14/27   | 8                        | 57(29-82)   | 13/27   | 9     | 69(39-91)   | 67(35-90)   | 60(32-84)   |
| HSIL    | 77/94                 | 77    | 100(95-100) | 17/94                 | 1     | 6(0-29)     | 83(74-90)          | 100(3-100)  | 154/200 | 133                      | 86(80-91)   | 46/200  | 21    | 46(31-61)   | 84(78-90)   | 50(34-66)   |
| TZ1     | 58/67                 | 58    | 100         | 9/67                  | 0     | 0           | 87                 | 0           | 104/131 | 88                       | 85(76-91)   | 27/131  | 15    | 56(35-75)   | 88(80-94)   | 48(30-67)   |
| TZ2     | 19/27                 | 19    | 100(82-100) | 8/27                  | 1     | 13(0-53)    | 73(52-88)          | 100(3-100)  | 50/69   | 45                       | 90(78-97)   | 19/69   | 6     | 32(13-57)   | 78(65-88)   | 55(23-83)   |
| <30 y   | 25/31                 | 25    | 100         | 6/31                  | 0     | 0           | 81                 | 0           | 54/75   | 48                       | 89(77-96)   | 21/75   | 10    | 48(26-70)   | 81(69-90)   | 63(35-85)   |
| 30-44 y | 45/54                 | 45    | 100(92-100) | 9/54                  | 1     | 11(0-48)    | 85(72-93)          | 100(3-100)  | 84/102  | 72                       | 86(76-92)   | 18/102  | 9     | 50(26-74)   | 89(80-95)   | 43(22-66)   |
| >45 y   | 7/9                   | 7     | 100         | 2/9                   | 0     | 0           | 78                 | 0           | 16/23   | 13                       | 81(54-96)   | 7/23    | 2     | 29(4-71)    | 72(47-90)   | 40(5-85)    |

EIS: electrical impedance spectroscopy; CIN: cervical intraepithelial neoplasia; TZ: transformation zone; PPV: positive predictive value; NPV: negative predictive value; ASC-US: atypical squamous cells of undetermined significance; LSIL: low-grade squamous intraepithelial lesion; HSIL: high-grade squamous intraepithelial lesion; ASC-H: atypical squamous cells that cannot exclude HSIL; AGC-NOS: atypical glandular cells not otherwise specified; AGC-FN: atypical glandular cells that favor neoplasia; LLETZ: large loop excision of the transformation zone; HG: high grade; LG: low grade

<sup>1</sup>Colposcopic impression and/or ZedScan result of CIN2+ of histologically confirmed CIN2+ cases.

<sup>2</sup>Colposcopic impression of CIN2+ of histologically confirmed CIN2+ cases.

<sup>3</sup>Colposcopic impression and ZedScan result less than CIN2 of histologically confirmed cases <CIN2.

<sup>4</sup>Colposcopic impression less than CIN2 of histologically confirmed cases <CIN2

1  
2  
3  
4  
5  
6  
7  
8  
9  
10  
11  
12  
13  
14  
15  
16  
17  
18  
19  
20  
21  
22  
23  
24  
25  
26  
27  
28  
29  
30  
31  
32  
33  
34  
35  
36  
37  
38  
39  
40  
41  
42  
43  
44  
45  
46  
47  
48  
49  
50  
51  
52  
53  
54  
55  
56  
57  
58  
59  
60

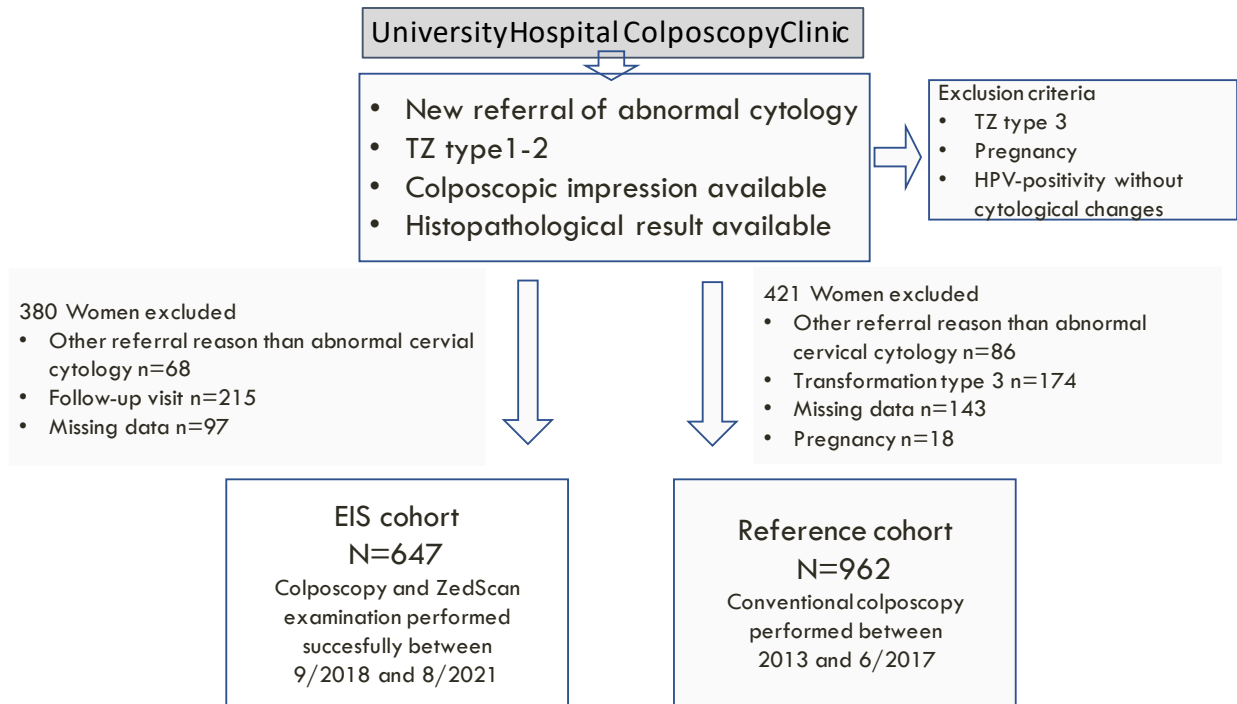

Figure S1. Flow-chart of the study comparing the performance of colposcopy by referral cervical cytology in two cohorts with and without electrical impedance spectroscopy as an adjunctive technology.

| Section & Topic          | No  | Item                                                                                                                                                                                   | Reported on page #                      |
|--------------------------|-----|----------------------------------------------------------------------------------------------------------------------------------------------------------------------------------------|-----------------------------------------|
| <b>TITLE OR ABSTRACT</b> |     |                                                                                                                                                                                        |                                         |
|                          | 1   | Identification as a study of diagnostic accuracy using at least one measure of accuracy (such as sensitivity, specificity, predictive values, or AUC)                                  | 2                                       |
| <b>ABSTRACT</b>          |     |                                                                                                                                                                                        |                                         |
|                          | 2   | Structured summary of study design, methods, results, and conclusions (for specific guidance, see STARD for Abstracts)                                                                 | 2                                       |
| <b>INTRODUCTION</b>      |     |                                                                                                                                                                                        |                                         |
|                          | 3   | Scientific and clinical background, including the intended use and clinical role of the index test                                                                                     | 4                                       |
|                          | 4   | Study objectives and hypotheses                                                                                                                                                        | 4                                       |
| <b>METHODS</b>           |     |                                                                                                                                                                                        |                                         |
| <i>Study design</i>      | 5   | Whether data collection was planned before the index test and reference standard were performed (prospective study) or after (retrospective study)                                     | 5                                       |
| <i>Participants</i>      | 6   | Eligibility criteria                                                                                                                                                                   | 5-6                                     |
|                          | 7   | On what basis potentially eligible participants were identified (such as symptoms, results from previous tests, inclusion in registry)                                                 | 5                                       |
|                          | 8   | Where and when potentially eligible participants were identified (setting, location and dates)                                                                                         | 5-6                                     |
|                          | 9   | Whether participants formed a consecutive, random or convenience series                                                                                                                | 5-6                                     |
| <i>Test methods</i>      | 10a | Index test, in sufficient detail to allow replication                                                                                                                                  | 6                                       |
|                          | 10b | Reference standard, in sufficient detail to allow replication                                                                                                                          | 6                                       |
|                          | 11  | Rationale for choosing the reference standard (if alternatives exist)                                                                                                                  | 5-6                                     |
|                          | 12a | Definition of and rationale for test positivity cut-offs or result categories of the index test, distinguishing pre-specified from exploratory                                         | 7                                       |
|                          | 12b | Definition of and rationale for test positivity cut-offs or result categories of the reference standard, distinguishing pre-specified from exploratory                                 | 7                                       |
|                          | 13a | Whether clinical information and reference standard results were available to the performers/readers of the index test                                                                 | 6                                       |
|                          | 13b | Whether clinical information and index test results were available to the assessors of the reference standard                                                                          | 5-6                                     |
| <i>Analysis</i>          | 14  | Methods for estimating or comparing measures of diagnostic accuracy                                                                                                                    | 7                                       |
|                          | 15  | How indeterminate index test or reference standard results were handled                                                                                                                | 5-6                                     |
|                          | 16  | How missing data on the index test and reference standard were handled                                                                                                                 | 5-6                                     |
|                          | 17  | Any analyses of variability in diagnostic accuracy, distinguishing pre-specified from exploratory                                                                                      | 7                                       |
|                          | 18  | Intended sample size and how it was determined                                                                                                                                         | 5-6                                     |
| <b>RESULTS</b>           |     |                                                                                                                                                                                        |                                         |
| <i>Participants</i>      | 19  | Flow of participants, using a diagram                                                                                                                                                  | Figure S1, submitted as a separate file |
|                          | 20  | Baseline demographic and clinical characteristics of participants                                                                                                                      | 8, Table 1                              |
|                          | 21a | Distribution of severity of disease in those with the target condition                                                                                                                 | 8, Table 1                              |
|                          | 21b | Distribution of alternative diagnoses in those without the target condition                                                                                                            | 8, Table 1                              |
|                          | 22  | Time interval and any clinical interventions between index test and reference standard                                                                                                 | 5-6                                     |
| <i>Test results</i>      | 23  | Cross tabulation of the index test results (or their distribution) by the results of the reference standard                                                                            | 8,10,12 Table1-3                        |
|                          | 24  | Estimates of diagnostic accuracy and their precision (such as 95% confidence intervals)                                                                                                | 10,12 Table 2-3                         |
|                          | 25  | Any adverse events from performing the index test or the reference standard                                                                                                            | NA                                      |
| <b>DISCUSSION</b>        |     |                                                                                                                                                                                        |                                         |
|                          | 26  | Study limitations, including sources of potential bias, statistical uncertainty, and generalisability                                                                                  | 13-15                                   |
|                          | 27  | Implications for practice, including the intended use and clinical role of the index test                                                                                              | 15-16                                   |
| <b>OTHER INFORMATION</b> |     |                                                                                                                                                                                        |                                         |
|                          | 28  | Registration number and name of registry<br>For peer review only - <a href="http://bmjopen.bmj.com/site/about/guidelines.xhtml">http://bmjopen.bmj.com/site/about/guidelines.xhtml</a> | 6 ISRCTN for the reference cohort       |

|   |           |                                                       |                              |
|---|-----------|-------------------------------------------------------|------------------------------|
| 1 | <b>29</b> | Where the full study protocol can be accessed         | Submitted as a separate file |
| 2 |           |                                                       |                              |
| 3 | <b>30</b> | Sources of funding and other support; role of funders | 16                           |
| 4 |           |                                                       |                              |

5  
6  
7  
8  
9  
10  
11  
12  
13  
14  
15  
16  
17  
18  
19  
20  
21  
22  
23  
24  
25  
26  
27  
28  
29  
30  
31  
32  
33  
34  
35  
36  
37  
38  
39  
40  
41  
42  
43  
44  
45  
46  
47  
48  
49  
50  
51  
52  
53  
54  
55  
56  
57  
58  
59  
60

For peer review only

# STARD 2015

---

## AIM

STARD stands for “Standards for Reporting Diagnostic accuracy studies”. This list of items was developed to contribute to the completeness and transparency of reporting of diagnostic accuracy studies. Authors can use the list to write informative study reports. Editors and peer-reviewers can use it to evaluate whether the information has been included in manuscripts submitted for publication.

---

## EXPLANATION

A **diagnostic accuracy study** evaluates the ability of one or more medical tests to correctly classify study participants as having a **target condition**. This can be a disease, a disease stage, response or benefit from therapy, or an event or condition in the future. A medical test can be an imaging procedure, a laboratory test, elements from history and physical examination, a combination of these, or any other method for collecting information about the current health status of a patient.

The test whose accuracy is evaluated is called **index test**. A study can evaluate the accuracy of one or more index tests. Evaluating the ability of a medical test to correctly classify patients is typically done by comparing the distribution of the index test results with those of the **reference standard**. The reference standard is the best available method for establishing the presence or absence of the target condition. An accuracy study can rely on one or more reference standards.

If test results are categorized as either positive or negative, the cross tabulation of the index test results against those of the reference standard can be used to estimate the **sensitivity** of the index test (the proportion of participants *with* the target condition who have a positive index test), and its **specificity** (the proportion *without* the target condition who have a negative index test). From this cross tabulation (sometimes referred to as the contingency or “2x2” table), several other accuracy statistics can be estimated, such as the positive and negative **predictive values** of the test. Confidence intervals around estimates of accuracy can then be calculated to quantify the statistical **precision** of the measurements.

If the index test results can take more than two values, categorization of test results as positive or negative requires a **test positivity cut-off**. When multiple such cut-offs can be defined, authors can report a receiver operating characteristic (ROC) curve which graphically represents the combination of sensitivity and specificity for each possible test positivity cut-off. The **area under the ROC curve** informs in a single numerical value about the overall diagnostic accuracy of the index test.

The **intended use** of a medical test can be diagnosis, screening, staging, monitoring, surveillance, prediction or prognosis. The **clinical role** of a test explains its position relative to existing tests in the clinical pathway. A replacement test, for example, replaces an existing test. A triage test is used before an existing test; an add-on test is used after an existing test.

Besides diagnostic accuracy, several other outcomes and statistics may be relevant in the evaluation of medical tests. Medical tests can also be used to classify patients for purposes other than diagnosis, such as staging or prognosis. The STARD list was not explicitly developed for these other outcomes, statistics, and study types, although most STARD items would still apply.

---

## DEVELOPMENT

This STARD list was released in 2015. The 30 items were identified by an international expert group of methodologists, researchers, and editors. The guiding principle in the development of STARD was to select items that, when reported, would help readers to judge the potential for bias in the study, to appraise the applicability of the study findings and the validity of conclusions and recommendations. The list represents an update of the first version, which was published in 2003.

More information can be found on <http://www.equator-network.org/reporting-guidelines/stard>.

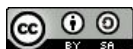

# BMJ Open

## Added value of electrical impedance spectroscopy in adjunction of colposcopy: a prospective cohort study

|                                 |                                                                                                                                                                                                                                                                                                                                                                                                                                                                                                                                                                                                                                                                                                                                                                                                                                                                                                                                                                                                                                                                                                                                                                                                                                                                                                                                                                                                                                                                                                                                                                |
|---------------------------------|----------------------------------------------------------------------------------------------------------------------------------------------------------------------------------------------------------------------------------------------------------------------------------------------------------------------------------------------------------------------------------------------------------------------------------------------------------------------------------------------------------------------------------------------------------------------------------------------------------------------------------------------------------------------------------------------------------------------------------------------------------------------------------------------------------------------------------------------------------------------------------------------------------------------------------------------------------------------------------------------------------------------------------------------------------------------------------------------------------------------------------------------------------------------------------------------------------------------------------------------------------------------------------------------------------------------------------------------------------------------------------------------------------------------------------------------------------------------------------------------------------------------------------------------------------------|
| Journal:                        | <i>BMJ Open</i>                                                                                                                                                                                                                                                                                                                                                                                                                                                                                                                                                                                                                                                                                                                                                                                                                                                                                                                                                                                                                                                                                                                                                                                                                                                                                                                                                                                                                                                                                                                                                |
| Manuscript ID                   | bmjopen-2023-074921.R1                                                                                                                                                                                                                                                                                                                                                                                                                                                                                                                                                                                                                                                                                                                                                                                                                                                                                                                                                                                                                                                                                                                                                                                                                                                                                                                                                                                                                                                                                                                                         |
| Article Type:                   | Original research                                                                                                                                                                                                                                                                                                                                                                                                                                                                                                                                                                                                                                                                                                                                                                                                                                                                                                                                                                                                                                                                                                                                                                                                                                                                                                                                                                                                                                                                                                                                              |
| Date Submitted by the Author:   | 17-Aug-2023                                                                                                                                                                                                                                                                                                                                                                                                                                                                                                                                                                                                                                                                                                                                                                                                                                                                                                                                                                                                                                                                                                                                                                                                                                                                                                                                                                                                                                                                                                                                                    |
| Complete List of Authors:       | Bergqvist, Laura; Helsinki University Central Hospital, Department of Obstetrics and Gynecology; University of Helsinki<br>Heinonen, Annu; Helsinki University Central Hospital, Department of Obstetrics and Gynecology; University of Helsinki<br>Carcopino, Xavier; IRD, Department of Obstetrics and Gynecology<br>Redman, Charles ; Royal Stoke University Hospital, Department of Obstetrics and Gynecology<br>Aro, Karoliina; Helsinki University Central Hospital, Department of Obstetrics and Gynecology; University of Helsinki<br>Kiviharju, Mari; Helsinki University Central Hospital, Department of Obstetrics and Gynecology; University of Helsinki<br>Virtanen, Seppo; Helsinki University Central Hospital, Department of Obstetrics and Gynecology; University of Helsinki<br>Omar, Pirjo-Liisa; Helsinki University Central Hospital, Department of Obstetrics and Gynecology; University of Helsinki<br>Kotaniemi-Talonen, Laura; Tampere University Hospital, Department of Obstetrics and Gynecology; Tampere University, Faculty of Medicine and Health Technology<br>Louvanto, Karolina; Tampere University, Department of Obstetrics and Gynecology; Tampere University Hospital, Department of Obstetrics and Gynecology<br>Nieminen, Pekka; University of Helsinki; Helsinki University Central Hospital, Department of Obstetrics and Gynecology<br>Kalliala, Ilkka ; Helsinki University Central Hospital Department of Obstetrics and Gynaecology; Imperial College London Department of Metabolism Digestion and Reproduction |
| <b>Primary Subject Heading</b>: | Obstetrics and gynaecology                                                                                                                                                                                                                                                                                                                                                                                                                                                                                                                                                                                                                                                                                                                                                                                                                                                                                                                                                                                                                                                                                                                                                                                                                                                                                                                                                                                                                                                                                                                                     |
| Secondary Subject Heading:      | Obstetrics and gynaecology, Oncology                                                                                                                                                                                                                                                                                                                                                                                                                                                                                                                                                                                                                                                                                                                                                                                                                                                                                                                                                                                                                                                                                                                                                                                                                                                                                                                                                                                                                                                                                                                           |
| Keywords:                       | Colposcopy < GYNAECOLOGY, Gynaecological oncology < GYNAECOLOGY, Community gynaecology < GYNAECOLOGY                                                                                                                                                                                                                                                                                                                                                                                                                                                                                                                                                                                                                                                                                                                                                                                                                                                                                                                                                                                                                                                                                                                                                                                                                                                                                                                                                                                                                                                           |
|                                 |                                                                                                                                                                                                                                                                                                                                                                                                                                                                                                                                                                                                                                                                                                                                                                                                                                                                                                                                                                                                                                                                                                                                                                                                                                                                                                                                                                                                                                                                                                                                                                |

1  
2  
3  
4  
5  
6  
7  
8  
9  
10  
11  
12  
13  
14  
15  
16  
17  
18  
19  
20  
21  
22  
23  
24  
25  
26  
27  
28  
29  
30  
31  
32  
33  
34  
35  
36  
37  
38  
39  
40  
41  
42  
43  
44  
45  
46  
47  
48  
49  
50  
51  
52  
53  
54  
55  
56  
57  
58  
59  
60

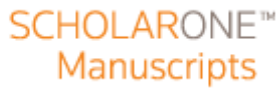

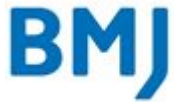

I, the Submitting Author has the right to grant and does grant on behalf of all authors of the Work (as defined in the below author licence), an exclusive licence and/or a non-exclusive licence for contributions from authors who are: i) UK Crown employees; ii) where BMJ has agreed a CC-BY licence shall apply, and/or iii) in accordance with the terms applicable for US Federal Government officers or employees acting as part of their official duties; on a worldwide, perpetual, irrevocable, royalty-free basis to BMJ Publishing Group Ltd ("BMJ") its licensees and where the relevant Journal is co-owned by BMJ to the co-owners of the Journal, to publish the Work in this journal and any other BMJ products and to exploit all rights, as set out in our [licence](#).

The Submitting Author accepts and understands that any supply made under these terms is made by BMJ to the Submitting Author unless you are acting as an employee on behalf of your employer or a postgraduate student of an affiliated institution which is paying any applicable article publishing charge ("APC") for Open Access articles. Where the Submitting Author wishes to make the Work available on an Open Access basis (and intends to pay the relevant APC), the terms of reuse of such Open Access shall be governed by a Creative Commons licence – details of these licences and which [Creative Commons](#) licence will apply to this Work are set out in our licence referred to above.

Other than as permitted in any relevant BMJ Author's Self Archiving Policies, I confirm this Work has not been accepted for publication elsewhere, is not being considered for publication elsewhere and does not duplicate material already published. I confirm all authors consent to publication of this Work and authorise the granting of this licence.



1  
2  
3 1 **Added value of electrical impedance spectroscopy in adjunction of colposcopy: a**  
4  
5 2 **prospective cohort study**  
6  
7  
8 3  
9

10 4 Laura Bergqvist,<sup>1</sup> Annu Heinonen,<sup>1</sup> Xavier Carcopino,<sup>2</sup> Charles Redman,<sup>3</sup> Karoliina Aro,<sup>1</sup> Mari Kiviharju,<sup>1</sup> Seppo  
11 5 Virtanen,<sup>1</sup> Pirjo-Liisa Omar,<sup>1</sup> Laura Kotaniemi-Talonen,<sup>4,5</sup> Karolina Louvanto,<sup>4,5</sup> Pekka Nieminen,<sup>\*1</sup> Ilkka  
12 6 Kalliala<sup>\*1,6</sup>  
13  
14  
15 7

16  
17 8 <sup>1</sup>Department of Obstetrics and Gynecology, University of Helsinki and Helsinki University Hospital, 00029  
18 9 Helsinki, Finland

19  
20 10 <sup>2</sup>Department of Obstetrics and Gynecology, Hôpital Nord, APHM, Aix-Marseille University (AMU), Univ  
21 11 Avignon, CNRS, IRD, IMBE UMR 7263, 13397, Marseille, France

22  
23 12 <sup>3</sup>Formerly Consultant Gynecological Oncologist, University Hospital of North Midlands, Stoke-on-Trent  
24

25  
26 13 <sup>4</sup>Department of Obstetrics and Gynecology, Faculty of Medicine and Health Technology, Tampere University,  
27 14 33100 Tampere, Finland

28  
29 15 <sup>5</sup>Department of Obstetrics and Gynecology, Tampere University Hospital, 33100 Tampere, Finland

30  
31 16 <sup>6</sup> Department of Metabolism, Digestion and Reproduction and Department of Surgery and Cancer, Faculty of  
32 17 Medicine, Imperial College London, London SW7 2AZ, UK

33  
34 18 \*Equal contribution  
35  
36  
37

38 20 Correspondence: Laura Bergqvist, MD; Department of Obstetrics and Gynecology, University of Helsinki and  
39 21 Helsinki University Hospital, Haartmaninkatu 2, 00290 Helsinki, Finland; fax +358947174801; e-mail  
40 22 [laura.bergqvist@hus.fi](mailto:laura.bergqvist@hus.fi)  
41  
42

43 23  
44  
45  
46 24  
47  
48 25  
49  
50 26  
51  
52 27  
53  
54  
55 28  
56  
57 29  
58  
59 30  
60

1  
2  
3 31 **Abstract**  
4  
5

6 32 **Objective:** To assess whether electrical impedance spectroscopy (EIS) as an adjunctive technology enhances  
7  
8 33 the performance of colposcopy.  
9

10 34 **Design:** Prospective cohort study.  
11

12 35 **Setting:** University Hospital colposcopy clinic.  
13  
14

15 36 **Participants:** Colposcopy with EIS for 647 women and conventional colposcopy for 962 women.  
16

17 37 **Interventions:** Comparison of the performance of colposcopy by referral cervical cytology in two cohorts,  
18  
19 38 with and without EIS as an adjunctive technology.  
20

21 39 **Outcome measures:** Prevalence of cervical intraepithelial neoplasia grade 2 or worse (CIN2+), diagnostic  
22  
23 40 testing accuracy to detect CIN2+ with and without EIS and their relative differences between cohorts.  
24  
25

26 41 **Results:** The prevalence of CIN2+ varied between the cohorts according to referral cytology: 17.0% after  
27  
28 42 abnormal squamous cells of unknown significance (ASC-US) referral cytology in EIS cohort and 9.1% in the  
29  
30 43 reference cohort, 16.5% and 18.9% after low-grade squamous intraepithelial lesion (LSIL), 44.3% and 58.2%  
31  
32 44 after atypical squamous cells, cannot exclude HSIL (ASC-H), and 81.9% and 77.0% after high-grade  
33  
34 45 squamous intraepithelial lesion (HSIL) cytology, respectively. Sensitivity to detect CIN2+ was higher in the  
35  
36 46 EIS cohort, varying from 1.79 (95% CI 1.30-2.45) after LSIL referral cytology to 1.16 (95% CI 1.09-1.23) after  
37  
38 47 HSIL referral cytology, with correspondingly lower specificity after any referral cytology.  
39  
40

41  
42 48 **Conclusions:** Colposcopy with EIS had overall higher sensitivity but lower specificity to detect CIN2+ than  
43  
44 49 conventional colposcopy. CIN2+ prevalence rates were, however, not consistently higher in the EIS cohort,  
45  
46 50 suggesting innate differences between the cohorts or truly lower detection rates of CIN2+ for EIS,  
47  
48 51 highlighting the need for randomized controlled trials on the effectiveness of EIS.  
49  
50

51  
52 52 **Keywords:** Electrical impedance spectroscopy (EIS), colposcopy, cervical intraepithelial neoplasia (CIN),  
53  
54 53 cervical cytology, sensitivity, specificity  
55  
56  
57

58 54  
59  
60

1  
2  
3  
4  
5  
6  
7  
8  
9  
10  
11  
12  
13  
14  
15  
16  
17  
18  
19  
20  
21  
22  
23  
24  
25  
26  
27  
28  
29  
30  
31  
32  
33  
34  
35  
36  
37  
38  
39  
40  
41  
42  
43  
44  
45  
46  
47  
48  
49  
50  
51  
52  
53  
54  
55  
56  
57  
58  
59  
60

### 55 **Strengths and limitations of this study**

- 56 1. The intervention and reference cohorts were both collected within the daily patient flow at the  
57 same colposcopy clinic.
- 58 2. The reference cohort was collected between 2013-2017 (n=962) and the EIS cohort between 2018-  
59 2021 (n=647).
- 60 3. The prevalence of CIN2+ in both cohorts was based on the histopathological data obtained at the  
61 first visit.
- 62 4. Diagnostic testing accuracy was calculated for the detection of CIN2+ in both cohorts.
- 63 5. We estimated the added value of electrical impedance spectroscopy compared to conventional  
64 colposcopy within and between cohorts stratified according to the referral cytology.

## 83 Introduction

84 During the next decades, the incidence and prevalence of high-grade cervical disease will decrease in the  
85 developed countries due to human papillomavirus (HPV) vaccination programs [1, 2] and transition to  
86 primary high-risk HPV (hrHPV)-DNA test -based screening.[3] Consequently, colposcopy will become more  
87 challenging due to resulting lower positive predictive value. Therefore, to detect those in need of  
88 treatment, it will be essential to correctly identify the high-grade lesions and take biopsies at  
89 representative locations. Also, reliable means to rule out high-grade lesions without excessive number of  
90 biopsies or frequently repeated tests or colposcopies are needed.

91 The sensitivity and specificity of colposcopy in identifying uterine cervical high-grade precancerous lesions  
92 have been previously reported to vary between 66% to 80% and 63% to 95%, respectively.[4-7]

93 Furthermore, the probability of detecting a high-grade disease at colposcopy is affected by the referral  
94 cytology, being higher after high-grade squamous intraepithelial lesion (HSIL) cytology than after atypical  
95 squamous cells of undetermined significance (ASC-US) or low-grade squamous intraepithelial lesion (LSIL)  
96 cytology results.[8]

97 ZedScan (Zillico Ltd.)[9] is a hand-held device using electrical impedance spectroscopy (EIS) in identifying  
98 cervical pathology.[10] It is designed to provide guidance to colposcopist in biopsy taking by indicating the  
99 most abnormal cervical tissue area.[10] ZedScan measures the electrical properties of the cervical  
100 epithelium to differentiate pre-cancerous and cancerous tissue from normal epithelium.[10-12] The area  
101 with the most abnormal impedance is reported visually, aiding the colposcopist in targeting biopsies.

102 The sensitivity of colposcopy has been suggested to increase with the use of EIS [10, 13-17] even in women  
103 with low probability of high-grade cervical disease and with minor colposcopic changes, as its use is  
104 independent of visual findings in colposcopy.[12, 18, 19] The developers of the technology have been  
105 involved in most of the published studies. In women with persistent hrHPV positivity without cervical  
106 cytological changes, EIS has detected additional cases of cervical intraepithelial neoplasia grade 2 or worse  
107 (CIN2+) compared to women without EIS examination.[18] The benefit of EIS seems to vary depending on

1  
2  
3 108 the referral cervical cytology, being most useful in terms of finding extra cases of CIN2+ in women with low-  
4  
5 109 grade referral cervical cytology.[13, 14, 16, 17] NICE guidelines recommend further research on EIS.[20]  
6  
7  
8 110 Our objective was to assess, stratified according to referral cytology, whether EIS combined with  
9  
10 111 colposcopy increases the diagnostic testing accuracy of CIN2+ compared to conventional colposcopy in  
11  
12 112 women referred to colposcopy for abnormal cervical cytology.  
13  
14

## 15 113 **Methods**

### 16 114 **Participants**

17  
18  
19 115 All women (n=1609) in this study were examined between 2013-21 at the outpatient colposcopy clinic of  
20  
21 116 Helsinki University Hospital for a new referral for abnormal cytology. We included women if their cervical  
22  
23 117 transformation zone (TZ) was type 1 or 2 (TZ1-2) and the information on both colposcopic impression and  
24  
25 118 histopathological results were available. Exclusion criteria were transformation zone type 3 (TZ3), previous  
26  
27 119 history of cervical cancer or large loop excision of the transformation zone (LLETZ) and pregnancy. Women  
28  
29 120 referred for persistent hrHPV positivity without cytological changes were excluded due to the lack of  
30  
31 121 sufficient control cohort as high-risk HPV testing as a part of primary screening was implemented in Helsinki  
32  
33 122 region only in 2019.  
34  
35  
36  
37  
38  
39

40 123 The EIS cohort consisted of 647 women with colposcopy and ZedScan examination successfully performed  
41  
42 124 between September 2018 and August 2021. The cohort was collected prospectively with non-consecutive  
43  
44 125 patient recruitment. Under the study period ZedScan equipment was available at the colposcopy and used  
45  
46 126 at the decision of the individual colposcopist. EIS examinations were done according to the manufacturer's  
47  
48 127 protocol and all colposcopists had an adequate training prior using the device. If active bleeding during  
49  
50 128 colposcopy occurred, the EIS procedure was omitted.  
51  
52  
53

54 129 We could not directly compare the performance of colposcopy alone against colposcopy with ZedScan as  
55  
56 130 an adjunctive tool using only the EIS cohort, as these two events were not truly independent of each other  
57  
58 131 in the routine clinical setting applied here. Therefore, we used a previously collected prospective cohort of  
59  
60

1  
2  
3 132 962 patients examined with conventional colposcopy in the colposcopy clinic of Helsinki University  
4  
5 133 Hospital, Finland, between 2013 and July 2017 as the reference cohort (ISRCTN10933736),[21] with all  
6  
7 134 women fulfilling the inclusion criteria included. Only the primary colposcopy after referral and its  
8  
9  
10 135 histological results were included in both cohorts.

11  
12  
13 136 Abnormal cervical cytology results were categorized according to the Bethesda system as ASC-US or worse.  
14  
15 137 Histological results were reported according to WHO 2003, 2013 and 2020 classification. The evaluation of  
16  
17 138 histopathological specimens, biopsies, and LLETZ cones, was done by the gynaecological histopathologists  
18  
19 139 of Helsinki University Hospital. The most severe histological diagnosis of all biopsies or LLETZ was recorded.

## 22 140 **Clinical procedures**

23  
24  
25 141 All participants had a colposcopic examination with the application of acetic acid to the cervix.

26  
27 142 Subsequently, participants in the EIS cohort underwent a ZedScan examination. ZedScan readings were  
28  
29 143 made from 10 to 12 points clockwise around the cervix. On the Zedscan reading, red colour points out the  
30  
31 144 area with the highest probability of high-grade disease, amber colour indicates possible high-grade areas  
32  
33 145 and the absence of high-grade disease is indicated with green colour. In most women, 12 measurements  
34  
35 146 cover well the junction area of the cervix. However, it might be possible that minor areas are omitted in  
36  
37 147 case of very large cervix. After routine measurements (10-12 around the cervix) in case of suspected  
38  
39 148 presence of CIN2+ by ZedScan, a particular single point mode can be used to localise more carefully the  
40  
41 149 most abnormal area to be biopsied. In the EIS cohort, cervical biopsy sites were determined by the  
42  
43 150 colposcopist based on both ZedScan results and colposcopic impression. The most severe histological  
44  
45 151 diagnosis of all biopsies was recorded.

46  
47  
48  
49  
50 152 Random biopsies were not routinely taken in either of the cohorts. Colposcopy examination in both cohorts  
51  
52 153 was based on Finnish Current Care Guidelines.[22] Five percent acetic acid and Lugol's iodine were  
53  
54 154 available at the discretion of individual colposcopist to assess the abnormal cervical areas for biopsy. The  
55  
56 155 colposcopic impression was recorded as high-grade, low-grade, or normal. Immediate LLETZ at initial visit  
57  
58 156 ('select and treat'-approach) was performed when evaluated necessary according to Finnish Current Care  
59  
60

1  
2  
3  
4  
5  
6  
7  
8  
9  
10  
11  
12  
13  
14  
15  
16  
17  
18  
19  
20  
21  
22  
23  
24  
25  
26  
27  
28  
29  
30  
31  
32  
33  
34  
35  
36  
37  
38  
39  
40  
41  
42  
43  
44  
45  
46  
47  
48  
49  
50  
51  
52  
53  
54  
55  
56  
57  
58  
59  
60

157 Guidelines: HSIL referral cytology with a colposcopic impression of CIN2+ entitled to perform LLETZ at the  
158 initial colposcopy with consent from the patient.[22] After cervical cytology with glandular atypia favouring  
159 neoplasia (AGC-FN) the Finnish Current Care Guidelines recommends immediate LLETZ irrespective of the  
160 age of the referred woman.[22]

### 161 **Data analysis**

162 We compared the prevalence of histologically confirmed CIN2+ lesions between the EIS and reference  
163 cohorts and calculated the sensitivity, specificity, positive and negative predictive values for colposcopy in  
164 both cohorts for the detection of CIN2+ lesions, both overall and stratified according to the referral cervical  
165 cytology. The positive test result for EIS cohort was defined as suspected presence of CIN2+ either by  
166 ZedScan and/or via colposcopic inspection. The test result was negative if both the colposcopic impression  
167 and ZedScan agreed on low-grade lesion or normal cervical finding, i.e. absence of CIN2+ lesion. In the  
168 reference cohort, positive test result was defined as a colposcopic impression of CIN2+ while negative test  
169 result was defined as the absence of changes suggesting CIN2+ lesions. The most advanced  
170 histopathological result of the biopsies or LLETZ specimen taken at the initial visit were used as a reference  
171 standard in both cohorts. Women without biopsies and with negative ZedScan result and normal  
172 colposcopic impression as well as low-grade referral were considered true negatives. Even though  
173 colposcopy and EIS examination were not truly independent tests in the setting used, we still performed a  
174 sensitivity analysis within the EIS cohort and assessed separately diagnostic testing accuracy of colposcopy  
175 and EIS in that cohort alone as well.

176 Risk ratio and risk difference were used to compare the sensitivity and specificity between the EIS and  
177 reference cohorts. The  $p$ -values  $<0.05$  were considered statistically significant. All statistical analyses were  
178 performed using STATA/SE 15 (StataCorp, College Station TX, USA) and all statistical tests used were two-  
179 sided.

### 180 **Patient and public involvement**

1  
2  
3 181 Patients and/or the public were not involved in the design, conduct, reporting, or dissemination of this  
4  
5 182 research.

## 8 183 **Results**

11 184 There were 1027 eligible women with adequate colposcopy and Zedscan examination performed in the EIS  
12  
13 185 cohort. Altogether 68 women with other referral reasons than abnormal cervical cytology, 215 women with  
14  
15 186 follow-up colposcopy visits and 97 women with missing data were excluded. In total, 647 women with new  
16  
17  
18 187 colposcopy referrals of abnormal cytology were included in the analysis (Figure S1, Table 1). Of all ZedScan  
19  
20 188 procedures 75% were conducted by three individual colposcopists. The reference cohort included 1383  
21  
22 189 eligible women. Of these, 86 women were excluded due to other referral reasons than abnormal cervical  
23  
24 190 cytology, 174 for having TZ3, 143 for missing relevant clinical data and 18 for pregnancy. As a result, a total  
25  
26  
27 191 of 962 women fulfilled the inclusion criteria (Figure S1, Table 1).

30 192 At least one biopsy was taken or imminent LLETZ made in 625 (96.6%) women in the EIS cohort and 952  
31  
32 193 (99.0%) in the reference cohort. Only one biopsy was taken from one quarter of women 165 (25.5%) in the  
33  
34 194 EIS cohort and among 109 (11.3%) in the reference cohort, whereas twenty-two (3.4%) women in the EIS  
35  
36 195 cohort and 10 (1.0%) in the reference cohort had no biopsy. The average number of biopsies was 1.8 if at  
37  
38  
39 196 least one biopsy was taken in the EIS cohort and 2.3 in the reference cohort (Table 1).

42 197 Altogether 222 (34.3%) women in the EIS cohort had CIN2+, including 5 (0.8%) cervical carcinomas and 14  
43  
44 198 (2.2%) adenocarcinoma in situ cases. In the reference cohort 391 (40.6%) women had CIN2+, including 7  
45  
46 199 (0.7%) cervical carcinomas and 15 (1.6%) adenocarcinoma in situ cases. (Table 1). The prevalence of CIN2+  
47  
48 200 was higher in the reference cohort among those referred for LSIL or ASC-H cytology, whereas the  
49  
50 201 prevalence of CIN2+ was higher in the EIS cohort after ASC-US and HSIL referral cytology (Table 2, Table S1).

53 202 In the EIS cohort the overall sensitivity to detect CIN2+ was 94% (95% CI 90-97%) with corresponding  
54  
55 203 specificity of 34% (95% CI 29-39%) (Table 2, Table S1). The sensitivity varied according to referral cytology,  
56  
57  
58 204 being the lowest, 77%, for LSIL cytology (95% CI 61-89%) and the highest for HSIL cytology with 100%  
59  
60 205 sensitivity (95% CI 95-100%) (Table 2, Table S1). The specificity was lowest for HSIL cytology, 6% (95% CI 0-



1  
2  
3  
4  
5  
6  
7  
8  
9  
10  
11  
12  
13  
14  
15  
16  
17  
18  
19  
20  
21  
22  
23  
24  
25  
26  
27  
28  
29  
30  
31  
32  
33  
34  
35  
36  
37  
38  
39  
40  
41  
42  
43  
44  
45  
46  
47  
48  
49  
50  
51  
52  
53  
54  
55  
56  
57  
58  
59  
60**Table 1.** Characteristics of the electrical impedance spectroscopy (EIS) cohort and the reference cohort.

|                                                     | EIS cohort      |       | Reference cohort |       |
|-----------------------------------------------------|-----------------|-------|------------------|-------|
|                                                     | n=647           | %     | n=962            | %     |
| Mean age                                            | 35.7            |       | 35.4             |       |
| Std.dev., Range                                     | 9.3 (20.3-76.4) |       | 9.6 (19.2-67.8)  |       |
| <b>Age</b>                                          |                 |       |                  |       |
| <30 y                                               | 175             | 27.1  | 295              | 30.7  |
| 30-44 y                                             | 366             | 56.6  | 495              | 51.5  |
| ≥45 y                                               | 106             | 16.4  | 172              | 17.9  |
|                                                     | 647             | 100.0 | 962              | 100.0 |
| <b>Referral cervical cytology stratified by age</b> |                 |       |                  |       |
| ASC-US                                              |                 |       |                  |       |
| <30 y                                               | 28              | 4.3   | 43               | 4.5   |
| 30-44 y                                             | 52              | 8.0   | 28               | 2.9   |
| ≥45 y                                               | 14              | 2.2   | 28               | 2.9   |
| LSIL                                                |                 |       |                  |       |
| <30 y                                               | 39              | 6.0   | 79               | 8.2   |
| 30-44 y                                             | 153             | 23.6  | 224              | 23.3  |
| ≥45 y                                               | 44              | 6.8   | 78               | 8.1   |
| ASC-H                                               |                 |       |                  |       |
| <30 y                                               | 72              | 11.1  | 90               | 9.4   |
| 30-44 y                                             | 90              | 13.9  | 120              | 12.5  |
| ≥45 y                                               | 30              | 4.6   | 27               | 2.8   |
| HSIL                                                |                 |       |                  |       |
| <30 y                                               | 31              | 4.8   | 75               | 7.8   |
| 30-44 y                                             | 54              | 8.3   | 102              | 10.6  |
| ≥45 y                                               | 9               | 1.4   | 23               | 2.4   |
| AGC-NOS                                             |                 |       |                  |       |
| <30 y                                               | 5               | 0.8   | 5                | 0.5   |
| 30-44 y                                             | 15              | 2.3   | 12               | 1.2   |
| ≥45 y                                               | 8               | 1.2   | 11               | 1.1   |
| AGC-FN                                              |                 |       |                  |       |
| <30 y                                               | 0               | 0.0   | 3                | 0.3   |
| 30-44 y                                             | 2               | 0.3   | 9                | 0.9   |
| ≥45 y                                               | 1               | 0.2   | 5                | 0.5   |
|                                                     | 647             | 100.0 | 962              | 100.0 |
| <b>TZ type</b>                                      |                 |       |                  |       |
| TZ type 1                                           | 446             | 68.9  | 620              | 64.4  |
| TZ type 2                                           | 201             | 31.1  | 342              | 35.6  |
|                                                     | 647             | 100.0 | 962              | 100.0 |
| <b>Biopsies and LLETZ</b>                           |                 |       |                  |       |
| No biopsy                                           | 22              | 3.4   | 10               | 1.0   |
| 1 biopsy                                            | 165             | 25.5  | 109              | 11.3  |
| 2 biopsies                                          | 263             | 40.6  | 420              | 43.7  |
| 3 biopsies                                          | 83              | 12.8  | 257              | 26.7  |
| 4 biopsies                                          | 1               | 0.2   | 43               | 4.5   |
| 5 biopsies                                          | 0               | 0.0   | 5                | 0.5   |
| LLETZ                                               | 113             | 17.5  | 118              | 12.3  |
|                                                     | 647             | 100.0 | 962              | 100.0 |
| <b>Histology</b>                                    |                 |       |                  |       |
| No biopsy                                           | 22              | 3.4   | 10               | 1.0   |
| Normal histology                                    | 222             | 34.3  | 247              | 25.7  |
| CIN1 (LSIL)                                         | 181             | 28.0  | 312              | 32.4  |
| CIN2 (HSIL)                                         | 95              | 14.7  | 210              | 21.8  |
| CIN3 (HSIL)                                         | 107             | 16.5  | 154              | 16.0  |
| Glandular atypia                                    | 1               | 0.2   | 7                | 0.7   |
| AIS                                                 | 14              | 2.2   | 15               | 1.6   |
| Adenocarcinoma                                      | 3               | 0.5   | 3                | 0.3   |
| Sq. cell carcinoma                                  | 2               | 0.3   | 4                | 0.4   |
|                                                     | 647             | 100.0 | 962              | 100.0 |

Std. dev.: standard deviation; EIS: electrical impedance spectroscopy; CIN: cervical intraepithelial neoplasia; TZ: transformation zone; ASC-US: atypical squamous cells of undetermined significance; LSIL: low-grade squamous intraepithelial lesion; HSIL: high-grade squamous intraepithelial lesion; ASC-H: atypical squamous cells that cannot exclude HSIL; AGC-NOS: atypical glandular cells not otherwise specified; AGC-FN: atypical glandular cells that favor neoplasia; AIS: adenocarcinoma in situ; sq. cell carcinoma: squamous cell carcinoma; LLETZ: large loop excision of the transformation zone

**Table 2.** Sensitivity, specificity of the electrical impedance spectroscopy (EIS) cohort and the reference cohort for the detection of CIN2+ lesions by cervical cytology, TZ type and age group.

|              | EIS cohort (n=647) |                    |             |             | Reference cohort (n=962) |                    |             |             |
|--------------|--------------------|--------------------|-------------|-------------|--------------------------|--------------------|-------------|-------------|
|              | CIN2+/n            | CIN2+ <sup>1</sup> | Sensitivity | Specificity | CIN2+/n                  | CIN2+ <sup>2</sup> | Sensitivity | Specificity |
| ASC-US       | 16/94              | 15                 | 94(70-100)  | 47(36-59)   | 9/99                     | 5                  | 56(21-86)   | 97(91-99)   |
| LSIL         | 39/236             | 30                 | 77(61-89)   | 42(35-49)   | 72/381                   | 31                 | 43(31-55)   | 92(89-95)   |
| ASC-H        | 85/192             | 84                 | 99(94-100)  | 11(6-19)    | 138/237                  | 87                 | 63(54-71)   | 65(54-74)   |
| HSIL         | 77/94              | 77                 | 100(95-100) | 6(0-29)     | 154/200                  | 133                | 86(80-91)   | 46(31-61)   |
| AGC-NOS      | 3/28               | 2                  | 67(9-99)    | 44(24-65)   | 5/28                     | 3                  | 60(15-95)   | 96(78-100)  |
| AGC-FN       | 2/3                | 1                  | 50(1-99)    | 100(3-100)  | 13/17                    | 8                  | 62(32-86)   | 25(1-81)    |
| ALL          | 222/647            | 209                | 94(90-97)   | 34(29-39)   | 391/962                  | 267                | 68(63-73)   | 84(81-87)   |
| TZ1          | 156/446            | 146                | 94(89-97)   | 31(26-37)   | 279/620                  | 187                | 67(61-73)   | 84(80-88)   |
| TZ2          | 66/201             | 63                 | 96(87-99)   | 40(32-49)   | 112/342                  | 80                 | 71(62-80)   | 84(79-88)   |
| <30 y        | 60/175             | 56                 | 93(84-98)   | 35(26-44)   | 134/295                  | 96                 | 72(63-79)   | 77(70-83)   |
| 30-44 y      | 131/366            | 124                | 95(89-98)   | 33(27-40)   | 211/495                  | 144                | 68(62-75)   | 86(81-90)   |
| >45 y        | 31/106             | 29                 | 94(79-99)   | 35(24-47)   | 46/172                   | 27                 | 59(43-73)   | 89(82-94)   |
| HG cytology  | 164/289            | 162                | 99(96-100)  | 11(6-18)    | 305/454                  | 228                | 75(70-80)   | 58(49-66)   |
| LG cytology  | 58/358             | 47                 | 81(69-90)   | 43(38-49)   | 86/508                   | 39                 | 45(35-57)   | 93(91-96)   |
| ASC-H, HSIL  | 162/286            | 161                | 99(97-100)  | 11(6-17)    | 292/437                  | 220                | 75(70-80)   | 59(50-67)   |
| ASC-US, LSIL | 55/330             | 45                 | 82(69-91)   | 43(37-49)   | 81/480                   | 36                 | 44(33-56)   | 93(90-96)   |
| Glandular    | 5/31               | 3                  | 60(15-95)   | 46(27-67)   | 18/45                    | 11                 | 61(36-83)   | 85(66-96)   |
| 1 biopsy     | 11/165             | 7                  | 64(31-89)   | 51(43-59)   | 14/109                   | 5                  | 36(13-65)   | 99(94-100)  |
| 2 biopsies   | 78/263             | 70                 | 90(81-96)   | 23(17-30)   | 112/420                  | 66                 | 59(49-68)   | 90(86-93)   |
| ≥3 biopsies  | 43/84              | 43                 | 100         | 0           | 168/305                  | 113                | 67(60-74)   | 67(59-75)   |
| LLETZ        | 90/113             | 89                 | 99(94-100)  | 4(0-22)     | 97/118                   | 83                 | 86(77-92)   | 38(18-62)   |

EIS: electrical impedance spectroscopy; CIN: cervical intraepithelial neoplasia; TZ: transformation zone; ASC-US: atypical squamous cells of undetermined significance; LSIL: low-grade squamous intraepithelial lesion; HSIL: high-grade squamous intraepithelial lesion; ASC-H: atypical squamous cells that cannot exclude HSIL; AGC-NOS: atypical glandular cells not otherwise specified; AGC-FN: atypical glandular cells that favor neoplasia; LLETZ: large loop excision of the transformation zone; HG high grade; LG: low grade

<sup>1</sup>Colposcopic impression and/or ZedScan result of CIN2+ of histologically confirmed CIN2+ cases.

<sup>2</sup>Colposcopic impression of CIN2+ of histologically confirmed CIN2+ cases.

29%), and highest for ASC-US, 47% (95% CI 36-59%). EIS missed 3 low-grade referral cases of CIN2+ identified by the colposcopist (two cases if CIN2 and one CIN3). Colposcopic impression was less than CIN2 in 43 CIN2+ cases that were detected by ZedScan. A total of 13 cases (5.9%) of CIN2+ were missed by both ZedScan and the colposcopist (biopsies were still taken due to suspicion of low-grade lesion), including two adenocarcinoma in situ cases and eleven high-grade lesions (nine CIN2 and two CIN3 cases). In the reference cohort, the overall sensitivity to detect CIN2+ was 68% (95% CI 63-73%) with corresponding specificity of 84% (95% CI 81-87%) (Table 2, Table S1). The sensitivity to detect CIN2+ by colposcopic impression of CIN2+ was the lowest after LSIL cytology, 43%, and the highest after HSIL cytology, 86% (Figure 1, Table 2, Table S1). Overall, the colposcopic impression was less than CIN2+ in 31.7% (124/391) of CIN2+ cases and biopsies were taken due to suspicion of a low-grade lesion. Results

1  
2  
3 230 stratified according to TZ type, age, and referral cytology are presented in Table S2. There was no obvious  
4  
5 231 impact of age on specificity or sensitivity within different cytologies (Table S2).  
6  
7  
8 232 Compared to the referral cohort, the sensitivity to detect CIN2+ was higher in the EIS cohort overall, with  
9  
10 233 risk ratio (RR) of 1.38 (95% CI 1.28-1.49), and after LSIL, ASC-H and HSIL referral cervical cytologies (Table 3,  
11  
12 234 Table S3). TZ 1 and taking two or more biopsies were associated with higher observed sensitivity (Table 3,  
13  
14  
15 235 Table S3). Specificity was correspondingly lower in the EIS cohort overall as well as when stratified  
16  
17 236 according to referral cytology (Table 3, Table S3).  
18  
19

20 237 **Table 3.** Sensitivity and specificity of the electrical impedance spectroscopy cohort (EIS) and the reference cohort by cytology, TZ type and age  
21 238 group in identifying CIN2+, with corresponding risk ratios (RR) of sensitivity and specificity.

|             | Sensitivity |           |                       |         | Specificity |            |                       |         |
|-------------|-------------|-----------|-----------------------|---------|-------------|------------|-----------------------|---------|
|             | EIS         | Reference | RR (95%) <sup>1</sup> | p.      | EIS         | Reference  | RR (95%) <sup>1</sup> | p.      |
| ASC-US      | 94(70-100)  | 56(21-86) | 1.69(0.93-3.07)       | 0.0219  | 47(36-59)   | 97(91-99)  | 0.49(0.39-0.62)       | <0.0001 |
| LSIL        | 77(61-89)   | 43(31-55) | 1.79(1.30-2.45)       | 0.0006  | 42(35-49)   | 92(89-95)  | 0.45(0.38-0.53)       | <0.0001 |
| ASC-H       | 99(94-100)  | 63(54-71) | 1.57(1.38-1.78)       | <0.0001 | 11(6-19)    | 65(54-74)  | 0.17(0.10-0.30)       | <0.0001 |
| HSIL        | 100(95-100) | 86(80-91) | 1.16(1.09-1.23)       | 0.0007  | 6(0-29)     | 46(31-61)  | 0.13(0.02-0.89)       | 0.0033  |
| AGC-NOS     | 67(9-99)    | 60(15-95) | 1.11(0.38-3.25)       | 0.8504  | 44(24-65)   | 96(78-100) | 0.46(0.29-0.72)       | 0.0001  |
| AGC-FN      | 50(1-99)    | 62(32-86) | 0.81(0.19-3.47)       | 0.7565  | 100(3-100)  | 25(1-81)   | 4.0(0.73-21.84)       | 0.1709  |
| ALL         | 94(90-97)   | 68(63-73) | 1.38(1.28-1.49)       | <0.0001 | 34(29-39)   | 84(81-87)  | 0.40(0.35-0.46)       | <0.0001 |
| TZ1         | 94(89-97)   | 67(61-73) | 1.40(1.27-1.53)       | <0.0001 | 31(26-37)   | 84(80-88)  | 0.37(0.31-0.44)       | <0.0001 |
| TZ2         | 96(87-99)   | 71(62-80) | 1.34(1.18-1.57)       | 0.0001  | 40(32-49)   | 84(79-88)  | 0.48(0.38-0.59)       | <0.0001 |
| <30 y       | 93(84-98)   | 72(63-79) | 1.30(1.15-1.48)       | 0.0007  | 35(26-44)   | 77(70-83)  | 0.45(0.35-0.59)       | <0.0001 |
| 30-44 y     | 95(89-98)   | 68(62-75) | 1.39(1.25-1.53)       | <0.0001 | 33(27-40)   | 86(81-90)  | 0.39(0.32-0.47)       | <0.0001 |
| ≥45 y       | 94(79-99)   | 59(43-73) | 1.59(1.23-2.07)       | 0.0008  | 35(24-47)   | 89(82-94)  | 0.39(0.28-0.54)       | <0.0001 |
| HG cytology | 99(96-100)  | 75(70-80) | 1.32(1.24-1.41)       | <0.0001 | 11(6-18)    | 58(49-66)  | 0.19(0.12-0.32)       | <0.0001 |
| LG cytology | 81(69-90)   | 45(35-57) | 1.79(1.37-2.33)       | <0.0001 | 43(38-49)   | 93(91-96)  | 0.46(0.41-0.53)       | <0.0001 |
| 1 biopsy    | 64(31-89)   | 36(13-65) | 1.78(0.77-4.10)       | 0.1654  | 51(43-59)   | 99(94-100) | 0.51(0.44-0.60)       | <0.0001 |
| 2 biopsies  | 90(81-96)   | 59(49-68) | 1.52(1.28-1.81)       | <0.0001 | 23(17-30)   | 90(86-93)  | 0.26(0.20-0.34)       | <0.0001 |
| ≥3 biopsies | 100         | 67(60-74) | 1.49(1.34-1.65)       | <0.0001 | 0           | 67(59-75)  | 0                     | <0.0001 |

239 EIS: electrical impedance spectroscopy; CIN: cervical intraepithelial neoplasia; TZ: transformation zone; ASC-US: atypical squamous cells of  
240 undetermined significance; LSIL: low-grade squamous intraepithelial lesion; HSIL: high-grade squamous intraepithelial lesion; ASC-H: atypical  
241 squamous cells that cannot exclude HSIL; AGC-NOS: atypical glandular cells not otherwise specified; AGC-FN: atypical glandular cells that favor  
242 neoplasia; HG: high grade; LG: low grade

243 <sup>1</sup>The values of risk ratio >1 imply better/improved effect with ZedScan

55  
56  
57  
58  
59  
60

1  
2  
3  
4  
5  
6  
7  
8  
9  
10  
11  
12  
13  
14  
15  
16  
17  
18  
19  
20  
21  
22  
23  
24  
25  
26  
27  
28  
29  
30  
31  
32  
33  
34  
35  
36  
37  
38  
39  
40  
41  
42  
43  
44  
45  
46  
47  
48  
49  
50  
51  
52  
53  
54  
55  
56  
57  
58  
59  
60

244 In the EIS cohort, colposcopic impression of high-grade disease (CIN2+) was present with EIS indicating the  
245 presence of CIN2+ in 73.4% of all histologically confirmed CIN2+ cases. In the sensitivity analysis within the  
246 EIS cohort, colposcopy alone was indicative for the presence of CIN2+ in 166 of 222 CIN2+ cases (74.8%)  
247 and ZedScan in 206 of 222 (92.8%) of CIN2+ cases, suggesting an additional 40 cases (24.1%) detected by  
248 ZedScan only. The additional cases increased the detection of CIN2+ from 30 to 44 in women with low-  
249 grade cytology and from 136 to 162 in women with high-grade cytology (Figure 1). The sensitivity to detect  
250 CIN2+ by colposcopy alone according to referral cytology was otherwise similar between the cohorts,  
251 except for women with ASC-H cervical cytology the colposcopy alone in the EIS cohort seemed to detect  
252 more CIN2+ cases ( $p=0.02$ ) (Figure 1). Among colposcopists who performed colposcopies in both cohorts,  
253 the average number of biopsies by cytology were higher in all cytology groups in the reference cohort  
254 compared to the EIS cohort. The average number of biopsies varied between 1.7-2.3 in the EIS cohort and  
255 between 2.2-2.8 in the reference cohort (Table S4).

## 256 Discussion

257 We compared the performance of colposcopy in detecting CIN2+ according to referral cervical cytology  
258 with and without EIS as an adjunctive technology. Colposcopy combined with EIS seemed to have a higher  
259 sensitivity, but a lower specificity compared to conventional colposcopy, regardless of the referral cervical  
260 cytology. The prevalence of CIN2+ lesions was higher in the EIS cohort after ASC-US and HSIL referral, but  
261 lower after LSIL and ASC-H cervical cytology. The average number of biopsies was lower in the EIS cohort.

262  
263 Overall, EIS performed well with a high sensitivity (94%) but had a low specificity (34%) consistent with the  
264 previous studies.[13, 14, 16] Here, the sensitivity might have been overestimated in both cohorts as the  
265 true positive result was based on histology data at first visit only and lesions missed at first visit and  
266 detected during the follow-up were not included in either cohort. Still, this would not affect the estimates  
267 of relative performance. The sensitivity (68%) and specificity (84%) of colposcopy in the reference cohort  
268 was as well in line with existing data.[5, 7, 23]

1  
2  
3 269 The increased detection of CIN2+ cases by EIS has been reported as most pronounced in women with low-  
4  
5 270 grade cytology [13, 14, 16, 17] or with high-risk HPV positivity without cytological changes.[16, 18] In our  
6  
7  
8 271 study, additional cases of CIN2+ detected by EIS were also most frequent among low-grade referrals.  
9  
10 272 Furthermore, the sensitivity to detect CIN2+ with EIS was higher in most cervical cytology groups (ASC-US,  
11  
12 273 LSIL, ASC-H, HSIL) compared to colposcopy alone. Only within HSIL cytology EIS combined with colposcopy  
13  
14 274 detected all CIN2+ cases. In women with other referral cytology (ASC-US, LSIL, ASC-H) there were cases of  
15  
16 275 CIN2+ that EIS did not detect, but where biopsy of CIN2+ was warranted based on colposcopic diagnosis.  
17  
18  
19 276 Nevertheless, missed cases of CIN2+ were even more frequent in the reference cohort, where more CIN2+  
20  
21 277 lesions were detected in biopsies with colposcopic impression of CIN1 or lower. Contrary to expectations,  
22  
23 278 the prevalence of CIN2+ was higher in the EIS cohort only after ASC-US and HSIL referral cytology. One  
24  
25 279 explanation for lower prevalence of CIN2+ lesions in the EIS cohort after LSIL and ASC-H cytology could be  
26  
27  
28 280 that routine practice in Finland is to take biopsies also from low-grade lesions, rather than to abstain from  
29  
30 281 taking biopsies when CIN2+ lesions are not colposcopically suspected. Biopsies even from mild acetowhite  
31  
32 282 lesions are important in excluding a high-grade disease as the sensitivity of colposcopy to detect CIN2+ is  
33  
34 283 far from 100%. Such biopsies could well have been more frequent without than with EIS as an additional  
35  
36  
37 284 confirmation on suspected absence of CIN2+. This is supported by the observation that two or more  
38  
39 285 biopsies were taken from 54% of women in the EIS cohort, whereas up to 75% of women in the reference  
40  
41 286 cohort had at least two biopsies. In addition, the average number of biopsies by cytology among  
42  
43 287 colposcopists who performed colposcopies in both cohorts were constantly higher in the reference cohort  
44  
45  
46 288 compared to the EIS cohort reflecting a change in manner/threshold to take biopsies when ZedScan was  
47  
48 289 used as an adjunct technology. Multiple biopsies are known to increase the sensitivity of colposcopy as at  
49  
50 290 least small lesions can easily be missed.[24, 25] In women with low-grade referral cervical cytology, a single  
51  
52 291 biopsy has shown to be insufficient to rule out a high-grade disease.[26] A British survey has also reported  
53  
54 292 experienced colposcopists to take mostly two biopsies in diagnosing high-grade disease.[27] A Danish study  
55  
56  
57 293 found taking four biopsies to increase the detection rate of cervical dysplasia to 95.2%.[28] The average  
58  
59  
60

1  
2  
3  
4  
5  
6  
7  
8  
9  
10  
11  
12  
13  
14  
15  
16  
17  
18  
19  
20  
21  
22  
23  
24  
25  
26  
27  
28  
29  
30  
31  
32  
33  
34  
35  
36  
37  
38  
39  
40  
41  
42  
43  
44  
45  
46  
47  
48  
49  
50  
51  
52  
53  
54  
55  
56  
57  
58  
59  
60

294 number of biopsies in the EIS cohort was higher (1.84) compared to previous reports (1.07 and 1.51),[13,  
14] but still lower than in the reference cohort (2.3).

296 Our observation of overall fewer biopsies along with fewer CIN2+ lesions detected in the EIS cohort can  
297 either indicate a true difference in CIN2+ prevalence between the cohorts, selection bias towards using EIS  
298 preferably on patients in whom CIN2+ lesion is not clearly present, or that CIN2+ lesions could have been  
299 missed in the EIS cohort, especially after LSIL and ASC-H referral cytology. If lesions were missed, it could  
300 possibly be due to a higher biopsy threshold in the EIS cohort, as indicated by lower number of biopsies.  
301 Without longitudinal data we still cannot be certain whether prevalent CIN2+ cases were indeed more  
302 frequently missed at the first visit in the EIS cohort. The prevalence of CIN2+ in EIS cohort in women with  
303 high-grade cytology (ASC-H and HSIL) is below previous observations (56.7% vs. 79.1-84.0%).[13, 16]  
304 However, when restricted to only women with HSIL referral cervical cytology or low-grade (ASC-US and  
305 LSIL) cytology, the prevalence for CIN2+ here did not differ from previous reports.[13, 16] Cytological  
306 diagnoses may well vary between cytopathologists as well as between countries and this possible  
307 difference in classification might also explain the observed difference in CIN2+ prevalence, especially after  
308 ASC-H cytology.[29] The longitudinal data on EIS results are scarce. In women referred with low-grade  
309 cytology, the future risk of CIN2+ was increased in up to 36 months follow-up if both colposcopic  
310 impression and EIS results were indicative for CIN2+ compared with women with other combinations of  
311 these two parameters, suggesting that EIS might provide new information on the future risk of high-grade  
312 disease.[30]

### 313 **Strengths and limitations**

314 Most previous studies have compared the performance of EIS as an adjunctive technology for colposcopy  
315 against conventional colposcopy within the cohort where EIS was used, even though in clinical setting EIS is  
316 not a truly independent measurement from colposcopy. To our knowledge this is the first report on the  
317 performance of EIS as an adjunctive technology for colposcopy stratified according to referral cytology and  
318 compared to an external reference cohort. Even though our cohorts were collected at different time

1  
2  
3 319 periods, they both represent women in the same catchment area referred to colposcopy due to abnormal  
4  
5 320 cervical cytology. All colposcopies were performed in the same clinic by experienced colposcopists.  
6  
7  
8 321 Furthermore, none of the authors of this work have financial conflicts of interest with the technology  
9  
10 322 studied. Our study also has some limitations. It is not possible to rule out that there would not have been  
11  
12 323 any variation in sensitivity or specificity between the cohorts in different time periods. EIS device is not  
13  
14 324 truly independent of colposcopic skills and the colposcopic performance can vary depending on the  
15  
16 325 colposcopist. Also, the referral cytology and the colposcopic impression are incorporated in the EIS analysis  
17  
18  
19 326 by ZedScan. In order to take into account the variation of colposcopic performance and reliance on EIS  
20  
21 327 device we collected a large cohort representing routine work. Including colposcopic examinations by  
22  
23 328 several different colposcopists represents a real-life situation which could be considered as a strength  
24  
25 329 compared to studies where all colposcopies have been performed by a single colposcopist.  
26  
27  
28 330 When the cervical transformation zone is not fully visible, TZ type 3, ZedScan technology cannot be reliably  
29  
30 331 applied and the results are not applicable to this population. CIN2+ lesions could well have been missed in  
31  
32 332 both cohorts since the results are based on data collected on the initial visit. EIS might miss some lesions  
33  
34 333 that either could have been detected with lower biopsy threshold or where biopsy would not have been  
35  
36 334 indicated even in conventional colposcopy. However, complete certainty of the histology would have  
37  
38 335 required LLETZ for all participants which would not have been ethically just.  
39  
40  
41

## 42 336 **Conclusions**

43  
44  
45 337 Colposcopy with EIS has a higher sensitivity and a lower specificity in identifying CIN2+ compared to  
46  
47 338 conventional colposcopy, irrespective of cervical cytology. EIS can, therefore, be assumed to be of clinical  
48  
49 339 benefit in colposcopy, particularly in women with low-grade cervical cytology where the prevalence of  
50  
51 340 CIN2+ is low. We also observed an overall lower prevalence of CIN2+ lesions in the EIS cohort compared to  
52  
53 341 a reference cohort with conventional colposcopy. The performance of EIS as an adjunctive technology for  
54  
55 342 colposcopy has not been previously compared by cytology to an external reference cohort. While the  
56  
57 343 observation of lower CIN2+ rate could be explained by different CIN2+ prevalence between the cohorts or  
58  
59  
60

1  
2  
3 344 selection bias, the finding is important and warrants further research, especially along with the observed  
4  
5 345 lower number of biopsies in the EIS cohort. Adjunctive technologies are likely to become increasingly  
6  
7 346 appealing in colposcopy, as the prevalence of high-grade cervical lesions is declining. Randomised  
8  
9  
10 347 controlled trials comparing EIS with a conventional colposcopy, including women referred due to persistent  
11  
12 348 HPV infection without cytological changes are warranted. Before such further evidence, firm  
13  
14 349 recommendations on applicability of EIS as an adjunctive technology for colposcopy cannot be made.

17 350 **Figure 1.** Numbers and rates of CIN2+ lesions detected in the electrical impedance spectroscopy cohort  
18  
19 351 (EIS) and in the reference cohort according to referral cytology. (A) Numbers and rates of CIN2+ detected  
20  
21 352 by ZedScan alone and reference cohort stratified according to referral cytology (B) Numbers and rates of  
22  
23 353 CIN2+ detected by colposcopy alone in EIS and reference cohorts stratified according to referral cytology.  
24  
25  
26 354 Numbers of patients are given in the columns.

#### 29 355 **Contributors**

30  
31  
32 356 PN and IK were responsible for the conceptualisation and design of the study as well as methodology. XC,  
33  
34 357 KL, LKT contributed to conceptualisation. LB performed the statistical analysis with the aid of IK. LB, PN,  
35  
36 358 MK, PLO, SV and AH were responsible for data collection. LB drafted the original manuscript and IK, PN, CR,  
37  
38  
39 359 XC, KL, LKT, AH and KA participated in writing, reviewing and editing. All authors listed qualify for  
40  
41 360 authorship and approved the final version of the paper.

#### 44 361 **Funding**

45  
46  
47 362 This work was supported by the Academy of Finland (IK), the Finnish Medical Foundation (IK), and Finnish  
48  
49 363 State Research Funding (IK).

50  
51  
52  
53 364 **Competing interests** None declared.

54  
55  
56 365 **Patient consent for publication** Not required.  
57  
58  
59  
60



1  
2  
3  
4  
5  
6  
7  
8  
9  
10  
11  
12  
13  
14  
15  
16  
17  
18  
19  
20  
21  
22  
23  
24  
25  
26  
27  
28  
29  
30  
31  
32  
33  
34  
35  
36  
37  
38  
39  
40  
41  
42  
43  
44  
45  
46  
47  
48  
49  
50  
51  
52  
53  
54  
55  
56  
57  
58  
59  
60

**Ethics approval** This study and data collection on patients where EIS was used was considered as a service evaluation and therefore a separate ethical approval was not required as per consultation with Helsinki-Uusimaa Hospital District Ethical Committee. For the historical reference cohort an ethical approval was received from Helsinki-Uusimaa Hospital District Ethical Committee (ref. no. 130/13/03/03/2013).

**Data availability statement** Data are available upon reasonable request.

For peer review only

## References:

- 1 Munro A, Gillespie C, Cotton S, et al. The impact of human papillomavirus type on colposcopy performance in women offered HPV immunisation in a catch-up vaccine programme: a two-centre observational study. *BJOG* 2017;124(9):1394–401.
- 2 Lehtinen M, Pimenoff VN, Nedjai B, et al. Assessing the risk of cervical neoplasia in the post-HPV vaccination era. *Int J Cancer* 2022;(June):1–9.
- 3 Rebolj M, Rimmer J, Denton K, et al. Primary cervical screening with high risk human papillomavirus testing: Observational study. *BMJ* 2019;364:l240.
- 4 Zuchna C, Hager M, Tringler B, et al. Diagnostic accuracy of guided cervical biopsies: A prospective multicenter study comparing the histopathology of simultaneous biopsy and cone specimen. *Am J Obstet Gynecol* 2010;203(4):321.e1-321.e6. Available: <http://dx.doi.org/10.1016/j.ajog.2010.05.033>
- 5 Cantor SB, Cárdenas-Turanzas M, Cox DD, et al. Accuracy of colposcopy in the diagnostic setting compared with the screening setting. *Obstet Gynecol* 2008;111(1):7–14.
- 6 Underwood M, Arbyn M, Parry-Smith W, et al. Accuracy of colposcopy-directed punch biopsies: a systematic review and meta-analysis. *BJOG* 2012;119(11):1293–1301.
- 7 Brown BH, Tidy JA. The diagnostic accuracy of colposcopy – A review of research methodology and impact on the outcomes of quality assurance. *Eur J of Obstet Gynecol Repro Biol* 2019;240(2019):182–6. Available: <https://doi.org/10.1016/j.ejogrb.2019.07.003>
- 8 Demarco M, Lorey TS, Fetterman B, et al. Risks of CIN 2 +, CIN 3 +, and Cancer by Cytology and Human Papillomavirus Status: The Foundation of Risk-Based Cervical Screening Guidelines. *J Low Genit Tract Dis* 2017;21(4):261–7.
- 9 Zilico Ltd. Manchester: Available: <https://zilico.co.uk>
- 10 Tidy JA, Brown BH, Healey TJ, et al. Accuracy of detection of high-grade cervical intraepithelial neoplasia using electrical impedance spectroscopy with colposcopy. *BJOG* 2013;120(4):400–11.

1  
2  
3  
4  
5  
6  
7  
8  
9  
10  
11  
12  
13  
14  
15  
16  
17  
18  
19  
20  
21  
22  
23  
24  
25  
26  
27  
28  
29  
30  
31  
32  
33  
34  
35  
36  
37  
38  
39  
40  
41  
42  
43  
44  
45  
46  
47  
48  
49  
50  
51  
52  
53  
54  
55  
56  
57  
58  
59  
60

- 415 11 Brown BH, Tidy JA, Boston K, et al. Relation between tissue structure and imposed electrical current  
416 flow in cervical neoplasia. *The Lancet* 2000 Mar 11;355(9207):892–5. Available:  
417 [https://doi.org/10.1016/S0140-6736\(99\)09095-9](https://doi.org/10.1016/S0140-6736(99)09095-9)
- 418 12 Balasubramani L, Brown BH, Healey J, et al. The detection of cervical intraepithelial neoplasia by  
419 electrical impedance spectroscopy: The effects of acetic acid and tissue homogeneity. *Gynecol Oncol*  
420 2009;115(2):267–71. Available: <http://dx.doi.org/10.1016/j.ygyno.2009.08.010>
- 421 13 Tidy JA, Brown BH, Lyon RE, et al. Are colposcopy and electrical impedance spectroscopy  
422 complementary when used to detect high-grade cervical neoplasia? *Eur J Gynaecol Oncol*  
423 2018;39(1):70–5.
- 424 14 Muszynski C, Dupont E, Vaysse B, et al. The impact of using electrical impedance spectroscopy  
425 (ZedScan) on the performance of colposcopy in diagnosing high grade squamous lesions of the cervix. *J*  
426 *Gynecol Obstet Hum Reprod* 2017;46(9):669–73. Available:  
427 <http://dx.doi.org/10.1016/j.jogoh.2017.08.007>
- 428 15 Homola W, Fuchs T, Baranski P, et al. Use of electrical impedance spectroscopy as an adjunct to  
429 colposcopy in a pathway of cervical intraepithelial neoplasia diagnostics. *Ginekol Pol* 2019;90(11):628–  
430 32.
- 431 16 Tidy JA, Brown BH. Increased detection of high grade CIN, when using electrical impedance  
432 spectroscopy as an adjunct to routine colposcopy, is maintained when used across international  
433 boundaries: Prospective data from nine European countries. *Eur J Obstet and Gynecol Repro Biol*  
434 2022;275(May):41–5. Available: <https://doi.org/10.1016/j.ejogrb.2022.05.025>
- 435 17 Tsampazis N, Vavoulidis E, Siarkou CM, et al. Diagnostic comparison of electrical impedance  
436 spectroscopy with colposcopy and HPV mRNA-testing in the prediction of CIN2+ women in Greece. *J*  
437 *Obstet Gynaecol Res* 2023 Apr;49(4):1222-1229. doi: 10.1111/jog.15557. Epub 2023 Jan 19. PMID:  
438 36658620.

1  
2  
3  
4  
5  
6  
7  
8  
9  
10  
11  
12  
13  
14  
15  
16  
17  
18  
19  
20  
21  
22  
23  
24  
25  
26  
27  
28  
29  
30  
31  
32  
33  
34  
35  
36  
37  
38  
39  
40  
41  
42  
43  
44  
45  
46  
47  
48  
49  
50  
51  
52  
53  
54  
55  
56  
57  
58  
59  
60

- 439 18 Tidy JA, Lyon R, Ellis K, et al. The impact of age and high-risk human papillomavirus (hrHPV) status on  
440 the prevalence of high-grade cervical intraepithelial neoplasia (CIN2+) in women with persistent hrHPV-  
441 positive, cytology-negative screening samples: a prospective cohort study. *BJOG* 2020;127(10):1260–7.
- 442 19 Macdonald M, Brown B, Lyon R, et al. Influence of high risk HPV genotype on colposcopic performance:  
443 A large prospective study demonstrates improved detection of disease with ZedScan I, particularly in  
444 non-HPV 16 patients. *Eur J Obstet Gynecol Reprod Biol* 2017 Apr;211:194-198. doi:  
445 10.1016/j.ejogrb.2017.02.020. Epub 2017 Feb 20. PMID: 28292693.
- 446 20 National Institute for Health and Care Excellence. NICE Adjunctive colposcopy technologies for  
447 assessing suspected cervical abnormalities: the DYSIS colposcope with DYSISmap and the Zedscan I.  
448 2018. Available: <https://www.nice.org.uk/guidance/dg32> [Accessed 22 Jan 2022].
- 449 21 Aro K, Nieminen P, Louvanto K, et al. Gynecologic Oncology Age-specific HPV type distribution in high-  
450 grade cervical disease in screened and unvaccinated women. *Gynecol Oncol* 2019;154(2):354–9.  
451 Available: <https://doi.org/10.1016/j.ygyno.2019.05.024>
- 452 22 Working group set up by the Finnish Medical Society Duodecim and the Finnish Colposcopy Association.  
453 Cytological Changes in the Cervix, Vagina and Vulva. Current Care Guidelines. The Finnish Medical  
454 Society Duodecim, 2021. Available: [www.kaypahoito.fi](http://www.kaypahoito.fi) [Accessed 17 Jan 2022].
- 455 23 van der Marel J, van Baars R, Quint WGV, et al. The impact of human papillomavirus genotype on  
456 colposcopic appearance: A cross-sectional analysis. *BJOG* 2014;121(9):1117–26.
- 457 24 Pretorius RG, Belinson JL, Burchette RJ, et al. Regardless of skill, performing more biopsies increases the  
458 sensitivity of colposcopy. *J Low Genit Tract Dis* 2011;15(3):180–8.
- 459 25 Wentzensen N, Walker JL, Gold MA, et al. Multiple biopsies and detection of cervical cancer precursors  
460 at colposcopy. *J Clin Oncol* 2015;33(1):83–9.
- 461 26 Moss EL, Hadden P, Douce G, et al. Is the colposcopically directed punch biopsy a reliable diagnostic  
462 test in women with minor cytological lesions? *J Low Genit Tract Dis* 2012;16(4):421–6.

- 1  
2  
3 463 27 Myriokefalitaki E, Redman CWE, Potdar N, et al. The Use of the Colposcopically Directed Punch Biopsy  
4  
5 464 in Clinical Practice: A Survey of British Society of Colposcopy and Cervical Pathology (BSCCP)-Accredited  
6  
7 465 Colposcopists. *J Low Genit Tract Dis* 2016;20(3):234–8.  
9  
10 466 28 Booth B, Petersen L, Blaakaer J, et al. Accuracy of colposcopy-directed biopsy vs dynamic spectral  
11  
12 467 imaging directed biopsy in correctly identifying the grade of cervical dysplasia in women undergoing  
13  
14 468 conization: A methodological study. *Acta Obstet Gynecol Scand* 2020 Aug;99(8):1064-1070. doi:  
15  
16 469 10.1111/aogs.13832. Epub 2020 Mar 9. PMID: 32105344.  
18  
19 470 29 Sherman ME, Castle PE, Solomon D. Cervical cytology of atypical squamous cells-cannot exclude high-  
20  
21 471 grade squamous intraepithelial lesion (ASC-H): Characteristics and histologic outcomes. *Cancer* 2006  
22  
23 472 Oct 25;108(5):298–305.  
25  
26 473 30 Brown BH, Highfield PE, Tidy JA. Prognostic value of electrical impedance spectroscopy (EIS) when used  
27  
28 474 as an adjunct to colposcopy - A longitudinal study. *J Electr Bioimp* 2020;11(1):81–6.  
29  
30  
31  
32  
33  
34  
35  
36  
37  
38  
39  
40  
41  
42  
43  
44  
45  
46  
47  
48  
49  
50  
51  
52  
53  
54  
55  
56  
57  
58  
59  
60

(A)



(B)



review only

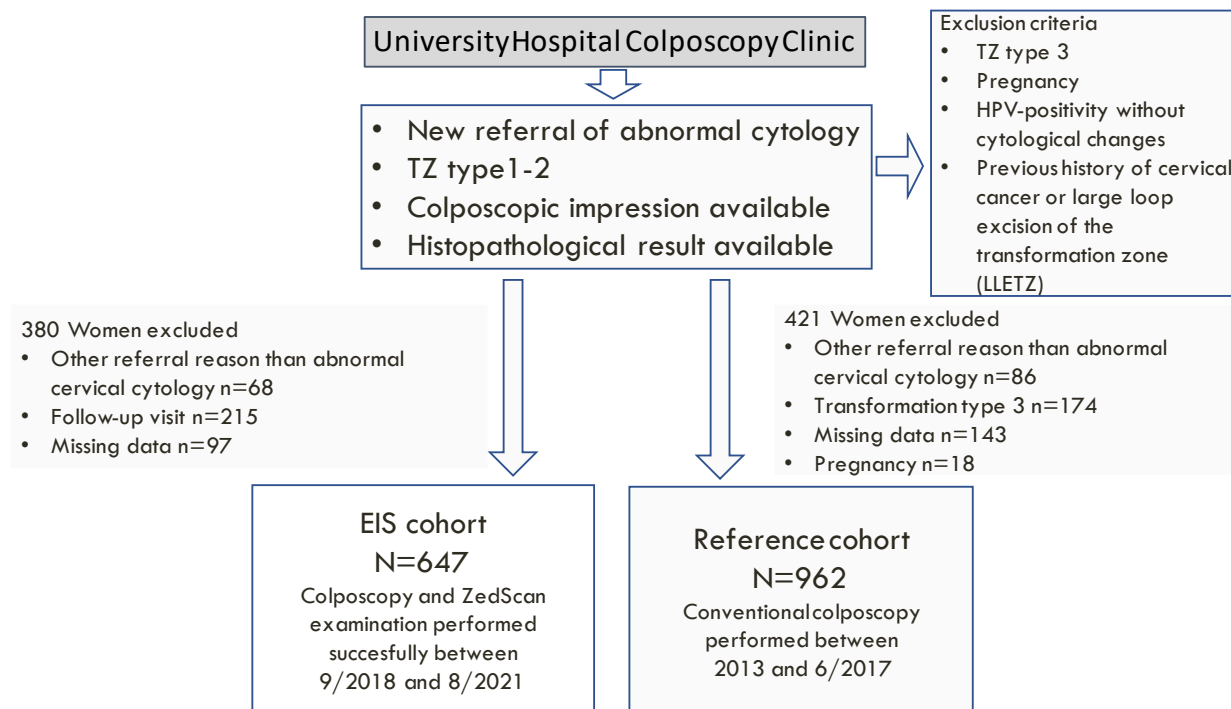

**Figure S1.** Flow-chart of the study comparing the performance of colposcopy by referral cervical cytology in two cohorts with and without electrical impedance spectroscopy as an adjunctive technology.

**Table S1.** Sensitivity, specificity, positive and negative predictive value of the electrical impedance spectroscopy (EIS) cohort and the reference cohort for the detection of CIN2+ lesions within different cervical cytology by TZ type and age group.

|         | EIS cohort (n=647)    |       |             |                       |       |             |           |             |         | Reference cohort (n=962) |             |                    |       |             |             |             |
|---------|-----------------------|-------|-------------|-----------------------|-------|-------------|-----------|-------------|---------|--------------------------|-------------|--------------------|-------|-------------|-------------|-------------|
|         | Colpo+ZS <sup>1</sup> |       |             | Colpo+ZS <sup>3</sup> |       |             |           |             |         | Colpo <sup>2</sup>       |             | Colpo <sup>4</sup> |       |             |             |             |
|         | CIN2+/n               | CIN2+ | Sensitivity | <CIN/n                | <CIN2 | Specificity | PPV       | NPV         | CIN2+/n | CIN2+                    | Sensitivity | <CIN2/n            | <CIN2 | Specificity | PPV         | NPV         |
| ASC-US  | 16/94                 | 15    | 94(70-100)  | 78/94                 | 37    | 47(36-59)   | 27(16-40) | 97(86-100)  | 9/99    | 5                        | 56(21-86)   | 90/99              | 87    | 97(91-99)   | 63(25-92)   | 96(89-99)   |
| TZ1     | 11/66                 | 10    | 91(59-100)  | 55/66                 | 24    | 44(30-58)   | 24(12-40) | 96(80-100)  | 7/57    | 3                        | 43(10-82)   | 50/57              | 47    | 94(84-99)   | 50(12-88)   | 92(81-98)   |
| TZ2     | 5/28                  | 5     | 100(48-100) | 23/28                 | 13    | 57(35-77)   | 33(12-62) | 100(75-100) | 2/42    | 2                        | 100(16-100) | 40/42              | 40    | 100(91-100) | 100(16-100) | 100(91-100) |
| <30 y   | 6/28                  | 5     | 83(36-100)  | 22/28                 | 12    | 55(32-76)   | 33(12-62) | 92(64-100)  | 1/43    | 0                        | 0(0-98)     | 42/43              | 39    | 93(81-99)   | 0(0-71)     | 98(87-100)  |
| 30-44 y | 10/52                 | 10    | 100(69-100) | 42/52                 | 21    | 50(34-66)   | 32(17-51) | 100(84-100) | 7/28    | 4                        | 57(18-90)   | 21/28              | 21    | 100(84-100) | 100(40-100) | 88(68-97)   |
| >45 y   | 0/14                  | 0     | 0           | 14/14                 | 4     | 29          | 0         | 100         | 1/28    | 1                        | 100(3-100)  | 27/28              | 27    | 100(87-100) | 100(3-100)  | 100(87-100) |
| LSIL    | 39/236                | 30    | 77(61-89)   | 197/236               | 82    | 42(35-49)   | 21(14-28) | 90(82-95)   | 72/381  | 31                       | 43(31-55)   | 309/381            | 285   | 92(89-95)   | 56(42-70)   | 87(83-91)   |
| TZ1     | 26/157                | 20    | 77(56-91)   | 131/157               | 53    | 41(32-49)   | 20(13-30) | 90(79-96)   | 53/235  | 23                       | 43(30-58)   | 182/235            | 169   | 93(88-96)   | 64(46-79)   | 85(79-90)   |
| TZ2     | 13/79                 | 10    | 77(46-95)   | 66/79                 | 29    | 44(32-57)   | 21(11-36) | 91(75-98)   | 19/146  | 8                        | 42(20-67)   | 127/146            | 116   | 91(85-96)   | 42(20-67)   | 91(85-96)   |
| <30 y   | 4/39                  | 1     | 25(1-81)    | 35/39                 | 21    | 60(42-76)   | 7(0-32)   | 88(68-97)   | 17/79   | 9                        | 53(28-77)   | 62/79              | 54    | 87(76-94)   | 53(28-77)   | 87(76-94)   |
| 30-44 y | 28/153                | 24    | 86(67-96)   | 125/153               | 46    | 37(28-46)   | 23(16-33) | 92(81-98)   | 46/224  | 19                       | 41(27-57)   | 178/224            | 166   | 93(89-97)   | 61(42-78)   | 86(80-91)   |
| >45 y   | 7/44                  | 5     | 71(29-96)   | 37/44                 | 15    | 41(25-58)   | 19(6-38)  | 88(64-99)   | 9/78    | 3                        | 33(8-70)    | 69/78              | 65    | 94(86-98)   | 43(10-82)   | 92(83-97)   |
| ASC-H   | 85/192                | 84    | 99(94-100)  | 107/192               | 12    | 11(6-19)    | 47(39-55) | 92(64-100)  | 138/237 | 87                       | 63(54-71)   | 99/237             | 64    | 65(54-74)   | 71(62-79)   | 56(46-65)   |
| TZ1     | 57/134                | 56    | 98(91-100)  | 77/134                | 6     | 8(3-16)     | 44(35-53) | 86(42-100)  | 100/167 | 64                       | 64(54-73)   | 67/167             | 42    | 63(50-74)   | 72(61-81)   | 54(42-65)   |
| TZ2     | 28/58                 | 28    | 100(88-100) | 30/58                 | 6     | 20(8-39)    | 54(40-68) | 100(54-100) | 38/70   | 23                       | 61(43-76)   | 32/70              | 22    | 69(50-84)   | 70(51-84)   | 60(42-75)   |
| <30 y   | 24/72                 | 24    | 100(86-100) | 48/72                 | 5     | 10(4-23)    | 36(25-49) | 100(48-100) | 57/90   | 34                       | 60(46-72)   | 33/90              | 18    | 55(36-72)   | 69(55-82)   | 44(29-60)   |
| 30-44 y | 46/90                 | 45    | 98(89-100)  | 44/90                 | 4     | 9(3-22)     | 53(42-64) | 80(28-100)  | 67/120  | 45                       | 67(55-78)   | 53/120             | 37    | 70(56-82)   | 74(61-84)   | 63(49-75)   |
| >45 y   | 15/30                 | 15    | 100(78-100) | 15/30                 | 3     | 20(4-48)    | 56(35-75) | 100(29-100) | 14/27   | 8                        | 57(29-82)   | 13/27              | 9     | 69(39-91)   | 67(35-90)   | 60(32-84)   |
| HSIL    | 77/94                 | 77    | 100(95-100) | 17/94                 | 1     | 6(0-29)     | 83(74-90) | 100(3-100)  | 154/200 | 133                      | 86(80-91)   | 46/200             | 21    | 46(31-61)   | 84(78-90)   | 50(34-66)   |
| TZ1     | 58/67                 | 58    | 100         | 9/67                  | 0     | 0           | 87        | 0           | 104/131 | 88                       | 85(76-91)   | 27/131             | 15    | 56(35-75)   | 88(80-94)   | 48(30-67)   |
| TZ2     | 19/27                 | 19    | 100(82-100) | 8/27                  | 1     | 13(0-53)    | 73(52-88) | 100(3-100)  | 50/69   | 45                       | 90(78-97)   | 19/69              | 6     | 32(13-57)   | 78(65-88)   | 55(23-83)   |
| <30 y   | 25/31                 | 25    | 100         | 6/31                  | 0     | 0           | 81        | 0           | 54/75   | 48                       | 89(77-96)   | 21/75              | 10    | 48(26-70)   | 81(69-90)   | 63(35-85)   |
| 30-44 y | 45/54                 | 45    | 100(92-100) | 9/54                  | 1     | 11(0-48)    | 85(72-93) | 100(3-100)  | 84/102  | 72                       | 86(76-92)   | 18/102             | 9     | 50(26-74)   | 89(80-95)   | 43(22-66)   |
| >45 y   | 7/9                   | 7     | 100         | 2/9                   | 0     | 0           | 78        | 0           | 16/23   | 13                       | 81(54-96)   | 7/23               | 2     | 29(4-71)    | 72(47-90)   | 40(5-85)    |

EIS: electrical impedance spectroscopy; CIN: cervical intraepithelial neoplasia; TZ: transformation zone; PPV: positive predictive value; NPV: negative predictive value; ASC-US: atypical squamous cells of undetermined significance; LSIL: low-grade squamous intraepithelial lesion; HSIL: high-grade squamous intraepithelial lesion; ASC-H: atypical squamous cells that cannot exclude HSIL; AGC-NOS: atypical glandular cells not otherwise specified; AGC-FN: atypical glandular cells that favor neoplasia; LLETZ: large loop excision of the transformation zone; HG: high grade; LG: low grade

<sup>1</sup>Colposcopic impression and/or ZedScan result of CIN2+ of histologically confirmed CIN2+ cases.

<sup>2</sup>Colposcopic impression of CIN2+ of histologically confirmed CIN2+ cases.

<sup>3</sup>Colposcopic impression and ZedScan result less than CIN2 of histologically confirmed cases <CIN2.

<sup>4</sup>Colposcopic impression less than CIN2 of histologically confirmed cases <CIN2



1  
2  
3  
4  
5  
6  
7  
8  
9  
10  
11  
12  
13  
14  
15  
16  
17  
18  
19  
20  
21  
22  
23  
24  
25  
26  
27  
28  
29  
30  
31  
32  
33  
34  
35  
36  
37  
38  
39  
40  
41  
42  
43  
44  
45  
46  
47  
48  
49  
50  
51  
52  
53  
54  
55  
56  
57  
58  
59  
60**Table S2.** Average number of biopsies by cytology in the electrical impedance spectroscopy (EIS) cohort and in the reference cohort.

|        | EIS cohort                 | Reference cohort |
|--------|----------------------------|------------------|
|        | Average number of biopsies |                  |
| ASC-US | 1.7                        | 2.3              |
| LSIL   | 1.8                        | 2.2              |
| ASC-H  | 2.0                        | 2.7              |
| HSIL   | 2.3                        | 2.8              |

ASC-US: atypical squamous cells of undetermined significance; LSIL: low-grade squamous intraepithelial lesion; HSIL: high-grade squamous intraepithelial lesion; ASC-H: atypical squamous cells that cannot exclude HSIL

For peer review only

**Table S3.** Sensitivity, specificity, negative and positive predictive value of the electrical impedance spectroscopy (EIS) cohort and the reference cohort for the detection of CIN2+ lesions by cervical cytology, TZ type and age group.

|             | EIS cohort (n=647) |       |                                |             |         |                                 |             |            |            |         | Reference cohort (n=962) |                             |             |         |                             |             |            |           |  |
|-------------|--------------------|-------|--------------------------------|-------------|---------|---------------------------------|-------------|------------|------------|---------|--------------------------|-----------------------------|-------------|---------|-----------------------------|-------------|------------|-----------|--|
|             | CIN2+/n            | CIN2% | Colpo+ZS<br>CIN2+ <sup>1</sup> | Sensitivity | <CIN2/n | Colpo +ZS<br><CIN2 <sup>3</sup> | Specificity | PPV        | NPV        | CIN2+/n | CIN2%                    | Colpo<br>CIN2+ <sup>2</sup> | Sensitivity | <CIN2/n | Colpo<br><CIN2 <sup>4</sup> | Specificity | PPV        | NPV       |  |
| ASC-US      | 16/94              | 17.0  | 15                             | 94(70-100)  | 78/94   | 37                              | 47(36-59)   | 27(16-40)  | 97(86-100) | 9/99    | 9.1                      | 5                           | 56(21-86)   | 90/99   | 87                          | 97(91-99)   | 63(25-92)  | 96(89-99) |  |
| LSIL        | 39/236             | 16.5  | 30                             | 77(61-89)   | 197/236 | 82                              | 42(35-49)   | 21(14-28)  | 90(82-95)  | 72/381  | 18.9                     | 31                          | 43(31-55)   | 309/381 | 285                         | 92(89-95)   | 56(42-70)  | 87(83-91) |  |
| ASC-H       | 85/192             | 44.3  | 84                             | 99(94-100)  | 107/192 | 12                              | 11(6-19)    | 47(39-55)  | 92(64-100) | 138/237 | 58.2                     | 87                          | 63(54-71)   | 99/237  | 64                          | 65(54-74)   | 71(62-79)  | 56(46-65) |  |
| HSIL        | 77/94              | 81.9  | 77                             | 100(95-100) | 17/94   | 1                               | 6(0-29)     | 83(74-90)  | 100(3-100) | 154/200 | 77.0                     | 133                         | 86(80-91)   | 46/200  | 21                          | 46(31-61)   | 84(78-90)  | 50(34-66) |  |
| AGC-NOS     | 3/28               | 10.7  | 2                              | 67(9-99)    | 25/28   | 11                              | 44(24-65)   | 13(2-38)   | 92(62-100) | 5/28    | 17.9                     | 3                           | 60(15-95)   | 23/28   | 22                          | 96(78-100)  | 75(19-99)  | 92(73-99) |  |
| AGC-FN      | 2/3                | 66.7  | 1                              | 50(1-99)    | 1/3     | 1                               | 100(3-100)  | 100(3-100) | 50(1-99)   | 13/17   | 76.5                     | 8                           | 62(32-86)   | 4/17    | 1                           | 25(1-81)    | 73(39-94)  | 17(0-64)  |  |
| ALL         | 222/647            | 34.3  | 209                            | 94(90-97)   | 425/647 | 144                             | 34(29-39)   | 43(38-47)  | 92(86-96)  | 391/962 | 40.6                     | 267                         | 68(63-73)   | 571/962 | 480                         | 84(81-87)   | 75(70-79)  | 80(76-83) |  |
| TZ1         | 156/446            | 35.0  | 146                            | 94(89-97)   | 290/446 | 90                              | 31(26-37)   | 42(37-48)  | 90(82-95)  | 279/620 | 45.0                     | 187                         | 67(61-73)   | 341/620 | 287                         | 84(80-88)   | 78(72-83)  | 76(71-80) |  |
| TZ2         | 66/201             | 32.8  | 63                             | 96(87-99)   | 135/201 | 54                              | 40(32-49)   | 44(36-52)  | 95(85-99)  | 112/342 | 32.7                     | 80                          | 71(62-80)   | 230/342 | 193                         | 84(79-88)   | 68(59-77)  | 86(81-90) |  |
| <30 y       | 60/175             | 34.3  | 56                             | 93(84-98)   | 115/175 | 40                              | 35(26-44)   | 43(34-52)  | 91(78-98)  | 134/295 | 45.4                     | 96                          | 72(63-79)   | 161/295 | 124                         | 77(70-83)   | 72(64-80)  | 77(69-83) |  |
| 30-44 y     | 131/366            | 35.8  | 124                            | 95(89-98)   | 235/366 | 78                              | 33(27-40)   | 44(38-50)  | 92(84-97)  | 211/495 | 42.6                     | 144                         | 68(62-75)   | 284/495 | 244                         | 86(81-90)   | 78(72-84)  | 79(74-83) |  |
| >45 y       | 31/106             | 29.2  | 29                             | 94(79-99)   | 75/106  | 26                              | 35(24-47)   | 37(27-49)  | 93(77-99)  | 46/172  | 26.7                     | 27                          | 59(43-73)   | 126/172 | 112                         | 89(82-94)   | 66(49-80)  | 86(78-91) |  |
| HG cytology | 164/289            | 56.7  | 162                            | 99(96-100)  | 125/289 | 14                              | 11(6-18)    | 59(53-65)  | 88(62-98)  | 305/454 | 67.2                     | 228                         | 75(70-80)   | 149/454 | 86                          | 58(49-66)   | 78(73-83)  | 53(45-61) |  |
| LG cytology | 58/358             | 16.2  | 47                             | 81(69-90)   | 300/358 | 130                             | 43(38-49)   | 22(16-28)  | 92(87-96)  | 86/508  | 16.9                     | 39                          | 45(35-57)   | 422/508 | 394                         | 93(91-96)   | 58(46-70)  | 89(86-92) |  |
| ASC-H, HSIL | 162/286            | 56.6  | 161                            | 99(97-100)  | 124/286 | 13                              | 11(6-17)    | 59(53-65)  | 93(66-100) | 292/437 | 66.8                     | 220                         | 75(70-80)   | 145/437 | 85                          | 59(50-67)   | 79(73-83)  | 54(46-62) |  |
| ASC-US,LSIL | 55/330             | 16.7  | 45                             | 82(69-91)   | 275/330 | 119                             | 43(37-49)   | 22(17-29)  | 92(86-96)  | 81/480  | 16.9                     | 36                          | 44(33-56)   | 399/480 | 372                         | 93(90-96)   | 57(44-70)  | 89(86-92) |  |
| Glandular   | 5/31               | 16.1  | 3                              | 60(15-95)   | 26/31   | 12                              | 46(27-67)   | 18(4-43)   | 86(57-98)  | 18/45   | 40.0                     | 11                          | 61(36-83)   | 27/45   | 23                          | 85(66-96)   | 73(45-92)  | 77(58-90) |  |
| 1 biopsy    | 11/165             | 6.7   | 7                              | 64(31-89)   | 154/165 | 78                              | 51(43-59)   | 8(4-17)    | 95(88-99)  | 14/109  | 12.8                     | 5                           | 36(13-65)   | 95/109  | 94                          | 99(94-100)  | 83(36-100) | 91(84-96) |  |
| 2 biopsies  | 78/263             | 29.7  | 70                             | 90(81-96)   | 185/263 | 43                              | 23(17-30)   | 33(27-40)  | 84(71-93)  | 112/420 | 26.7                     | 66                          | 59(49-68)   | 308/420 | 276                         | 90(86-93)   | 67(57-77)  | 86(81-89) |  |
| ≥3 biopsies | 43/84              | 51.2  | 43                             | 100         | 41/84   | 0                               | 0           | 51         | 0          | 168/305 | 55.1                     | 113                         | 67(60-74)   | 137/305 | 92                          | 67(59-75)   | 72(64-78)  | 63(54-70) |  |
| LLETZ       | 90/113             | 79.6  | 89                             | 99(94-100)  | 23/113  | 1                               | 4(0-22)     | 80(72-87)  | 50(1-99)   | 97/118  | 82.2                     | 83                          | 86(77-92)   | 21/118  | 8                           | 38(18-62)   | 87(78-93)  | 36(17-59) |  |

EIS: electrical impedance spectroscopy; CIN: cervical intraepithelial neoplasia; TZ: transformation zone; PPV: positive predictive value; NPV: negative predictive value; ASC-US: atypical squamous cells of undetermined significance; LSIL: low-grade squamous intraepithelial lesion; HSIL: high-grade squamous intraepithelial lesion; ASC-H: atypical squamous cells that cannot exclude HSIL; AGC-NOS: atypical glandular cells not otherwise specified; AGC-FN: atypical glandular cells that favor neoplasia; LLETZ: large loop excision of the transformation zone; HG: high grade; LG: low grade

<sup>1</sup>Colposcopic impression and/or ZedScan result of CIN2+ of histologically confirmed CIN2+ cases.

<sup>2</sup>Colposcopic impression of CIN2+ of histologically confirmed CIN2+ cases.

<sup>3</sup>Colposcopic impression and ZedScan result less than CIN2 of histologically confirmed cases <CIN2.

<sup>4</sup>Colposcopic impression less than CIN2 of histologically confirmed cases <CIN2

1  
2  
3  
4  
5  
6  
7  
8  
9  
10  
11  
12  
13  
14  
15  
16  
17  
18  
19  
20  
21  
22  
23  
24  
25  
26  
27  
28  
29  
30  
31  
32  
33  
34  
35  
36  
37  
38  
39  
40  
41  
42  
43  
44  
45  
46

**Table S4.** Sensitivity and specificity of the electrical impedance spectroscopy cohort (EIS) and the reference cohort by cytology, TZ type and age group in identifying CIN2+, with corresponding risk differences and the risk ratios of sensitivity and specificity.

|             | EIS         |             | Sensitivity                        |                       |         | EIS         |             | Specificity                        |                       |         |
|-------------|-------------|-------------|------------------------------------|-----------------------|---------|-------------|-------------|------------------------------------|-----------------------|---------|
|             | Sensitivity | Sensitivity | Risk difference (95%) <sup>1</sup> | RR (95%) <sup>1</sup> | p.      | Specificity | Specificity | Risk difference (95%) <sup>1</sup> | RR (95%) <sup>1</sup> | p.      |
| ASC-US      | 94(70-100)  | 56(21-86)   | 0.38(0.04-0.73)                    | 1.69(0.93-3.07)       | 0.0219  | 47(36-59)   | 97(91-99)   | -0.49(-0.61--0.38)                 | 0.49(0.39-0.62)       | <0.0001 |
| LSIL        | 77(61-89)   | 43(31-55)   | 0.34(0.16-0.51)                    | 1.79(1.30-2.45)       | 0.0006  | 42(35-49)   | 92(89-95)   | -0.51(-0.58--0.43)                 | 0.45(0.38-0.53)       | <0.0001 |
| ASC-H       | 99(94-100)  | 63(54-71)   | 0.36(0.27-0.44)                    | 1.57(1.38-1.78)       | <0.0001 | 11(6-19)    | 65(54-74)   | -0.53(-0.65--0.42)                 | 0.17(0.10-0.30)       | <0.0001 |
| HSIL        | 100(95-100) | 86(80-91)   | 0.14(0.08-0.19)                    | 1.16(1.09-1.23)       | 0.0007  | 6(0-29)     | 46(31-61)   | -0.40(-0.58--0.22)                 | 0.13(0.02-0.89)       | 0.0033  |
| AGC-NOS     | 67(9-99)    | 60(15-95)   | 0.07(-0.62-0.75)                   | 1.11(0.38-3.25)       | 0.8504  | 44(24-65)   | 96(78-100)  | -0.52(-0.73--0.30)                 | 0.46(0.29-0.72)       | 0.0001  |
| AGC-FN      | 50(1-99)    | 62(32-86)   | -0.12(-0.86-0.63)                  | 0.81(0.19-3.47)       | 0.7565  | 100(3-100)  | 25(1-81)    | 0.75(0.33-1.17)                    | 4.0(0.73-21.84)       | 0.1709  |
| ALL         | 94(90-97)   | 68(63-73)   | 0.26(0.20-0.31)                    | 1.38(1.28-1.49)       | <0.0001 | 34(29-39)   | 84(81-87)   | -0.50(-0.56--0.45)                 | 0.40(0.35-0.46)       | <0.0001 |
| TZ1         | 94(89-97)   | 67(61-73)   | 0.27(0.20-0.33)                    | 1.40(1.27-1.53)       | <0.0001 | 31(26-37)   | 84(80-88)   | -0.53(-0.60--0.47)                 | 0.37(0.31-0.44)       | <0.0001 |
| TZ2         | 96(87-99)   | 71(62-80)   | 0.24(0.14-0.34)                    | 1.34(1.18-1.57)       | 0.0001  | 40(32-49)   | 84(79-88)   | -0.44(-0.53--0.34)                 | 0.48(0.38-0.59)       | <0.0001 |
| <30 y       | 93(84-98)   | 72(63-79)   | 0.22(0.12-0.32)                    | 1.30(1.15-1.48)       | 0.0007  | 35(26-44)   | 77(70-83)   | -0.42(-0.53--0.31)                 | 0.45(0.35-0.59)       | <0.0001 |
| 30-44 y     | 95(89-98)   | 68(62-75)   | 0.26(0.19-0.34)                    | 1.39(1.25-1.53)       | <0.0001 | 33(27-40)   | 86(81-90)   | -0.53(-0.60--0.45)                 | 0.39(0.32-0.47)       | <0.0001 |
| ≥45 y       | 94(79-99)   | 59(43-73)   | 0.35(0.18-0.52)                    | 1.59(1.23-2.07)       | 0.0008  | 35(24-47)   | 89(82-94)   | -0.54(-0.66--0.42)                 | 0.39(0.28-0.54)       | <0.0001 |
| HG cytology | 99(96-100)  | 75(70-80)   | 0.24(0.19-0.29)                    | 1.32(1.24-1.41)       | <0.0001 | 11(6-18)    | 58(49-66)   | -0.47(-0.56--0.37)                 | 0.19(0.12-0.32)       | <0.0001 |
| LG cytology | 81(69-90)   | 45(35-57)   | 0.36(0.21-0.50)                    | 1.79(1.37-2.33)       | <0.0001 | 43(38-49)   | 93(91-96)   | -0.50(-0.56--0.44)                 | 0.46(0.41-0.53)       | <0.0001 |
| 1 biopsy    | 64(31-89)   | 36(13-65)   | 0.28(-0.10-0.66)                   | 1.78(0.77-4.10)       | 0.1654  | 51(43-59)   | 99(94-100)  | -0.48(-0.56--0.40)                 | 0.51(0.44-0.60)       | <0.0001 |
| 2 biopsies  | 90(81-96)   | 59(49-68)   | 0.31(0.19-0.42)                    | 1.52(1.28-1.81)       | <0.0001 | 23(17-30)   | 90(86-93)   | -0.66(-0.73--0.59)                 | 0.26(0.20-0.34)       | <0.0001 |
| ≥3 biopsies | 100         | 67(60-74)   | 0.33(0.26-0.40)                    | 1.49(1.34-1.65)       | <0.0001 | 0           | 67(59-75)   | -0.67(-0.75--0.59)                 | 0                     | <0.0001 |

EIS: electrical impedance spectroscopy; CIN: cervical intraepithelial neoplasia; TZ: transformation zone; ASC-US: atypical squamous cells of undetermined significance; LSIL: low-grade squamous intraepithelial lesion; HSIL: high-grade squamous intraepithelial lesion; ASC-H: atypical squamous cells that cannot exclude HSIL; AGC-NOS: atypical glandular cells not otherwise specified; AGC-FN: atypical glandular cells that favor neoplasia; HG: high grade; LG: low grade

<sup>1</sup>The values of risk difference >0 or the values of risk ratio >1 imply better/improved effect with ZedScan.

| Section & Topic          | No         | Item                                                                                                                                                   | Reported on page #                      |
|--------------------------|------------|--------------------------------------------------------------------------------------------------------------------------------------------------------|-----------------------------------------|
| <b>TITLE OR ABSTRACT</b> |            |                                                                                                                                                        |                                         |
|                          | <b>1</b>   | Identification as a study of diagnostic accuracy using at least one measure of accuracy (such as sensitivity, specificity, predictive values, or AUC)  | 2                                       |
| <b>ABSTRACT</b>          |            |                                                                                                                                                        |                                         |
|                          | <b>2</b>   | Structured summary of study design, methods, results, and conclusions (for specific guidance, see STARD for Abstracts)                                 | 2                                       |
| <b>INTRODUCTION</b>      |            |                                                                                                                                                        |                                         |
|                          | <b>3</b>   | Scientific and clinical background, including the intended use and clinical role of the index test                                                     | 4-5                                     |
|                          | <b>4</b>   | Study objectives and hypotheses                                                                                                                        | 4-5                                     |
| <b>METHODS</b>           |            |                                                                                                                                                        |                                         |
| <i>Study design</i>      | <b>5</b>   | Whether data collection was planned before the index test and reference standard were performed (prospective study) or after (retrospective study)     | 5-6                                     |
| <i>Participants</i>      | <b>6</b>   | Eligibility criteria                                                                                                                                   | 5-6                                     |
|                          | <b>7</b>   | On what basis potentially eligible participants were identified (such as symptoms, results from previous tests, inclusion in registry)                 | 5-6                                     |
|                          | <b>8</b>   | Where and when potentially eligible participants were identified (setting, location and dates)                                                         | 5-6                                     |
|                          | <b>9</b>   | Whether participants formed a consecutive, random or convenience series                                                                                | 5-6                                     |
| <i>Test methods</i>      | <b>10a</b> | Index test, in sufficient detail to allow replication                                                                                                  | 6                                       |
|                          | <b>10b</b> | Reference standard, in sufficient detail to allow replication                                                                                          | 6                                       |
|                          | <b>11</b>  | Rationale for choosing the reference standard (if alternatives exist)                                                                                  | 5-6                                     |
|                          | <b>12a</b> | Definition of and rationale for test positivity cut-offs or result categories of the index test, distinguishing pre-specified from exploratory         | 7                                       |
|                          | <b>12b</b> | Definition of and rationale for test positivity cut-offs or result categories of the reference standard, distinguishing pre-specified from exploratory | 7                                       |
|                          | <b>13a</b> | Whether clinical information and reference standard results were available to the performers/readers of the index test                                 | 6                                       |
|                          | <b>13b</b> | Whether clinical information and index test results were available to the assessors of the reference standard                                          | 5-6                                     |
| <i>Analysis</i>          | <b>14</b>  | Methods for estimating or comparing measures of diagnostic accuracy                                                                                    | 7                                       |
|                          | <b>15</b>  | How indeterminate index test or reference standard results were handled                                                                                | 5-6                                     |
|                          | <b>16</b>  | How missing data on the index test and reference standard were handled                                                                                 | 5-6                                     |
|                          | <b>17</b>  | Any analyses of variability in diagnostic accuracy, distinguishing pre-specified from exploratory                                                      | 7                                       |
|                          | <b>18</b>  | Intended sample size and how it was determined                                                                                                         | 5-6                                     |
| <b>RESULTS</b>           |            |                                                                                                                                                        |                                         |
| <i>Participants</i>      | <b>19</b>  | Flow of participants, using a diagram                                                                                                                  | Figure S1, submitted as a separate file |
|                          | <b>20</b>  | Baseline demographic and clinical characteristics of participants                                                                                      | 9, Table 1                              |
|                          | <b>21a</b> | Distribution of severity of disease in those with the target condition                                                                                 | 9, Table 1                              |
|                          | <b>21b</b> | Distribution of alternative diagnoses in those without the target condition                                                                            | 9, Table 1                              |
|                          | <b>22</b>  | Time interval and any clinical interventions between index test and reference standard                                                                 | 5-6                                     |
| <i>Test results</i>      | <b>23</b>  | Cross tabulation of the index test results (or their distribution) by the results of the reference standard                                            | 9,10,11 Table1-3, Table S3-4            |
|                          | <b>24</b>  | Estimates of diagnostic accuracy and their precision (such as 95% confidence intervals)                                                                | 10,11 Table 2-3, Table S3-4             |
|                          | <b>25</b>  | Any adverse events from performing the index test or the reference standard                                                                            | NA                                      |
| <b>DISCUSSION</b>        |            |                                                                                                                                                        |                                         |
|                          | <b>26</b>  | Study limitations, including sources of potential bias, statistical uncertainty, and generalisability                                                  | 13-16                                   |
|                          | <b>27</b>  | Implications for practice, including the intended use and clinical role of the index test                                                              | 15-16                                   |
| <b>OTHER INFORMATION</b> |            |                                                                                                                                                        |                                         |

1  
2  
3  
4  
5  
6  
7  
8  
9  
10  
11  
12  
13  
14  
15  
16  
17  
18  
19  
20  
21  
22  
23  
24  
25  
26  
27  
28  
29  
30  
31  
32  
33  
34  
35  
36  
37  
38  
39  
40  
41  
42  
43  
44  
45  
46  
47  
48  
49  
50  
51  
52  
53  
54  
55  
56  
57  
58  
59  
60

|           |                                                       |                                   |
|-----------|-------------------------------------------------------|-----------------------------------|
| <b>28</b> | Registration number and name of registry              | 6 ISRCTN for the reference cohort |
| <b>29</b> | Where the full study protocol can be accessed         | Submitted as a separate file      |
| <b>30</b> | Sources of funding and other support; role of funders | 16                                |

For peer review only

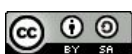

# STARD 2015

---

## AIM

STARD stands for “Standards for Reporting Diagnostic accuracy studies”. This list of items was developed to contribute to the completeness and transparency of reporting of diagnostic accuracy studies. Authors can use the list to write informative study reports. Editors and peer-reviewers can use it to evaluate whether the information has been included in manuscripts submitted for publication.

---

## EXPLANATION

A **diagnostic accuracy study** evaluates the ability of one or more medical tests to correctly classify study participants as having a **target condition**. This can be a disease, a disease stage, response or benefit from therapy, or an event or condition in the future. A medical test can be an imaging procedure, a laboratory test, elements from history and physical examination, a combination of these, or any other method for collecting information about the current health status of a patient.

The test whose accuracy is evaluated is called **index test**. A study can evaluate the accuracy of one or more index tests. Evaluating the ability of a medical test to correctly classify patients is typically done by comparing the distribution of the index test results with those of the **reference standard**. The reference standard is the best available method for establishing the presence or absence of the target condition. An accuracy study can rely on one or more reference standards.

If test results are categorized as either positive or negative, the cross tabulation of the index test results against those of the reference standard can be used to estimate the **sensitivity** of the index test (the proportion of participants *with* the target condition who have a positive index test), and its **specificity** (the proportion *without* the target condition who have a negative index test). From this cross tabulation (sometimes referred to as the contingency or “2x2” table), several other accuracy statistics can be estimated, such as the positive and negative **predictive values** of the test. Confidence intervals around estimates of accuracy can then be calculated to quantify the statistical **precision** of the measurements.

If the index test results can take more than two values, categorization of test results as positive or negative requires a **test positivity cut-off**. When multiple such cut-offs can be defined, authors can report a receiver operating characteristic (ROC) curve which graphically represents the combination of sensitivity and specificity for each possible test positivity cut-off. The **area under the ROC curve** informs in a single numerical value about the overall diagnostic accuracy of the index test.

The **intended use** of a medical test can be diagnosis, screening, staging, monitoring, surveillance, prediction or prognosis. The **clinical role** of a test explains its position relative to existing tests in the clinical pathway. A replacement test, for example, replaces an existing test. A triage test is used before an existing test; an add-on test is used after an existing test.

Besides diagnostic accuracy, several other outcomes and statistics may be relevant in the evaluation of medical tests. Medical tests can also be used to classify patients for purposes other than diagnosis, such as staging or prognosis. The STARD list was not explicitly developed for these other outcomes, statistics, and study types, although most STARD items would still apply.

---

## DEVELOPMENT

This STARD list was released in 2015. The 30 items were identified by an international expert group of methodologists, researchers, and editors. The guiding principle in the development of STARD was to select items that, when reported, would help readers to judge the potential for bias in the study, to appraise the applicability of the study findings and the validity of conclusions and recommendations. The list represents an update of the first version, which was published in 2003.

More information can be found on <http://www.equator-network.org/reporting-guidelines/stard>.

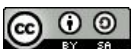

Supplement: bmjopen-2023-074921.draft_revisions.pdf [file bmjopen-2023-074921.draft_revisions.pdf]
