# Supplementary material for: Added value of electrical impedance spectroscopy in adjunction of colposcopy: a prospective cohort study
Source: PubMed Central journal article supplement (PMC10619076; doi:10.1136/bmjopen-2023-074921), 2023-10-29
Supplement: bmjopen-2023-074921supp002.pdf [file bmjopen-2023-074921supp002.pdf]

**Table S1** Sensitivity, specificity, negative and positive predictive value of the electrical impedance spectroscopy (EIS) cohort and the reference cohort for the detection of CIN2+ lesions by cervical cytology, TZ type and age group.

|             | EIS cohort (n=647) |       |                    |             |         |                    |             |            |            | Reference cohort (n=962) |       |                    |             |         |                    |             |            |           |
|-------------|--------------------|-------|--------------------|-------------|---------|--------------------|-------------|------------|------------|--------------------------|-------|--------------------|-------------|---------|--------------------|-------------|------------|-----------|
|             | Colpo+ZS           |       |                    | Colpo +ZS   |         |                    |             |            |            | Colpo                    |       |                    | Colpo       |         |                    |             |            |           |
|             | CIN2+/n            | CIN2% | CIN2+ <sup>1</sup> | Sensitivity | <CIN2/n | <CIN2 <sup>3</sup> | Specificity | PPV        | NPV        | CIN2+/n                  | CIN2% | CIN2+ <sup>2</sup> | Sensitivity | <CIN2/n | <CIN2 <sup>4</sup> | Specificity | PPV        | NPV       |
| ALL         | 222/647            | 34.3  | 209                | 94(90-97)   | 425/647 | 144                | 34(29-39)   | 43(38-47)  | 92(86-96)  | 391/962                  | 40.6  | 267                | 68(63-73)   | 571/962 | 480                | 84(81-87)   | 75(70-79)  | 80(76-83) |
| ASC-US      | 16/94              | 17.0  | 15                 | 94(70-100)  | 78/94   | 37                 | 47(36-59)   | 27(16-40)  | 97(86-100) | 9/99                     | 9.1   | 5                  | 56(21-86)   | 90/99   | 87                 | 97(91-99)   | 63(25-92)  | 96(89-99) |
| LSIL        | 39/236             | 16.5  | 30                 | 77(61-89)   | 197/236 | 82                 | 42(35-49)   | 21(14-28)  | 90(82-95)  | 72/381                   | 18.9  | 31                 | 43(31-55)   | 309/381 | 285                | 92(89-95)   | 56(42-70)  | 87(83-91) |
| ASC-H       | 85/192             | 44.3  | 84                 | 99(94-100)  | 107/192 | 12                 | 11(6-19)    | 47(39-55)  | 92(64-100) | 138/237                  | 58.2  | 87                 | 63(54-71)   | 99/237  | 64                 | 65(54-74)   | 71(62-79)  | 56(46-65) |
| HSIL        | 77/94              | 81.9  | 77                 | 100(95-100) | 17/94   | 1                  | 6(0-29)     | 83(74-90)  | 100(3-100) | 154/200                  | 77.0  | 133                | 86(80-91)   | 46/200  | 21                 | 46(31-61)   | 84(78-90)  | 50(34-66) |
| AGC-NOS     | 3/28               | 10.7  | 2                  | 67(9-99)    | 25/28   | 11                 | 44(24-65)   | 13(2-38)   | 92(62-100) | 5/28                     | 17.9  | 3                  | 60(15-95)   | 23/28   | 22                 | 96(78-100)  | 75(19-99)  | 92(73-99) |
| AGC-FN      | 2/3                | 66.7  | 1                  | 50(1-99)    | 1/3     | 1                  | 100(3-100)  | 100(3-100) | 50(1-99)   | 13/17                    | 76.5  | 8                  | 62(32-86)   | 4/17    | 1                  | 25(1-81)    | 73(39-94)  | 17(0-64)  |
| TZ1         | 156/446            | 35.0  | 146                | 94(89-97)   | 290/446 | 90                 | 31(26-37)   | 42(37-48)  | 90(82-95)  | 279/620                  | 45.0  | 187                | 67(61-73)   | 341/620 | 287                | 84(80-88)   | 78(72-83)  | 76(71-80) |
| TZ2         | 66/201             | 32.8  | 63                 | 95(87-99)   | 135/201 | 54                 | 40(32-49)   | 44(36-52)  | 95(85-99)  | 112/342                  | 32.7  | 80                 | 71(62-80)   | 230/342 | 193                | 84(79-88)   | 68(59-77)  | 86(81-90) |
| <30 y       | 60/175             | 34.3  | 56                 | 93(84-98)   | 115/175 | 40                 | 35(26-44)   | 43(34-52)  | 91(78-98)  | 134/295                  | 45.4  | 96                 | 72(63-79)   | 161/295 | 124                | 77(70-83)   | 72(64-80)  | 77(69-83) |
| 30-44 y     | 131/366            | 35.8  | 124                | 95(89-98)   | 235/366 | 78                 | 33(27-40)   | 44(38-50)  | 92(84-97)  | 211/495                  | 42.6  | 144                | 68(62-75)   | 284/495 | 244                | 86(81-90)   | 78(72-84)  | 79(74-83) |
| ≥ 45 y      | 31/106             | 29.2  | 29                 | 94(79-99)   | 75/106  | 26                 | 35(24-47)   | 37(27-49)  | 93(77-99)  | 46/172                   | 26.7  | 27                 | 59(43-73)   | 126/172 | 112                | 89(82-94)   | 66(49-80)  | 86(78-91) |
| HG cytology | 164/289            | 56.7  | 162                | 99(96-100)  | 125/289 | 14                 | 11(6-18)    | 59(53-65)  | 88(62-98)  | 305/454                  | 67.2  | 228                | 75(70-80)   | 149/454 | 86                 | 58(49-66)   | 78(73-83)  | 53(45-61) |
| LG cytology | 58/358             | 16.2  | 47                 | 81(69-90)   | 300/358 | 130                | 43(38-49)   | 22(16-28)  | 92(87-96)  | 86/508                   | 16.9  | 39                 | 45(35-57)   | 422/508 | 394                | 93(91-96)   | 58(46-70)  | 89(86-92) |
| ASC-H, HSIL | 162/286            | 56.6  | 161                | 99(97-100)  | 124/286 | 13                 | 10(6-17)    | 59(53-65)  | 93(66-100) | 292/437                  | 66.8  | 220                | 75(70-80)   | 145/437 | 85                 | 59(50-67)   | 79(73-83)  | 54(46-62) |
| ASC-US,LSIL | 55/330             | 16.7  | 45                 | 82(69-91)   | 275/330 | 119                | 43(37-49)   | 22(17-29)  | 92(86-96)  | 81/480                   | 16.9  | 36                 | 44(33-56)   | 399/480 | 372                | 93(90-96)   | 57(44-70)  | 89(86-92) |
| Glandular   | 5/31               | 16.1  | 3                  | 60(15-95)   | 26/31   | 12                 | 46(27-67)   | 18(4-43)   | 86(57-98)  | 18/45                    | 40.0  | 11                 | 61(36-83)   | 27/45   | 23                 | 85(66-96)   | 73(45-92)  | 77(58-90) |
| 1 biopsy    | 11/165             | 6.7   | 7                  | 64(31-89)   | 154/165 | 78                 | 51(43-59)   | 8(4-17)    | 95(88-99)  | 14/109                   | 12.8  | 5                  | 36(13-65)   | 95/109  | 94                 | 99(94-100)  | 83(36-100) | 91(84-96) |
| 2 biopsies  | 78/263             | 29.7  | 70                 | 90(81-96)   | 185/263 | 43                 | 23(17-30)   | 33(27-40)  | 84(71-93)  | 112/420                  | 26.7  | 66                 | 59(49-68)   | 308/420 | 276                | 90(86-93)   | 67(57-77)  | 86(81-89) |
| ≥3 biopsies | 43/84              | 51.2  | 43                 | 100         | 41/84   | 0                  | 0           | 51         | 0          | 168/305                  | 55.1  | 113                | 67(60-74)   | 137/305 | 92                 | 67(59-75)   | 72(64-78)  | 63(54-70) |
| LLETZ       | 90/113             | 79.6  | 89                 | 99(94-100)  | 23/113  | 1                  | 4(0-22)     | 80(72-87)  | 50(1-99)   | 97/118                   | 82.2  | 83                 | 86(77-92)   | 21/118  | 8                  | 38(18-62)   | 87(78-93)  | 36(17-59) |

<sup>1</sup>Colposcopic impression and/or ZedScan result of CIN2+ of histologically confirmed CIN2+ cases.<sup>2</sup>Colposcopic impression of CIN2+ of histologically confirmed CIN2+ cases.<sup>3</sup>Colposcopic impression and ZedScan result less than CIN2 of histologically confirmed cases <CIN2.<sup>4</sup>Colposcopic impression less than CIN2 of histologically confirmed cases <CIN2

AGC-FN: atypical glandular cells that favour neoplasia; AGC-NOS: atypical glandular cells not otherwise specified; ASC-H: atypical squamous cells that cannot exclude HSIL; ASC-US: atypical squamous cells of undetermined significance CIN: cervical intraepithelial neoplasia; HG: high grade; HSIL: high-grade squamous intraepithelial lesion; LG: low grade; LLETZ: large loop excision of the transformation zone; LSIL: low-grade squamous intraepithelial lesion; NPV: negative predictive value; PPV: positive predictive value; TZ: transformation zone
