# Supplementary material for: Added value of electrical impedance spectroscopy in adjunction of colposcopy: a prospective cohort study
Source: PubMed Central journal article supplement (PMC10619076; doi:10.1136/bmjopen-2023-074921), 2023-10-29
Supplement: bmjopen-2023-074921supp003.pdf [file bmjopen-2023-074921supp003.pdf]

**Table S2** Sensitivity, specificity, positive and negative predictive value of the electrical impedance spectroscopy (EIS) cohort and the reference cohort for the detection of CIN2+ lesions within different cervical cytology by TZ type and age group.

|         | EIS cohort (n=647)    |       |                       |         |       |             |                    |             | Reference cohort (n=962) |       |             |         |       |             |             |             |
|---------|-----------------------|-------|-----------------------|---------|-------|-------------|--------------------|-------------|--------------------------|-------|-------------|---------|-------|-------------|-------------|-------------|
|         | Colpo+ZS <sup>1</sup> |       | Colpo+ZS <sup>3</sup> |         |       |             | Colpo <sup>2</sup> |             | Colpo <sup>4</sup>       |       |             |         |       |             |             |             |
|         | CIN2+/n               | CIN2+ | Sensitivity           | <CIN/n  | <CIN2 | Specificity | PPV                | NPV         | CIN2+/n                  | CIN2+ | Sensitivity | <CIN2/n | <CIN2 | Specificity | PPV         | NPV         |
| ASC-US  | 16/94                 | 15    | 94(70-100)            | 78/94   | 37    | 47(36-59)   | 27(16-40)          | 97(86-100)  | 9/99                     | 5     | 56(21-86)   | 90/99   | 87    | 97(91-99)   | 63(25-92)   | 96(89-99)   |
| TZ1     | 11/66                 | 10    | 91(59-100)            | 55/66   | 24    | 44(30-58)   | 24(12-40)          | 96(80-100)  | 7/57                     | 3     | 43(10-82)   | 50/57   | 47    | 94(84-99)   | 50(12-88)   | 92(81-98)   |
| TZ2     | 5/28                  | 5     | 100(48-100)           | 23/28   | 13    | 57(35-77)   | 33(12-62)          | 100(75-100) | 2/42                     | 2     | 100(16-100) | 40/42   | 40    | 100(91-100) | 100(16-100) | 100(91-100) |
| <30 y   | 6/28                  | 5     | 83(36-100)            | 22/28   | 12    | 55(32-76)   | 33(12-62)          | 92(64-100)  | 1/43                     | 0     | 0(0-98)     | 42/43   | 39    | 93(81-99)   | 0(0-71)     | 98(87-100)  |
| 30-44 y | 10/52                 | 10    | 100(69-100)           | 42/52   | 21    | 50(34-66)   | 32(17-51)          | 100(84-100) | 7/28                     | 4     | 57(18-90)   | 21/28   | 21    | 100(84-100) | 100(40-100) | 88(68-97)   |
| ≥45 y   | 0/14                  | 0     | 0                     | 14/14   | 4     | 29          | 0                  | 100         | 1/28                     | 1     | 100(3-100)  | 27/28   | 27    | 100(87-100) | 100(3-100)  | 100(87-100) |
| LSIL    | 39/236                | 30    | 77(61-89)             | 197/236 | 82    | 42(35-49)   | 21(14-28)          | 90(82-95)   | 72/381                   | 31    | 43(31-55)   | 309/381 | 285   | 92(89-95)   | 56(42-70)   | 87(83-91)   |
| TZ1     | 26/157                | 20    | 77(56-91)             | 131/157 | 53    | 41(32-49)   | 20(13-30)          | 90(79-96)   | 53/235                   | 23    | 43(30-58)   | 182/235 | 169   | 93(88-96)   | 64(46-79)   | 85(79-90)   |
| TZ2     | 13/79                 | 10    | 77(46-95)             | 66/79   | 29    | 44(32-57)   | 21(11-36)          | 91(75-98)   | 19/146                   | 8     | 42(20-67)   | 127/146 | 116   | 91(85-96)   | 42(20-67)   | 91(85-96)   |
| <30 y   | 4/39                  | 1     | 25(1-81)              | 35/39   | 21    | 60(42-76)   | 7(0-32)            | 88(68-97)   | 17/79                    | 9     | 53(28-77)   | 62/79   | 54    | 87(76-94)   | 53(28-77)   | 87(76-94)   |
| 30-44 y | 28/153                | 24    | 86(67-96)             | 125/153 | 46    | 37(28-46)   | 23(16-33)          | 92(81-98)   | 46/224                   | 19    | 41(27-57)   | 178/224 | 166   | 93(89-97)   | 61(42-78)   | 86(80-91)   |
| ≥45 y   | 7/44                  | 5     | 71(29-96)             | 37/44   | 15    | 41(25-58)   | 19(6-38)           | 88(64-99)   | 9/78                     | 3     | 33(8-70)    | 69/78   | 65    | 94(86-98)   | 43(10-82)   | 92(83-97)   |
| ASC-H   | 85/192                | 84    | 99(94-100)            | 107/192 | 12    | 11(6-19)    | 47(39-55)          | 92(64-100)  | 138/237                  | 87    | 63(54-71)   | 99/237  | 64    | 65(54-74)   | 71(62-79)   | 56(46-65)   |
| TZ1     | 57/134                | 56    | 98(91-100)            | 77/134  | 6     | 8(3-16)     | 44(35-53)          | 86(42-100)  | 100/167                  | 64    | 64(54-73)   | 67/167  | 42    | 63(50-74)   | 72(61-81)   | 54(42-65)   |
| TZ2     | 28/58                 | 28    | 100(88-100)           | 30/58   | 6     | 20(8-39)    | 54(40-68)          | 100(54-100) | 38/70                    | 23    | 61(43-76)   | 32/70   | 22    | 69(50-84)   | 70(51-84)   | 60(42-75)   |
| <30 y   | 24/72                 | 24    | 100(86-100)           | 48/72   | 5     | 10(4-23)    | 36(25-49)          | 100(48-100) | 57/90                    | 34    | 60(46-72)   | 33/90   | 18    | 55(36-72)   | 69(55-82)   | 44(29-60)   |
| 30-44 y | 46/90                 | 45    | 98(89-100)            | 44/90   | 4     | 9(3-22)     | 53(42-64)          | 80(28-100)  | 67/120                   | 45    | 67(55-78)   | 53/120  | 37    | 70(56-82)   | 74(61-84)   | 63(49-75)   |
| ≥45 y   | 15/30                 | 15    | 100(78-100)           | 15/30   | 3     | 20(4-48)    | 56(35-75)          | 100(29-100) | 14/27                    | 8     | 57(29-82)   | 13/27   | 9     | 69(39-91)   | 67(35-90)   | 60(32-84)   |
| HSIL    | 77/94                 | 77    | 100(95-100)           | 17/94   | 1     | 6(0-29)     | 83(74-90)          | 100(3-100)  | 154/200                  | 133   | 86(80-91)   | 46/200  | 21    | 46(31-61)   | 84(78-90)   | 50(34-66)   |
| TZ1     | 58/67                 | 58    | 100                   | 9/67    | 0     | 0           | 87                 | 0           | 104/131                  | 88    | 85(76-91)   | 27/131  | 15    | 56(35-75)   | 88(80-94)   | 48(30-67)   |
| TZ2     | 19/27                 | 19    | 100(82-100)           | 8/27    | 1     | 13(0-53)    | 73(52-88)          | 100(3-100)  | 50/69                    | 45    | 90(78-97)   | 19/69   | 6     | 32(13-57)   | 78(65-88)   | 55(23-83)   |
| <30 y   | 25/31                 | 25    | 100                   | 6/31    | 0     | 0           | 81                 | 0           | 54/75                    | 48    | 89(77-96)   | 21/75   | 10    | 48(26-70)   | 81(69-90)   | 63(35-85)   |
| 30-44 y | 45/54                 | 45    | 100(92-100)           | 9/54    | 1     | 11(0-48)    | 85(72-93)          | 100(3-100)  | 84/102                   | 72    | 86(76-92)   | 18/102  | 9     | 50(26-74)   | 89(80-95)   | 43(22-66)   |
| ≥45 y   | 7/9                   | 7     | 100                   | 2/9     | 0     | 0           | 78                 | 0           | 16/23                    | 13    | 81(54-96)   | 7/23    | 2     | 29(4-71)    | 72(47-90)   | 40(5-85)    |

<sup>1</sup>Colposcopic impression and/or ZedScan result of CIN2+ of histologically confirmed CIN2+ cases.

<sup>2</sup>Colposcopic impression of CIN2+ of histologically confirmed CIN2+ cases.

<sup>3</sup>Colposcopic impression and ZedScan result less than CIN2 of histologically confirmed cases <CIN2.

<sup>4</sup>Colposcopic impression less than CIN2 of histologically confirmed cases <CIN2

AGC-FN: atypical glandular cells that favour neoplasia; AGC-NOS: atypical glandular cells not otherwise specified; ASC-H: atypical squamous cells that cannot exclude HSIL; ASC-US: atypical squamous cells of undetermined significance; CIN: cervical intraepithelial neoplasia; HSIL: high-grade squamous intraepithelial lesion; LSIL: low-grade squamous intraepithelial lesion; NPV: negative predictive value; PPV: positive predictive value; TZ: transformation zone
