# Supplementary material for: Added value of electrical impedance spectroscopy in adjunction of colposcopy: a prospective cohort study
Source: PubMed Central journal article supplement (PMC10619076; doi:10.1136/bmjopen-2023-074921), 2023-10-29
Supplement: bmjopen-2023-074921supp004.pdf [file bmjopen-2023-074921supp004.pdf]

**Table S3** Sensitivity and specificity of the electrical impedance spectroscopy cohort (EIS) and the reference cohort by cytology, TZ type and age group in identifying CIN2+, with corresponding risk differences and the risk ratios (RR) of sensitivity and specificity.

|             | EIS         |             | Sensitivity                        |                       |         | EIS         |             | Specificity                        |                       |         |
|-------------|-------------|-------------|------------------------------------|-----------------------|---------|-------------|-------------|------------------------------------|-----------------------|---------|
|             | Sensitivity | Sensitivity | Risk difference (95%) <sup>1</sup> | RR (95%) <sup>1</sup> | P value | Specificity | Specificity | Risk difference (95%) <sup>1</sup> | RR (95%) <sup>1</sup> | P value |
| ALL         | 94(90-97)   | 68(63-73)   | 0.26(0.20-0.31)                    | 1.38(1.28-1.49)       | <0.0001 | 34(29-39)   | 84(81-87)   | -0.50(-0.56--0.45)                 | 0.40(0.35-0.46)       | <0.0001 |
| ASC-US      | 94(70-100)  | 56(21-86)   | 0.38(0.04-0.73)                    | 1.69(0.93-3.07)       | 0.0219  | 47(36-59)   | 97(91-99)   | -0.49(-0.61--0.38)                 | 0.49(0.39-0.62)       | <0.0001 |
| LSIL        | 77(61-89)   | 43(31-55)   | 0.34(0.16-0.51)                    | 1.79(1.30-2.45)       | 0.0006  | 42(35-49)   | 92(89-95)   | -0.51(-0.58--0.43)                 | 0.45(0.38-0.53)       | <0.0001 |
| ASC-H       | 99(94-100)  | 63(54-71)   | 0.36(0.27-0.44)                    | 1.57(1.38-1.78)       | <0.0001 | 11(6-19)    | 65(54-74)   | -0.53(-0.65--0.42)                 | 0.17(0.10-0.30)       | <0.0001 |
| HSIL        | 100(95-100) | 86(80-91)   | 0.14(0.08-0.19)                    | 1.16(1.09-1.23)       | 0.0007  | 6(0-29)     | 46(31-61)   | -0.40(-0.58--0.22)                 | 0.13(0.02-0.89)       | 0.0033  |
| AGC-NOS     | 67(9-99)    | 60(15-95)   | 0.07(-0.62-0.75)                   | 1.11(0.38-3.25)       | 0.8504  | 44(24-65)   | 96(78-100)  | -0.52(-0.73--0.30)                 | 0.46(0.29-0.72)       | 0.0001  |
| AGC-FN      | 50(1-99)    | 62(32-86)   | -0.12(-0.86-0.63)                  | 0.81(0.19-3.47)       | 0.7565  | 100(3-100)  | 25(1-81)    | 0.75(0.33-1.17)                    | 4.0(0.73-21.84)       | 0.1709  |
| TZ1         | 94(89-97)   | 67(61-73)   | 0.27(0.20-0.33)                    | 1.40(1.27-1.53)       | <0.0001 | 31(26-37)   | 84(80-88)   | -0.53(-0.60--0.47)                 | 0.37(0.31-0.44)       | <0.0001 |
| TZ2         | 95(87-99)   | 71(62-80)   | 0.24(0.14-0.34)                    | 1.34(1.18-1.57)       | 0.0001  | 40(32-49)   | 84(79-88)   | -0.44(-0.53--0.34)                 | 0.48(0.38-0.59)       | <0.0001 |
| <30 y       | 93(84-98)   | 72(63-79)   | 0.22(0.12-0.32)                    | 1.30(1.15-1.48)       | 0.0007  | 35(26-44)   | 77(70-83)   | -0.42(-0.53--0.31)                 | 0.45(0.35-0.59)       | <0.0001 |
| 30-44 y     | 95(89-98)   | 68(62-75)   | 0.26(0.19-0.34)                    | 1.39(1.25-1.53)       | <0.0001 | 33(27-40)   | 86(81-90)   | -0.53(-0.60--0.45)                 | 0.39(0.32-0.47)       | <0.0001 |
| ≥45 y       | 94(79-99)   | 59(43-73)   | 0.35(0.18-0.52)                    | 1.59(1.23-2.07)       | 0.0008  | 35(24-47)   | 89(82-94)   | -0.54(-0.66--0.42)                 | 0.39(0.28-0.54)       | <0.0001 |
| HG cytology | 99(96-100)  | 75(70-80)   | 0.24(0.19-0.29)                    | 1.32(1.24-1.41)       | <0.0001 | 11(6-18)    | 58(49-66)   | -0.47(-0.56--0.37)                 | 0.19(0.12-0.32)       | <0.0001 |
| LG cytology | 81(69-90)   | 45(35-57)   | 0.36(0.21-0.50)                    | 1.79(1.37-2.33)       | <0.0001 | 43(38-49)   | 93(91-96)   | -0.50(-0.56--0.44)                 | 0.46(0.41-0.53)       | <0.0001 |
| 1 biopsy    | 64(31-89)   | 36(13-65)   | 0.28(-0.10-0.66)                   | 1.78(0.77-4.10)       | 0.1654  | 51(43-59)   | 99(94-100)  | -0.48(-0.56--0.40)                 | 0.51(0.44-0.60)       | <0.0001 |
| 2 biopsies  | 90(81-96)   | 59(49-68)   | 0.31(0.19-0.42)                    | 1.52(1.28-1.81)       | <0.0001 | 23(17-30)   | 90(86-93)   | -0.66(-0.73--0.59)                 | 0.26(0.20-0.34)       | <0.0001 |
| ≥3 biopsies | 100         | 67(60-74)   | 0.33(0.26-0.40)                    | 1.49(1.34-1.65)       | <0.0001 | 0           | 67(59-75)   | -0.67(-0.75--0.59)                 | 0                     | <0.0001 |

<sup>1</sup>The values of risk difference >0 or the values of risk ratio >1 imply better/improved effect with ZedScan.

AGC-FN: atypical glandular cells that favour neoplasia; AGC-NOS: atypical glandular cells not otherwise specified; ASC-H: atypical squamous cells that cannot exclude HSIL; ASC-US: atypical squamous cells of undetermined significance; CIN: cervical intraepithelial neoplasia; HG: high grade; HSIL: high-grade squamous intraepithelial lesion; LG: low grade; LSIL: low-grade squamous intraepithelial lesion; TZ: transformation zone
