# Supplementary material for: Added value of electrical impedance spectroscopy in adjunction of colposcopy: a prospective cohort study
Source: PubMed Central journal article supplement (PMC10619076; doi:10.1136/bmjopen-2023-074921), 2023-10-29
Supplement: bmjopen-2023-074921supp005.pdf [file bmjopen-2023-074921supp005.pdf]

**Table S4** Average number of biopsies by cytology in the electrical impedance spectroscopy (EIS) cohort and in the reference cohort, including only the colposcopists who performed colposcopies in both cohorts.

|        | EIS cohort                 | Reference cohort |
|--------|----------------------------|------------------|
|        | Average number of biopsies |                  |
| ASC-US | 1.7                        | 2.3              |
| LSIL   | 1.8                        | 2.2              |
| ASC-H  | 2.0                        | 2.7              |
| HSIL   | 2.3                        | 2.8              |

ASC-US: atypical squamous cells of undetermined significance; ASC-H: atypical squamous cells that cannot exclude HSIL; HSIL: high-grade squamous intraepithelial lesion LSIL: low-grade squamous intraepithelial lesion
